# Supplementary material for: A useful strategy for synthesis of the disaccharide of OSW-1
Source: Royal Society of Chemistry journal article supplement (doi:10.1039/d3ra05748h), 2023-01-01
Supplement: d3ra05748h1.pdf [file d3ra05748h1.pdf]

## A Useful Strategy for Synthesis of the Disaccharide of OSW-1

Bin Wang<sup>1#\*</sup>, Yan Zhang<sup>1#</sup>, Xiangyan He<sup>2\*</sup>

1, Department of Pharmacy, People's Hospital of Xianjiang Uygur Autonomous Region, Urumqi, Xianjiang Uygur Autonomous Region, China; 2, Scientific Research and Education Centre, People's Hospital of Xianjiang Uygur Autonomous Region, Urumqi, Xianjiang Uygur Autonomous Region, China.

\*Corresponding Author: xiangyan.he9@gmail.com, binw4870@gmail.com

<sup>#</sup>Equal contribution as first-author

|                                                               |     |
|---------------------------------------------------------------|-----|
| 1. General Methods .....                                      | S1  |
| 2. Experimental Procedures and Spectral Data of products..... | S3  |
| 3. NMR and HPLC spectrum.....                                 | S26 |

## 1. General Methods

Thin layer chromatography (TLC) was performed on silica gel 60 F254 plates and components were visualized by ultraviolet light (254 nm) and/or phosphomolybdic acid, 20 wt% solution in ethanol. SiliFlash silica gel (230–400 mesh) was used for all column chromatography. Proton nuclear magnetic resonances ( $^1\text{H}$  NMR) were recorded at 600 MHz or 400 MHz on Bruker 600 or 400 NMR spectrometers. Carbon nuclear magnetic resonances ( $^{13}\text{C}$  NMR) were recorded at 150 MHz or 100 MHz on a Bruker 600 or 400 NMR spectrometers respectively. Chemical shifts are reported in parts per million (ppm) from an internal standard acetone (2.05 ppm), chloroform (7.26 ppm), or methanol- $\text{d}_4$  (3.35 and 4.78 ppm) for  $^1\text{H}$  NMR; and from an internal standard of either residual acetone (206.26 ppm), chloroform (77.00 ppm), or methanol- $\text{d}_4$  (49.3 ppm) for  $^{13}\text{C}$  NMR. NMR peak multiplicities are denoted as follows: s (singlet), d (doublet), t (triplet), q (quartet), dd (doublet of doublet), td (doublet of triplet), dt (triplet of doublet), and m (multiplet). Coupling constants ( $J$ ) are given in hertz (Hz).

## 2. Experimental Procedures and Spectral Data of products

**Table S1** Optimization of regioselective introducing the TBS at the C-4 hydroxy position

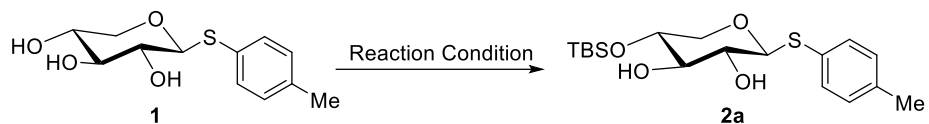

| Entry    | TBSCl        | Base              | Concentration (nM) | Temperature | Yield              |
|----------|--------------|-------------------|--------------------|-------------|--------------------|
| 1        | 1.0eq        | imidazole         | 0.05               | rt          | 78%                |
| 2        | 1.1eq        | imidazole         | 0.05               | rt          | 82%                |
| 3        | 1.3eq        | imidazole         | 0.05               | rt          | 70%                |
| 4        | 1.1eq        | DIPEA             | 0.05               | rt          | 73%                |
| 5        | 1.1eq        | 2,6-Lutidine      | 0.05               | rt          | 69%                |
| 6        | 1.1eq        | Et <sub>3</sub> N | 0.05               | rt          | 79%                |
| 7        | 1.1eq        | imidazole         | 0.1                | rt          | 47%                |
| <b>8</b> | <b>1.1eq</b> | <b>imidazole</b>  | <b>0.02</b>        | <b>rt</b>   | <b>85%</b>         |
| 9        | 1.1eq        | imidazole         | 0.01               | rt          | 85%                |
| 10       | 1.1eq        | imidazole         | 0.02               | 0°C         | 81% <sup>[b]</sup> |
| 11       | 1.1eq        | imidazole         | 0.02               | 40°C        | 63%                |

Reaction condition: [a] TBSCl (1.1 eq), imidazole (1.3 eq), DCM (c =0.02), room temperature, 1.5 hours.

[b] reaction time delay to 3 hours.

For optimization of the reaction conditions of regioselective introducing the TBS at the C-4 hydroxy position, we used compound **1** and TBSCl as standard substrates (Table S1). Initially, we tested a series of TBSCl concentrations, 1.1 eq of TBSCl provided compound **2a** in high yield (Entries 1-3). Next, a brief base-screening was undertaken and no improved result was obtained (Entries 4-6). Furthermore, the influence of the concentration of compound **1** was also explored (Entries 7-9) and the best result was achieved in low concentration (Entries 8 and 9). The optimal concentration of compound **1** is 0.02 nM because compound **1** at 0.1 nM does not completely dissolve the substrate in DCM and compound **1** at 0.01 nM requires too much solvent. Moreover, the temperature turned out to have an important effect on this reaction (Entries 10 and 11). The lowering the reaction temperature and extending the reaction time to 3 hours, the reaction also provided 81% yield (Entry 10). Unfortunately, the reaction temperature increased to 40°C, the yield of compound **2a** was decreased to 63% (Entry 11).

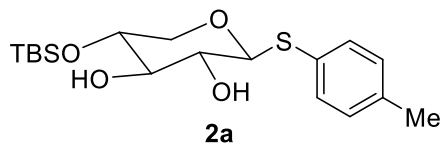

Butyldimethylsilyl chloride (4.11 g, 27.24 mmol) in dichloromethane was slowly dropped into a solution of **2** (6.0 g, 24.76 mmol) and imidazole (1.72 g, 27.24 mmol) in dichloromethane (500 mL). The reaction mixture was stirred at room temperature for 1.5 hours. The reaction mixture was quenched with saturated ammonium chloride (200 mL), and the aqueous layer was extracted with dichloromethane (200 mL) and washed with saturated brine (200 mL). The combined organic layer was dried over Na<sub>2</sub>SO<sub>4</sub> and concentrated under reduced pressure. The residue was purified by column chromatography (ethyl acetate-hexanes, 1: 2) giving the desired compound **2a** (7.15 g, 81%) as a yellow oil. <sup>1</sup>H NMR (600 MHz, CDCl<sub>3</sub>) δ 7.43 (d, *J* = 7.8 Hz, 2H, 2 × ArH), 7.13 (d, *J* = 7.8 Hz, 2H, 2 × ArH), 4.52 (d, *J* = 9.0 Hz, 1H, H-1), 3.98 (dd, *J*<sub>1</sub> = 11.4 Hz, *J*<sub>2</sub> = 4.8 Hz, 1H, H-6), 3.63-3.61 (m, 1H, H-4), 3.53 (t, *J* = 7.8 Hz, 1H, H-3), 3.38 (t, *J* = 8.4 Hz, 1H, H-2), 3.23 (t, *J* = 11.4 Hz, 1H, H-5), 2.96 (s, 2H, 2 × OH), 2.35 (s, 3H, CH<sub>3</sub>), 0.88 (s, 9H, (CH<sub>3</sub>)<sub>3</sub>C-Si), 0.14 (s, 3H, CH<sub>3</sub>-Si), 0.09 (s, 3H, CH<sub>3</sub>-Si); <sup>13</sup>C NMR (150 MHz, CDCl<sub>3</sub>) δ 138.4, 133.2, 129.8, 1238.2, 88.9, 77.5, 71.7, 70.6, 25.7, 21.1, 17.9, -4.6, -4.7. HRMS(ESI) *m/z* calcd for C<sub>18</sub>H<sub>30</sub>O<sub>4</sub>SSi ([M+Na<sup>+</sup>]): 393.1526, found 393.1519.

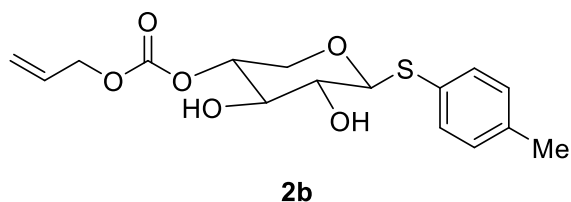

Allyl chloroformate (0.74 g, 6.14 mmol) in dichloromethane was slowly dropped into a solution of **2** (1.5 g, 5.85 mmol) and N,N-Diisopropylethylamine (0.83 g, 6.44 mmol) in dichloromethane (200 mL). The reaction mixture was stirred at room temperature overnight. The reaction mixture was quenched with saturated ammonium chloride (80 mL), and the aqueous layer was extracted with dichloromethane (100 mL) and washed with saturated brine (80 mL). The combined organic layer was dried over Na<sub>2</sub>SO<sub>4</sub> and concentrated under reduced pressure. The residue was purified by column chromatography (ethyl acetate-hexanes, 1: 2) giving the desired compound **2b** (1.39 g,

70%) as a yellow oil.  $^1\text{H}$  NMR (600 MHz,  $\text{CDCl}_3$ )  $\delta$  7.39 (d,  $J = 7.8$  Hz, 2H,  $2 \times \text{ArH}$ ), 7.14 (d,  $J = 7.8$  Hz, 2H,  $2 \times \text{ArH}$ ), 5.99-5.92 (m, 1H,  $\text{CH}_2=\text{CH}-\text{CH}_2-$ ), 5.47 (d,  $J = 4.8$  Hz, 1H, H-4), 5.40 (d,  $J = 16.8$  Hz, 1H,  $\text{CH}_2=\text{CH}-\text{CH}_2-$ ), 5.31 (d,  $J = 10.2$  Hz, 1H,  $\text{CH}_2=\text{CH}-\text{CH}_2-$ ), 4.71-4.67 (m, 3H, H-1,  $\text{CH}_2=\text{CH}-\text{CH}_2-$ ), 4.12 (t,  $J = 10.8$  Hz, 1H, H-6), 3.97 (dd,  $J_1 = 11.4$  Hz,  $J_2 = 12.0$  Hz, 1H, H-5), 3.90 (dd,  $J_1 = 9.0$  Hz,  $J_2 = 5.4$  Hz, 1H, H-2), 3.82 (t,  $J = 9.0$  Hz, 1H, H-3), 2.34 (s, 3H,  $\text{CH}_3$ );  $^{13}\text{C}$  NMR (150 MHz,  $\text{CDCl}_3$ )  $\delta$  177.5, 154.4, 138.1, 132.4, 131.0, 129.9, 119.5, 90.5, 74.7, 72.5, 72.1, 69.0, 60.3, 21.1. HRMS(ESI)  $m/z$  calcd for  $\text{C}_{16}\text{H}_{20}\text{O}_6\text{S}$  ( $[\text{M}+\text{Na}^+]$ ): 363.3792, found 363.3799.

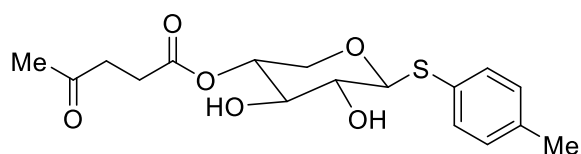

**2c**

Methyl levulinate (0.53 g, 4.10 mmol) in dichloromethane was dropped into a solution of **2** (1.0 g, 3.57 mmol), *N,N*-diisopropylcarbodiimide (0.54 g, 4.29 mmol) and triethylamine (0.43 g, 4.29 mmol), in dichloromethane (150 mL). The reaction mixture was stirred at room temperature overnight. The reaction mixture was quenched with saturated ammonium chloride (80 mL), and the aqueous layer was extracted with dichloromethane (100 mL) and washed with saturated brine (80 mL). The combined organic layer was dried over  $\text{Na}_2\text{SO}_4$  and concentrated under reduced pressure. The residue was purified by column chromatography (ethyl acetate-hexanes, 1: 2) giving the desired compound **2c** (0.72 g, 57%) as a yellow oil.  $^1\text{H}$  NMR (600 MHz,  $\text{CDCl}_3$ )  $\delta$  7.43 (d,  $J = 7.8$  Hz, 2H,  $2 \times \text{ArH}$ ), 7.12 (d,  $J = 7.8$  Hz, 2H,  $2 \times \text{ArH}$ ), 4.83-4.79 (m, 1H, H-4), 4.46 (d,  $J = 9.6$  Hz, 1H, H-1), 4.10 (dd,  $J_1 = 11.4$  Hz,  $J_2 = 5.4$  Hz, 1H, H-6), 3.71 (t,  $J = 9.0$  Hz, 1H, H-3), 3.38 (t,  $J = 9.0$  Hz, 1H, H-2), 3.28 (t,  $J = 9.0$  Hz, 1H, H-5), 3.10 (s, 2H,  $2 \times \text{OH}$ ), 2.77 (t,  $J = 6.6$  Hz, 2H), 2.62-2.53 (m, 2H), 2.34 (s, 3H,  $\text{CH}_3-\text{C}=\text{O}$ -), 2.18 (s, 3H,  $\text{CH}_3$ );  $^{13}\text{C}$  NMR (150 MHz,  $\text{CDCl}_3$ )  $\delta$  207.2, 172.3, 138.6, 133.6, 129.8, 127.5, 88.4, 75.3, 71.8, 71.2, 66.3, 38.0, 29.7, 27.9, 21.1. HRMS(ESI)  $m/z$  calcd for  $\text{C}_{17}\text{H}_{22}\text{O}_6\text{S}$  ( $[\text{M}+\text{H}^+]$ ): 355.4243, found 355.4238.

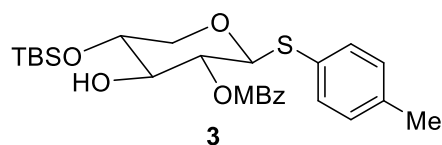

4-Methoxybenzoyl chloride (2.30 g, 13.46 mmol) in dichloromethane was slowly dropped into a solution of compound **2a** (4.0 g, 11.22 mmol), 4-(dimethylamino)pyridine (137 mg, 1.12 mmol) and dry triethylamine (1.70 g, 16.83 mmol) in dry dichloromethane (135 mL). The reaction mixture was stirred at room temperature for 2 hours. The reaction mixture was quenched with saturated ammonium chloride (60 mL), and the aqueous layer was extracted with dichloromethane (40 mL) and then washed with saturated brine (60 mL). The combined organic layer was dried over Na<sub>2</sub>SO<sub>4</sub> and concentrated under reduced pressure. The residue was purified by column chromatography (ethyl acetate –hexanes, 1: 3) giving the desired compound **3** (4.7 g, 86%) as a yellow oil. <sup>1</sup>H NMR (400 MHz, CDCl<sub>3</sub>) δ 8.05 (d, *J* = 8.8 Hz, 2H, 2 × ArH), 7.34 (d, *J* = 8.4 Hz, 2H, 2 × ArH), 7.09 (d, *J* = 8.0 Hz, 2H, 2 × ArH), 6.94 (d, *J* = 9.2 Hz, 2H, 2 × ArH), 4.96 (t, *J* = 9.6 Hz, 1H, H-2), 4.73 (d, *J* = 9.6 Hz, 1H, H-1), 4.00 (dd, *J*<sub>1</sub> = 11.6 Hz, *J*<sub>2</sub> = 4.8 Hz, 1H, H-6), 3.88 (s, 3H, CH<sub>3</sub>-O), 3.77-3.67 (m, 2H, H-3, H-4), 3.28 (q, *J* = 9.6 Hz, 1H, H-5), 2.60 (t, *J* = 2.8 Hz, 1H, OH), 2.33 (s, 3H, CH<sub>3</sub>), 0.90 (s, 9H, (CH<sub>3</sub>)<sub>3</sub>C-Si), 0.12 (s, 3H, CH<sub>3</sub>-Si), 0.10 (s, 3H, CH<sub>3</sub>-Si); <sup>13</sup>C NMR (100 MHz, CDCl<sub>3</sub>) δ 165.9, 163.7, 138.2, 133.3, 132.1, 129.7, 128.6, 121.9, 113.7, 87.0, 77.5, 72.7, 71.4, 70.0, 55.4, 25.7, 21.1, 18.0, -4.6, -4.7. HRMS(ESI) *m/z* calcd for C<sub>26</sub>H<sub>36</sub>O<sub>6</sub>SSi ([M+H<sup>+</sup>]): 505.7203, found 505.7213.

**Table S2** Optimization of regioselective introducing the TES at the C-3 hydroxy position.Reaction condition: TESOTf (1.5 eq), DMAP (0.1 eq), Et<sub>3</sub>N (2.0 eq), DMF, room temperature, 2h.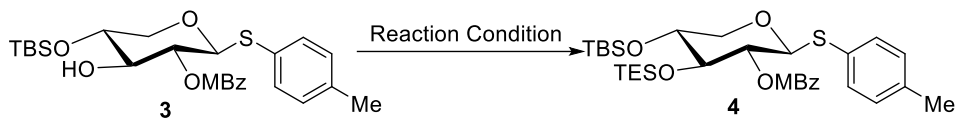

| Entry    | TESR                | Base                   | Solvent    | Temperature | Yield              |
|----------|---------------------|------------------------|------------|-------------|--------------------|
| 1        | 1.5eq TESOTf        | Et <sub>3</sub> N      | DCM        | rt          | 45% <sup>[b]</sup> |
| 2        | 1.5eq TESOTf        | Et <sub>3</sub> N      | THF        | rt          | 48% <sup>[b]</sup> |
| <b>3</b> | <b>1.5eq TESOTf</b> | <b>Et<sub>3</sub>N</b> | <b>DMF</b> | <b>rt</b>   | <b>79%</b>         |
| 4        | 2.0eq TESOTf        | Et <sub>3</sub> N      | DMF        | rt          | 78%                |
| 5        | 1.2eq TESOTf        | Et <sub>3</sub> N      | DMF        | rt          | 71%                |
| 6        | 2.0eq TESCOI        | Et <sub>3</sub> N      | DMF        | rt          | 52%                |
| 7        | 1.5eq TESOTf        | DIPEA                  | DMF        | rt          | 72%                |
| 8        | 1.5eq TESOTf        | 2,6-Lutidine           | DMF        | rt          | 63%                |
| 9        | 1.5eq TESOTf        | imidazole              | DMF        | rt          | 61%                |
| 10       | 1.5eq TESOTf        | Et <sub>3</sub> N      | DMF        | 40°C        | 76%                |
| 11       | 1.5eq TESOTf        | Et <sub>3</sub> N      | DMF        | 80°C        | 65%                |

[b] reaction time delay to 8 hours. [c] reaction time delay to 24 hours

For optimization of the reaction conditions of regioselective introducing the TES at the C-3 hydroxy position, we used compound **3** as standard substrates (Table S2). Initially, we found that the solvent had a profound effect on the reaction, DCM and THF as normal solvents for hydroxy protection reaction were found to be unsuitable for this reaction (Entries 1 and 2). Utilizing DMF as a solvent, the reaction exhibits excellent result (Entry 3). Next, the different equivalent of TESOTf was screened and no improved result was obtained (Entries 4-5). Replacing the TESOTf with TESCOI resulted in an extremely less efficient reaction (entry 6). Furthermore, a brief base-screening was undertaken and no improved result was obtained (Entries 7-9). Moreover, increasing the temperature has no positive effects to improve the yield of compound **4** (Entries 10 and 11).

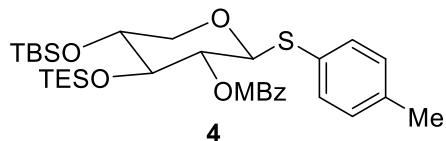

Triethylsilyl trifluoromethanesulfonate (3.23 g, 12.23 mmol) was added in one portion to a solution of compound **3** (4.0 g, 8.15 mmol), 4-(dimethylamino)pyridine (100 mg, 0.82 mmol) and triethylamine (1.65 g, 16.30 mmol) in dry dimethylformamide (80 mL). The reaction mixture was stirred at 30°C - 40°C for 4 hours. The reaction mixture was quenched with saturated ammonium chloride (200 mL). The aqueous layer was extracted with dichloromethane (200 mL), and then washed with saturated brine (100 mL). The combined organic layer was dried over Na<sub>2</sub>SO<sub>4</sub> and concentrated under reduced pressure. The residue was purified by column chromatography (ethyl acetate –hexanes, 1: 6) giving the desired compound **4** (4.09 g, 83%) as a yellow oil. <sup>1</sup>H NMR (400 MHz, CDCl<sub>3</sub>) δ 8.05 (d, *J* = 8.8 Hz, 2H, 2 × Ar*H*), 7.36 (d, *J* = 8.0 Hz, 2H, 2 × Ar*H*), 7.07 (t, *J* = 7.2 Hz, 1H, 2 × Ar*H*), 6.91 (d, *J* = 9.0 Hz, 2H, 2 × Ar*H*), 5.09-5.06 (m, 2H, H-2, H-1), 4.39 (dd, *J*<sub>1</sub> = 12.0 Hz, *J*<sub>2</sub> = 3.2 Hz, 1H, H-6), 3.87 (t, *J* = 5.4 Hz, 1H, H-4), 3.86 (s, 3H), 3.68-3.65 (m, 1H, H-3), 3.43 (dd, *J*<sub>1</sub> = 12.0 Hz, *J*<sub>2</sub> = 3.6 Hz, 1H, H-5), 0.93 (t, *J* = 8.4 Hz, 9H, CH<sub>3</sub>CH<sub>2</sub>-), 0.90 (s, 9H, (CH<sub>3</sub>)<sub>3</sub>C-Si), 0.63 (q, *J* = 7.8 Hz, 6H, CH<sub>3</sub>CH<sub>2</sub>-), 0.06 (s, 3H, CH<sub>3</sub>-Si), 0.00 (s, 3H, CH<sub>3</sub>-Si); <sup>13</sup>C NMR (100 MHz, CDCl<sub>3</sub>) δ 165.3, 163.4, 135.9, 132.0, 131.1, 128.8, 127.1, 122.4, 113.4, 86.8, 72.7, 72.0, 70.5, 65.3, 55.4, 25.8, 18.1, 6.84, 4.81, -4.4, -4.7. HRMS(ESI) *m/z* calcd for C<sub>32</sub>H<sub>50</sub>O<sub>6</sub>SSi<sub>2</sub> ([M+H<sup>+</sup>]): 619.9833, found 619.9826.

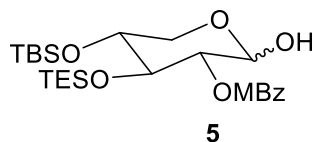

N-bromosuccinimide (2.05 g, 11.57 mmol) was added into a solution of **4** (3.5 g, 5.78 mmol) in acetone/H<sub>2</sub>O (60 mL, 6:1). The reaction mixture was stirred at this temperature for 1 hour. The reaction mixture was quenched with saturated NaHCO<sub>3</sub> (20 mL), and the aqueous layer was extracted with dichloromethane (60 mL). The organic layer washed with saturated brine (30 mL). The combined organic layer was dried over Na<sub>2</sub>SO<sub>4</sub> and concentrated under reduced pressure. The



residue was purified by column chromatography (ethyl acetate –hexanes, 1: 3) giving the desired compound **5** (2.07 g, 70%) as a yellow oil.  $^1\text{H}$  NMR (600 MHz,  $\text{CDCl}_3$ )  $\delta$  8.05 (d,  $J = 8.4$  Hz, 4H,  $4 \times \text{ArH}$ ), 6.92 (d,  $J = 8.8$  Hz, 4H,  $4 \times \text{ArH}$ ), 5.28-5.26 (m, 1H), 4.86-4.83 (m, 1H), 4.14 (t,  $J = 6.4$  Hz, 1H), 3.87 (t,  $J = 5.4$  Hz, 1H), 3.88 (s, 3H), 3.84-3.68 (m, 2H), 3.64-3.56 (m, 1H), 3.43 (dd,  $J_1 = 12.0$  Hz,  $J_2 = 6.0$  Hz, 1H), 2.98 (d,  $J = 6.8$  Hz, 1H), 0.94-0.89 (m, 1H), 0.85 (s, 15H), 0.65-0.58 (m, 1H), 0.14 (s, 3H), 0.85 (s, 3H), 0.03 (s, 3H), 0.01 (s, 3H);  $^{13}\text{C}$  NMR (150 MHz,  $\text{CDCl}_3$ )  $\delta$  165.3, 163.4, 135.9, 132.0, 131.1, 128.8, 127.1, 122.4, 113.4, 86.8, 72.7, 72.0, 70.5, 65.3, 55.4, 25.8, 18.1, 6.84, 4.81, -4.4, -4.7. HRMS(ESI)  $m/z$  calcd for  $\text{C}_{25}\text{H}_{44}\text{O}_7\text{Si}_2$  ( $[\text{M}+\text{H}^+]$ ): 513.7973, found 513.7968.

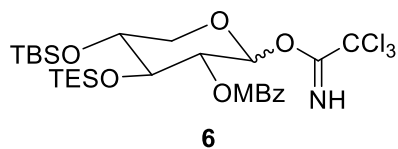

1,8-diazabicyclo[5.4.0]undec-7-ene (114 mg, 0.75 mmol) was added into a solution of **5** (2.0 g, 3.87 mmol) and trichloroacetonitrile (1 mL) in dry dichloromethane (30 mL). The reaction mixture was stirred at this temperature overnight. The reaction mixture was concentrated under reduced pressure. The residue was purified by column chromatography (EtOAc-hexanes-triethylamine, 1: 4:0.1) giving the desired compound **6** (1.98g, 78%) as a yellow oil.

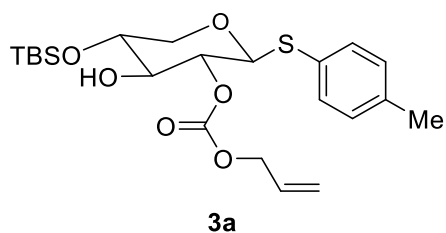

Allyl chloroformate (0.78 g, 6.47 mmol) in dichloromethane was slowly dropped into a solution of compound **2a** (2.0 g, 5.39 mmol), 4-(dimethylamino)pyridine (66 mg, 0.54 mmol) and dry triethylamine (0.6 g, 5.93 mmol) in dry dichloromethane (60 mL). The reaction mixture was stirred at room temperature for 2 hours. The reaction mixture was quenched with saturated ammonium chloride (60 mL), and the aqueous layer was extracted with dichloromethane (40 mL) and then washed with saturated brine (60 mL). The combined organic layer was dried over  $\text{Na}_2\text{SO}_4$

and concentrated under reduced pressure. The residue was purified by column chromatography (ethyl acetate –hexanes, 1: 3) giving the desired compound **3a** (1.86 g, 76%) as a yellow oil.  $^1\text{H}$  NMR (600 MHz,  $\text{CDCl}_3$ )  $\delta$  7.40 (d,  $J = 7.8$  Hz, 2H,  $2 \times \text{ArH}$ ), 7.12 (d,  $J = 7.8$  Hz, 2H,  $2 \times \text{ArH}$ ), 5.98 (ddt,  $J_1 = 17.2$  Hz,  $J_2 = 10.8$  Hz,  $J_3 = 5.6$  Hz, 1H,  $\text{CH}_2=\text{CH}-\text{CH}_2-$ ), 5.42 (d,  $J = 17.2$  Hz, 1H,  $\text{CH}_2=\text{CH}-\text{CH}_2-$ ), 5.31 (d,  $J = 10.8$  Hz, 1H,  $\text{CH}_2=\text{CH}-\text{CH}_2-$ ), 4.77-4.68 (m, 2H,  $\text{CH}_2=\text{CH}-\text{CH}_2-$ ), 4.62 (t,  $J = 9.6$  Hz, 1H, H-2), 4.57 (d,  $J = 10.2$  Hz, 1H, H-1), 3.93 (dd,  $J_1 = 11.4$  Hz,  $J_2 = 5.4$  Hz, 1H, H-6), 3.69-3.65 (m, 1H, H-4), 3.61 (t,  $J = 9.0$  Hz, 1H, H-3), 3.20 (t,  $J = 10.2$  Hz, 1H, H-5), 2.35 (s, 3H,  $\text{CH}_3$ ), 0.88 (s, 9H,  $(\text{CH}_3)_3\text{C}-\text{Si}$ ), 0.11 (s, 3H,  $\text{CH}_3-\text{Si}$ ), 0.08 (s, 3H,  $\text{CH}_3-\text{Si}$ );  $^{13}\text{C}$  NMR (150 MHz,  $\text{CDCl}_3$ )  $\delta$  154.5, 138.3, 133.3, 131.3, 129.7, 128.5, 119.0, 86.9, 77.1, 75.8, 71.1, 69.9, 68.9, 25.6, 21.1, 17.9, -4.5, -4.6. HRMS(ESI)  $m/z$  calcd for  $\text{C}_{22}\text{H}_{34}\text{O}_6\text{SSi}$  ( $[\text{M}+\text{K}^+]$ ): 493.6162, found 493.6169.

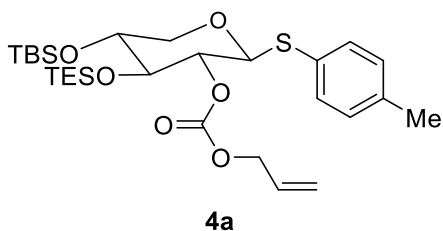

Triethylsilyl trifluoromethanesulfonate (1.74 g, 6.59 mmol) was added in one portion to a solution of compound **3a** (1.5 g, 3.29 mmol), 4-(dimethylamino)pyridine (40 mg, 0.33 mmol) and triethylamine (0.49 g, 4.94 mmol) in dry dimethylformamide (30 mL). The reaction mixture was stirred at 30°C - 40°C for 4 hours. The reaction mixture was quenched with saturated ammonium chloride (40 mL). The aqueous layer was extracted with dichloromethane (100 mL) and then washed with saturated brine (60 mL). The combined organic layer was dried over  $\text{Na}_2\text{SO}_4$  and concentrated under reduced pressure. The residue was purified by column chromatography (silica, Ethyl acetate –hexanes, 1: 6) giving the desired compound **4a** (1.44 g, 77%) as a yellow oil.  $^1\text{H}$  NMR (600 MHz,  $\text{CDCl}_3$ )  $\delta$  7.39 (d,  $J = 7.8$  Hz, 2H,  $2 \times \text{ArH}$ ), 7.10 (d,  $J = 7.8$  Hz, 2H,  $2 \times \text{ArH}$ ), 5.97 (ddt,  $J_1 = 16.8$  Hz,  $J_2 = 10.8$  Hz,  $J_3 = 6.0$  Hz, 1H,  $\text{CH}_2=\text{CH}-\text{CH}_2-$ ), 5.41 (d,  $J = 16.8$  Hz, 1H,  $\text{CH}_2=\text{CH}-\text{CH}_2-$ ), 5.30 (d,  $J = 10.8$  Hz, 1H,  $\text{CH}_2=\text{CH}-\text{CH}_2-$ ), 4.77 (d,  $J = 7.8$  Hz, 1H, H-1), 4.69 (dq,  $J_1 = 13.2$  Hz,  $J_2 = 5.4$  Hz, 2H,  $\text{CH}_2=\text{CH}-\text{CH}_2-$ ), 4.62 (t,  $J = 7.8$  Hz, 1H, H-2), 4.12

(dd,  $J_1 = 12.0$  Hz,  $J_2 = 4.2$  Hz, 1H, H-6), 3.71 (t,  $J = 7.2$  Hz, 1H, H-3), 3.65-3.62 (m, 1H, H-4), 3.24 (dd,  $J_1 = 12.0$  Hz,  $J_2 = 8.4$  Hz, 1H, H-5), 2.33 (s, 3H, CH<sub>3</sub>), 0.97 (t,  $J = 8.4$  Hz, 9H, CH<sub>3</sub>CH<sub>2</sub>-), 0.89 (s, 9H, (CH<sub>3</sub>)<sub>3</sub>C-Si), 0.60 (q,  $J = 7.8$  Hz, 6H, CH<sub>3</sub>CH<sub>2</sub>-), 0.09 (s, 6H, CH<sub>3</sub>-Si); <sup>13</sup>C NMR (150 MHz, CDCl<sub>3</sub>) 154.3, 137.7, 132.3, 131.4, 130.7, 129.6, 118.9, 87.4, 76.5, 74.7, 70.9, 68.7, 67.9, 25.9, 21.1, 18.0, 6.9, 4.9, -4.2, -4.6. HRMS(ESI)  $m/z$  calcd for C<sub>28</sub>H<sub>48</sub>O<sub>6</sub>SSi<sub>2</sub> ([M+H<sup>+</sup>]): 569.9233, found 569.9239.

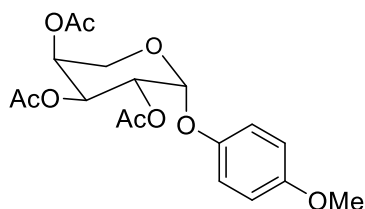

**8**

Boron trifluoride diethyl etherate (6.0 mL) in dichloromethane was slowly dropped into a solution of **7** (8.0 g, 25.56 mmol), 4-methoxyphenol (6.34 g, 51.12 mmol) in dry dichloromethane (200 mL) at 0°C. The reaction mixture was stirred at room temperature for 4 days hours. The reaction mixture was quenched with triethylamine (20 mL), and then diluted with dichloromethane (200 mL) then washed with saturated brine (200 mL). The combined organic layer was dried over Na<sub>2</sub>SO<sub>4</sub> and concentrated under reduced pressure. The residue was purified by column chromatography (ethyl acetate –hexanes, 1: 4) giving the desired compound **8** (5.95 g, 57%) as a yellow oil. <sup>1</sup>H NMR (400 MHz, CDCl<sub>3</sub>) δ 6.99 (d,  $J = 8.8$  Hz, 2H, 2 × ArH), 6.83 (d,  $J = 8.8$  Hz, 2H, 2 × ArH), 5.66 (d,  $J = 7.6$  Hz, 1H, H-1), 5.57 (dd,  $J_1 = 10.8$  Hz,  $J_2 = 3.2$  Hz, 1H, H-3), 5.42-5.41 (m, 1H, H-4), 5.31 (dd,  $J_1 = 10.8$  Hz,  $J_2 = 3.2$  Hz, 1H, H-2), 4.10 (d,  $J = 12.8$  Hz, 1H, H-6), 3.78-3.73 (m, 4H, H-5, CH<sub>3</sub>O-), 2.21 (s, 3H, CH<sub>3</sub>C=O-), 2.13 (s, 3H, CH<sub>3</sub>C=O-), 2.06 (s, 3H, CH<sub>3</sub>C=O-); <sup>13</sup>C NMR (100 MHz, CDCl<sub>3</sub>) δ 170.4, 170.3, 170.1, 155.3, 150.4, 117.8, 114.7, 95.9, 69.0, 68.1, 67.1, 61.1, 55.6, 20.9, 20.73, 20.7. HRMS(ESI)  $m/z$  calcd for C<sub>18</sub>H<sub>22</sub>O<sub>9</sub> ([M+H<sup>+</sup>]): 383.3725, found 383.3727.

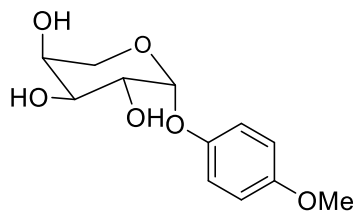

**9**

Sodium methoxide (113 mg, 2.09 mmol) was added into a solution of **8** (8.0 g, 20.92 mmol) in dry methanol (200 mL) at 0°C. The reaction mixture was stirred at room temperature overnight. The reaction mixture was concentrated under reduced pressure. The residue was purified by column chromatography (100% Ethyl acetate) and gave desired compound **9** (4.82 g, 90%) as white solid. <sup>1</sup>H NMR (600 MHz, Methanol-d<sub>6</sub>) δ 7.06 (d, *J* = 8.4 Hz, 2H, 2 × ArH), 6.85 (d, *J* = 8.4 Hz, 2H, 2 × ArH), 5.39 (d, *J* = 3.0 Hz, 1H, H-1), 3.99-3.93 (m, 4H, H-2, H-3, H-4, H-6), 3.76 (s, 3H, CH<sub>3</sub>O-), 3.66 (d, *J* = 12.0 Hz, 1H, H-5); <sup>13</sup>C NMR (100 MHz, Methanol-d<sub>6</sub>) δ 155.2, 151.3, 117.9, 114.1, 99.3, 69.4, 69.2, 68.8, 63.4, 54.7. HRMS(ESI) *m/z* calcd for C<sub>12</sub>H<sub>16</sub>O<sub>6</sub> ([M+H<sup>+</sup>]): 257.2615, found 257.2602.

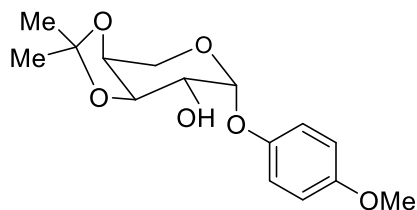

**10**

*p*-Toluenesulfonic acid monohydrate (297 mg, 1.56 mmol) added into a solution of **9** (4.0 g, 15.61 mmol), 2,2-dimethoxypropane (16.23 g, 156.09 mmol) in dry acetone (100 mL) at 0°C. The reaction mixture was stirred at room temperature overnight. The reaction mixture was quenched with triethylamine (20 mL), and then diluted with dichloromethane (200 mL) then washed with saturated brine (200 mL). The combined organic layer was dried over Na<sub>2</sub>SO<sub>4</sub> and concentrated under reduced pressure. The residue was purified by column chromatography (ethyl acetate – hexanes, 1: 3) gave desired compound **10** (3.84 g, 83%) as a yellow oil. <sup>1</sup>H NMR (600 MHz, CDCl<sub>3</sub>) δ 7.03 (d, *J* = 9.0 Hz, 2H, 2 × ArH), 6.84 (d, *J* = 9.0 Hz, 2H, 2 × ArH), 5.41 (d, *J* = 3.0 Hz, 1H, H-1), 4.36 (d, *J* = 6.6 Hz, 1H, H-3), 4.30 (d, *J* = 5.4 Hz, 1H, H-4), 4.10 (d, *J* = 13.2 Hz, 1H,

H-6), 4.00 (d,  $J = 13.8$  Hz, 1H, H-5), 3.94-3.92 (m, 1H, H-2), 3.78 (s, 3H,  $CH_3O-$ ), 1.57 (s, 3H,  $CH_3$ ), 1.40 (s, 3H,  $CH_3$ );  $^{13}C$  NMR (150 MHz,  $CDCl_3$ )  $\delta$  155.3, 150.4, 117.8, 114.7, 109.4, 97.4, 72.9, 70.2, 60.2, 55.6, 27.9, 25.9. HRMS(ESI)  $m/z$  calcd for  $C_{15}H_{20}O_6$  ( $[M+H^+]$ ): 297.3265, found 297.3259.

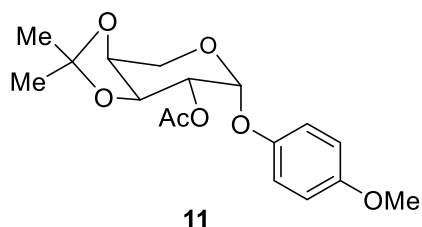

Acetic anhydride (2.07 g, 20.25 mmol) was added in one portion to a solution of compound **10** (3.0 g, 6.75 mmol) in dry pyridine (30 mL). The reaction mixture was stirred at room temperature overnight. The reaction mixture was evaporated, and then diluted with the dichloromethane (100 mL), then washed with saturated brine (80 mL). The combined organic layer was dried over  $Na_2SO_4$  and concentrated under reduced pressure. The residue was purified by column chromatography (ethyl acetate –hexanes, 1: 4) giving the desired compound **11** (5.02 g, 88%) as a yellow oil.  $^1H$  NMR (600 MHz,  $CDCl_3$ )  $\delta$  6.99 (d,  $J = 8.4$  Hz, 2H,  $2 \times ArH$ ), 6.83 (d,  $J = 8.4$  Hz, 2H,  $2 \times ArH$ ), 5.52 (d,  $J = 3.0$  Hz, 1H, H-1), 5.02 (dd,  $J_1 = 7.8$  Hz,  $J_2 = 3.6$  Hz, 1H, H-2), 4.53 (dd,  $J_1 = 7.8$  Hz,  $J_2 = 6.0$  Hz, 1H, H-3), 4.33 (d,  $J = 5.4$  Hz, 1H, H-4), 4.07 (s, 2H, H-5, H-6), 3.78 (s, 3H,  $CH_3O-$ ), 2.14 (s, 3H,  $CH_3$ ), 1.58 (s, 3H,  $CH_3$ ), 1.40 (s, 3H,  $CH_3$ );  $^{13}C$  NMR (100 MHz,  $CDCl_3$ )  $\delta$  170.6, 155.2, 150.5, 117.6, 114.7, 109.6, 95.4, 73.4, 72.9, 72.0, 59.2, 55.7, 27.9, 26.3, 20.9. HRMS(ESI)  $m/z$  calcd for  $C_{17}H_{22}O_7$  ( $[M+Na^+]$ ): 361.3452, found 361.3459.

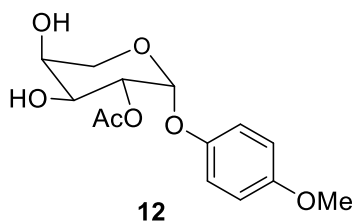

A solution of compound **11** (4.0 g, 11.82 mmol) in 70%  $AcOH/H_2O$  (60 mL) was stirred at  $70^\circ C - 80^\circ C$  for 3 hours. The reaction mixture was evaporated, and then diluted with the dichloromethane

(60 mL) then washed with saturated brine (30 mL). The combined organic layer was dried over  $\text{Na}_2\text{SO}_4$  and concentrated under reduced pressure. The residue was purified by column chromatography (ethyl acetate – hexanes, 1: 3) giving the desired compound **12** (3.03 g, 86%) as a yellow oil.  $^1\text{H}$  NMR (400 MHz,  $\text{CDCl}_3$ )  $\delta$  6.99 (d,  $J = 9.0$  Hz, 2H,  $2 \times \text{ArH}$ ), 6.83 (d,  $J = 9.0$  Hz, 2H,  $2 \times \text{ArH}$ ), 5.58 (d,  $J = 3.0$  Hz, 1H, H-1), 5.15 (dd,  $J_1 = 10.2$  Hz,  $J_2 = 3.0$  Hz, 1H, H-2), 4.25 (d,  $J = 7.8$  Hz, 1H, H-3), 4.10 (s, 1H, H-4), 4.03 (d,  $J = 12.6$  Hz, 1H, H-6), 3.82 (d,  $J = 12.6$  Hz, 1H, H-5), 3.77 (s, 3H,  $\text{CH}_3\text{O}$ -), 2.97 (s, 2H,  $2 \times \text{OH}$ ), 2.16 (s, 3H,  $\text{CH}_3$ );  $^{13}\text{C}$  NMR (150 MHz,  $\text{CDCl}_3$ )  $\delta$  171.6, 155.2, 150.6, 117.9, 114.6, 96.2, 71.8, 69.3, 67.8, 62.8, 55.6, 20.9. HRMS(ESI)  $m/z$  calcd for  $\text{C}_{14}\text{H}_{18}\text{O}_7$  ( $[\text{M}+\text{Na}^+]$ ): 321.2802, found 321.2793.

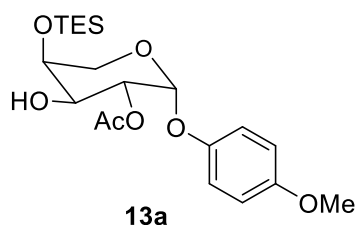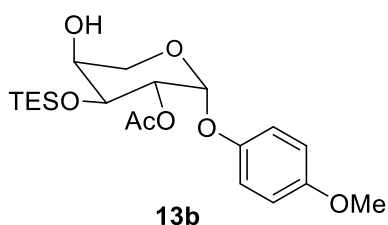

Trimethylsilyl trifluoromethanesulfonate (2.46 g, 11.06 mmol) in dichloromethane was slowly dropped into a solution of **12** (3.0 g, 10.06 mmol), triethylamine (1.22 g, 12.07 mmol) in dichloromethane (60 mL) at  $-78$  °C. The reaction mixture was stirred at this temperature for 2 hours. The reaction mixture was quenched with saturated ammonium chloride (30 mL), and the aqueous layer was extracted with dichloromethane (60 mL). The organic layer washed with saturated brine (40 mL). The combined organic layer was dried over  $\text{Na}_2\text{SO}_4$  and concentrated under reduced pressure. The residue was purified by column chromatography (Ethyl acetate – hexanes, 1: 4) giving the desired compound **13a** (1.2 g, 19%) and **13b** (2.4 g, 72%) as a yellow oil. **13a**:  $^1\text{H}$  NMR (600 MHz,  $\text{CDCl}_3$ )  $\delta$  6.99 (d,  $J = 9.0$  Hz, 2H,  $2 \times \text{ArH}$ ), 6.83 (d,  $J = 9.0$  Hz, 2H,  $2 \times \text{ArH}$ ), 5.54 (d,  $J = 3.0$  Hz, 1H, H-1), 5.12 (dd,  $J_1 = 9.6$  Hz,  $J_2 = 3.0$  Hz, 1H, H-2), 4.12-4.07 (m, 2H, H-3, H-4), 3.95 (d,  $J = 12.6$  Hz, 1H, H-6), 3.78 (s, 3H,  $\text{CH}_3\text{O}$ -), 3.69 (d,  $J = 12.6$  Hz, 1H, H-5), 2.25 (s, 1H,  $\text{OH}$ ), 2.15 (s, 3H,  $\text{CH}_3$ ), 1.00 (t,  $J = 7.8$  Hz, 9H,  $\text{CH}_3\text{CH}_2$ -), 0.67 (q,  $J = 7.8$  Hz, 6H,  $\text{CH}_3\text{CH}_2$ -);  $^{13}\text{C}$  NMR (100 MHz,  $\text{CDCl}_3$ )  $\delta$  171.2, 155.1, 150.8, 118.0, 114.6, 96.5, 71.3, 70.6, 67.9, 63.8, 55.6, 21.0, 6.7, 4.9. **13b**:  $^1\text{H}$  NMR (600 MHz,  $\text{CDCl}_3$ )  $\delta$  6.99 (d,  $J = 9.0$  Hz, 2H,  $2 \times$

ArH), 6.83 (d,  $J = 9.0$  Hz, 2H,  $2 \times$  ArH), 5.54 (d,  $J = 3.0$  Hz, 1H, H-1), 5.16 (dd,  $J_1 = 9.6$  Hz,  $J_2 = 3.0$  Hz, 1H, H-2), 4.32 (dd,  $J_1 = 14.4$  Hz,  $J_2 = 5.4$  Hz, 1H, H-4), 3.97-3.92 (m, 2H, H-3, H-6), 3.85 (dd,  $J_1 = 18.6$  Hz,  $J_2 = 2.4$  Hz, 1H, H-5), 3.77 (s, 3H, CH<sub>3</sub>O-), 2.79 (d,  $J = 2.4$  Hz, 1H, OH), 2.15 (s, 3H, CH<sub>3</sub>-), 1.01 (t,  $J = 7.8$  Hz, 9H, CH<sub>3</sub>CH<sub>2</sub>-), 0.68 (q,  $J = 7.8$  Hz, 6H, CH<sub>3</sub>CH<sub>2</sub>-); <sup>13</sup>C NMR (100 MHz, CDCl<sub>3</sub>)  $\delta$  171.2, 155.1, 150.8, 117.9, 114.6, 96.5, 71.3, 70.6, 67.9, 63.8, 55.6, 21.0, 6.6, 4.8. HRMS(ESI)  $m/z$  calcd for C<sub>20</sub>H<sub>32</sub>O<sub>7</sub>Si ([M+Na<sup>+</sup>]): 435.5432, found 435.5439.

**Table S3** Optimization of the glycosylation reaction.

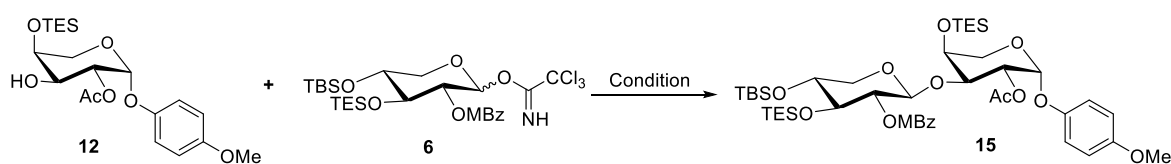

| Entry    | Acid                                        | 4Å MS         | Solvent    | Temperature  | Yield      |
|----------|---------------------------------------------|---------------|------------|--------------|------------|
| 1        | 0.1eq TMSOTf                                | Powder        | DCM        | -78°C        | 46%        |
| 2        | 0.3eq TMSOTf                                | Powder        | DCM        | -78°C        | 36%        |
| 3        | 0.1eq BF <sub>3</sub> ·Et <sub>2</sub> O    | Powder        | DCM        | -78°C        | 72%        |
| 4        | 0.05eq BF <sub>3</sub> ·Et <sub>2</sub> O   | Powder        | DCM        | -78°C        | 54%        |
| 5        | 0.3eq BF <sub>3</sub> ·Et <sub>2</sub> O    | Powder        | DCM        | -78°C        | 56%        |
| 6        | 0.1eq BF <sub>3</sub> ·Et <sub>2</sub> O    | Beads         | DCM        | -78°C        | 41%        |
| <b>7</b> | <b>0.1eq BF<sub>3</sub>·Et<sub>2</sub>O</b> | <b>Powder</b> | <b>DCM</b> | <b>-60°C</b> | <b>78%</b> |
| 8        | 0.1eq BF <sub>3</sub> ·Et <sub>2</sub> O    | Powder        | DCM        | -25°C        | 37%        |

Reaction condition: BF<sub>3</sub>·Et<sub>2</sub>O (0.1 eq), 4Å MS, DCM, -60°C, 1.5h

Generally, the catalytic amount of TMSOTf and BF<sub>3</sub>·Et<sub>2</sub>O are typical for glycosylation. For optimization of the glycosylation reaction, we used compound **12** (donor) and compound **6** (acceptor) as standard substrates (Table S3). Initially, we tested different equivalents of TMSOTf, and only obtained a low yield of compound **15** (Entries 1 and 2). Fortunately, 0.1 equivalent of BF<sub>3</sub>·Et<sub>2</sub>O at -78°C produced the required compound **15** in a yield of 72% (Entry 3). Next, the different equivalent of BF<sub>3</sub>·Et<sub>2</sub>O was screened, and no matter increases or decreases the equivalent, the yield of compound **15** remained poor (Entries 4-5). Replacing the 4Å MS powder with 4Å MS beads resulted in an extremely less efficient reaction (Entry 6). Moreover, raising the temperature from -78°C to -60°C increased the yield of compound **15** to 78% (Entry 7). Unfortunately, the

temperature cannot be raised to  $-25^{\circ}\text{C}$ , which can decrease the yield of compound **15** to 37% (Entry 8).

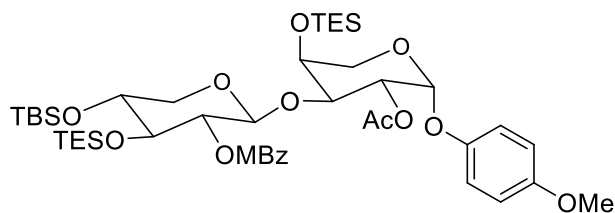

**15**

**Method 1:** The acceptor **7** (900 mg, 1.38 mmol), donor **13a** (200 mg, 0.46 mmol) and 4Å MS powder (300 mg) were dissolved in dry dichloromethane (10 mL). The reaction mixture was stirred at room temperature for 2 hours, and then cold down to  $-60^{\circ}\text{C}$ . Boron trifluoride diethyl etherate (17  $\mu\text{L}$ , 0.05 mmol) in dichloromethane was slowly dropped into this mixture and stirred at  $-60^{\circ}\text{C}$  for 3 hours. The reaction mixture was quenched with triethylamine and filtered 4Å MS. The organic solvent was concentrated under reduced pressure. The residue was purified by column chromatography (ethyl acetate-hexanes, 1: 4) giving the desired compound **15** (326 mg, 78%) as a yellow oil.  $^1\text{H}$  NMR (400 MHz,  $\text{CDCl}_3$ )  $\delta$  7.96 (d,  $J = 8.8$  Hz, 2H,  $2 \times \text{ArH}$ ), 6.88 (d,  $J = 8.0$  Hz, 4H,  $4 \times \text{ArH}$ ), 6.77 (d,  $J = 9.2$  Hz, 2H,  $2 \times \text{ArH}$ ), 5.53 (d,  $J = 3.2$  Hz, 1H, H-1'), 5.09 (dd,  $J_1 = 10.0$  Hz,  $J_2 = 3.6$  Hz, 1H), 5.03 (t,  $J = 8.0$  Hz, 1H), 4.79 (d,  $J = 7.2$  Hz, 1H), 4.17 (s, 1H), 4.11 (dd,  $J_1 = 9.6$  Hz,  $J_2 = 2.8$  Hz, 1H), 3.96 (dd,  $J_1 = 11.6$  Hz,  $J_2 = 4.8$  Hz, 1H), 3.89-3.69 (m, 10H), 3.54 (dd,  $J_1 = 11.6$  Hz,  $J_2 = 2.4$  Hz, 1H), 3.29 (dd,  $J_1 = 11.6$  Hz,  $J_2 = 9.6$  Hz, 1H), 1.78 (s, 3H), 0.98 (t,  $J = 8.0$  Hz, 9H), 0.91 (s, 9H), 0.86 (t,  $J = 8.0$  Hz, 9H), 0.68-0.61 (m, 6H), 0.56-0.49 (m, 6H), 0.14 (s, 3H), 0.12 (s, 3H).  $^{13}\text{C}$  NMR (100 MHz,  $\text{CDCl}_3$ )  $\delta$  170.0, 164.5, 163.3, 154.9, 150.7, 131.6, 122.8, 117.9, 114.5, 113.4, 102.5, 96.1, 75.7, 74.6, 71.9, 70.5, 65.9, 64.7, 55.8, 55.3, 25.9, 20.5, 18.1, 6.8, 6.7, 5.1, 4.8, -4.0, -4.6. HRMS(ESI)  $m/z$  calcd for  $\text{C}_{45}\text{H}_{74}\text{O}_{13}\text{Si}_3$  ( $[\text{M}+\text{H}^+]$ ): 908.3365, found 908.3371.



**Table S4** Optimization of the glycosylation reaction.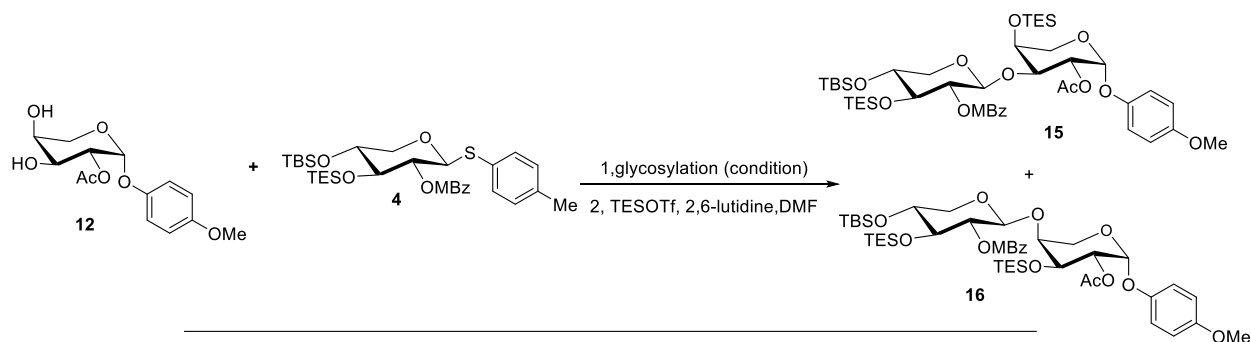

| Entry    | Acid                                         | NIS/NBS    | Compound 4   | Temperature  | Yield                         |
|----------|----------------------------------------------|------------|--------------|--------------|-------------------------------|
| 1        | 0.1eq BF <sub>3</sub> ·Et <sub>2</sub> O     | NIS        | 2.0eq        | -60°C        | 50% <b>15</b> + 15% <b>16</b> |
| 2        | 0.1eq BF <sub>3</sub> ·Et <sub>2</sub> O     | NBS        | 2.0eq        | -60°C        | 31% <b>15</b> + 12% <b>16</b> |
| 3        | 0.1eq BF <sub>3</sub> ·Et <sub>2</sub> O     | NIS        | 2.0eq        | -78°C        | 46% <b>15</b> + 11% <b>16</b> |
| 4        | 0.1eq BF <sub>3</sub> ·Et <sub>2</sub> O     | NIS        | 2.0eq        | -40°C        | 56% <b>15</b> + 20% <b>16</b> |
| 5        | 0.3eq BF <sub>3</sub> ·Et <sub>2</sub> O     | NIS        | 2.0eq        | -40°C        | 41% <b>15</b> + 14% <b>16</b> |
| 6        | 0.05eq BF <sub>3</sub> ·Et <sub>2</sub> O    | NIS        | 2.0eq        | -40°C        | 59% <b>15</b> + 18% <b>16</b> |
| <b>7</b> | <b>0.05eq BF<sub>3</sub>·Et<sub>2</sub>O</b> | <b>NIS</b> | <b>3.0eq</b> | <b>-40°C</b> | <b>68% 15 + 16% 16</b>        |
| 8        | 0.05eq BF <sub>3</sub> ·Et <sub>2</sub> O    | NIS        | 4.0eq        | -40°C        | 61% <b>15</b> + 14% <b>16</b> |
| 9        | 0.05eq BF <sub>3</sub> ·Et <sub>2</sub> O    | NIS        | 3.0eq        | -25°C        | 56% <b>15</b> +23% <b>16</b>  |

Reaction condition: a, NIS(3.0eq), BF<sub>3</sub>·Et<sub>2</sub>O (0.05eq), 4Å MS, DCM, -40°C, 4h; b, TESOTf (1.5 eq), 2,6-lutidine (2.0 eq), room temperature, DMF, 2h

For optimization of the one pot of glycosylation reaction, we used compound **12** (Acceptor) and compound **4** (Donor) as standard substrates (Table S4). First, we used the optimal reaction condition in Table S3, entry 7. Unfortunately, 0.1 equivalent of BF<sub>3</sub>·Et<sub>2</sub>O and 3.0 equivalent of NBS generated just a 16% yield of compound **15** (Entry 1). Replacing the NBS with NIS resulted in an extremely improved yield of the product (Entry 2). The yield of the product decreased when the temperature was lowered to -78°C, while the ratio of compound **15** to compound **16** increased to 3:1 (Entry 3). Fortunately, raising the temperature to -40°C, the yield of compound **15** was increased to 55% (Entry 4). Next, a brief equivalent of BF<sub>3</sub>·Et<sub>2</sub>O screening was undertaken, and the high equivalent of BF<sub>3</sub>·Et<sub>2</sub>O resulted in a low yield of the product (Entry 5). Additionally, we found various byproducts on TLC plate staining. We guess the TBS and TES group on xylose part were likely to be deprotected by the high equivalent of BF<sub>3</sub>·Et<sub>2</sub>O, and these byproducts will be glycosylated with compound **4**. The yield of product increased when the equivalent of BF<sub>3</sub>·Et<sub>2</sub>O was reduced to 0.05 equivalent (Entry 6). Moreover, increasing the equivalent of compound **4**

exhibited that both yield and the ratio of the product are increased (Entries 7 and 8). Unfortunately, the reaction temperature raised to  $-25^{\circ}\text{C}$ , the yield and the ratio of product both decreased (Entry 9).

**Method 2:** The acceptor **4** (1.55 g, 2.5 mmol), donor **12** (400 mg, 1.25 mmol) and 4Å MS powder (500 mg) were dissolved in dry dichloromethane (20 mL). The reaction mixture was stirred at room temperature for 2 hours, and then cold down to  $-60^{\circ}\text{C}$ . Boron trifluoride diethyl etherate (17  $\mu\text{L}$ , 0.05 mmol) and N-iodosuccinimide (675 mg, 3.0 mmol) in dichloromethane was slowly dropped into this mixture and stirred at  $-60^{\circ}\text{C}$  for 3 hours. The reaction mixture was quenched with triethylamine (500 mg, 5.0 mmol) and then triethylsilyl trifluoromethanesulfo-nate (600 mg, 2.5 mmol) in dichloromethane was slowly dropped into this reaction. The mixture was stirred at this temperature for 2 hours. The reaction mixture was quenched with saturated ammonium chloride (20 mL), and the aqueous layer was extracted with dichloromethane (20 mL). The organic layer washed with saturated brine (10 mL). The combined organic layer was dried over  $\text{Na}_2\text{SO}_4$  and concentrated under reduced pressure. The residue was purified by column chromatography (ethyl acetate –hexanes, 1: 4) giving the desired compound **15** (738 mg, 65%) as a yellow oil.  $^1\text{H}$  NMR (400 MHz,  $\text{CDCl}_3$ )  $\delta$  7.96 (d,  $J = 8.8$  Hz, 2H,  $2 \times \text{ArH}$ ), 6.88 (d,  $J = 8.0$  Hz, 4H,  $4 \times \text{ArH}$ ), 6.77 (d,  $J = 9.2$  Hz, 2H,  $2 \times \text{ArH}$ ), 5.53 (d,  $J = 3.2$  Hz, 1H, H-1'), 5.09 (dd,  $J_1 = 10.0$  Hz,  $J_2 = 3.6$  Hz, 1H), 5.03 (t,  $J = 8.0$  Hz, 1H), 4.79 (d,  $J = 7.2$  Hz, 1H), 4.17 (s, 1H), 4.11 (dd,  $J_1 = 9.6$  Hz,  $J_2 = 2.8$  Hz, 1H), 3.96 (dd,  $J_1 = 11.6$  Hz,  $J_2 = 4.8$  Hz, 1H), 3.89-3.69 (m, 10H), 3.54 (dd,  $J_1 = 11.6$  Hz,  $J_2 = 2.4$  Hz, 1H), 3.29 (dd,  $J_1 = 11.6$  Hz,  $J_2 = 9.6$  Hz, 1H), 1.78 (s, 3H), 0.98 (t,  $J = 8.0$  Hz, 9H), 0.91 (s, 9H), 0.86 (t,  $J = 8.0$  Hz, 9H), 0.68-0.61 (m, 6H), 0.56-0.49 (m, 6H), 0.14 (s, 3H), 0.12 (s, 3H).  $^{13}\text{C}$  NMR (100 MHz,  $\text{CDCl}_3$ )  $\delta$  170.0, 164.5, 163.3, 154.9, 150.7, 131.6, 122.8, 117.9, 114.5, 113.4, 102.5, 96.1, 75.7, 74.6, 71.9, 70.5, 65.9, 64.7, 55.8, 55.3, 25.9, 20.5, 18.1, 6.8, 6.7, 5.1, 4.8, -4.0, -4.6. HRMS(ESI)  $m/z$  calcd for  $\text{C}_{45}\text{H}_{74}\text{O}_{13}\text{Si}_3$  ( $[\text{M}+\text{H}^+]$ ): 908.3365, found 908.3371.

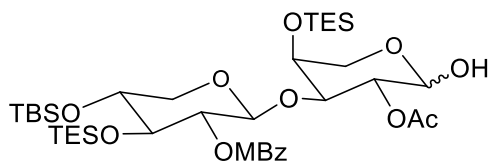

**17**

Ammonium cerium (IV) nitrate (1.09 g, 1.98 mmol) was added into a solution of **15** (1.2 g, 1.32 mmol) in acetonitrile /H<sub>2</sub>O (40 mL, 4:1). The reaction mixture was stirred at this temperature for 10 mins. The reaction mixture was quenched with saturated NaHCO<sub>3</sub> (20 mL), and the aqueous layer was extracted with dichloromethane (60 mL). The organic layer washed with saturated brine (30 mL). The combined organic layer was dried over Na<sub>2</sub>SO<sub>4</sub> and concentrated under reduced pressure. The residue was purified by column chromatography (ethyl acetate - hexanes, 1: 4) and gave desired compound **17** (677 mg, 64%) as yellow oil. <sup>1</sup>H NMR (400 MHz, CDCl<sub>3</sub>) δ 7.97 (d, *J* = 8.8 Hz, 2H, 2 × Ar*H*), 6.90 (d, *J* = 8.8 Hz, 2H, 2 × Ar*H*), 5.21 (s, 1H), 4.99 (t, *J* = 3.6 Hz, 1H), 4.95-4.88 (m, 1H), 4.71 (d, *J* = 6.8 Hz, 1H), 4.06 (s, 1H), 3.98-3.95 (m, 2H), 3.92-3.85 (m, 6H), 3.79-3.75 (m, 2H), 3.71-3.66 (m, 2H), 3.54 (dd, *J*<sub>1</sub> = 11.6 Hz, *J*<sub>2</sub> = 3.6 Hz, 1H), 3.22 (dd, *J*<sub>1</sub> = 11.6 Hz, *J*<sub>2</sub> = 8.8 Hz, 1H), 2.81 (d, *J* = 4.8 Hz, 1H), 1.87 (s, 3H), 0.96-0.84 (m, 27H), 0.68-0.62 (m, 6H), 0.61-0.53 (m, 6H), 0.14 (s, 3H), 0.12 (s, 3H); <sup>13</sup>C NMR (100 MHz, CDCl<sub>3</sub>) δ 170.0, 164.6, 163.4, 163.3, 131.9, 131.7, 122.7, 122.3, 113.5, 113.4, 101.9, 90.9, 77.2, 75.2, 74.5, 73.9, 71.6, 70.9, 65.5, 64.2, 55.4, 25.9, 25.8, 20.6, 18.1, 6.8, 6.7, 5.1, 4.7, -4.1, -4.6. HRMS(ESI) *m/z* calcd for C<sub>38</sub>H<sub>68</sub>O<sub>12</sub>Si<sub>3</sub> ([M+H<sup>+</sup>]): 802.2125, found 802.2129.

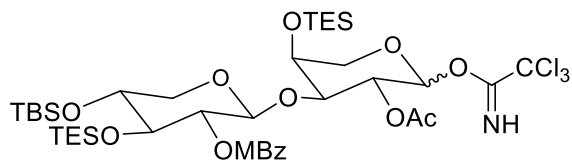

**18**

1,8-diazabicyclo[5.4.0]undec-7-ene (43 mg, 0.28 mmol) was added into a solution of **17** (0.9 g, 1.12 mmol), trichloroacetonitrile (0.8 g, 5.6 mmol) in dry dichloromethane (20 mL). The reaction mixture was stirred at this temperature overnight. The reaction mixture was concentrated under reduced pressure. The residue was purified by column chromatography (ethyl acetate-hexanes-

triethylamine, 1: 4:0.1) giving the desired compound **18** (942 mg, 89%) as yellow oil. <sup>1</sup>H NMR (400 MHz, CDCl<sub>3</sub>) δ 8.50 (s, 1H), 7.96 (d, *J* = 8.4 Hz, 2H, 2 × *ArH*), 6.90 (d, *J* = 8.8 Hz, 2H, 2 × *ArH*), 6.42 (d, *J* = 3.2 Hz, 1H), 5.18 (dd, *J*<sub>1</sub> = 10.4 Hz, *J*<sub>2</sub> = 3.6 Hz, 1H), 4.99 (t, *J* = 7.6 Hz, 1H), 4.72 (d, *J* = 7.2 Hz, 1H), 4.21 (s, 1H), 4.01-3.93 (m, 3H), 3.87 (s, 3H), 3.84-3.76 (m, 2H), 3.73-3.65 (m, 2H), 3.25 (dd, *J*<sub>1</sub> = 11.6 Hz, *J*<sub>2</sub> = 9.2 Hz, 1H), 1.66 (s, 3H), 0.97 (t, *J* = 8.0 Hz, 9H), 0.92 (s, 9H), 0.88-0.84 (m, 9H), 0.68-0.63 (m, 6H), 0.55-0.49 (m, 6H), 0.13 (s, 3H), 0.12 (s, 3H); <sup>13</sup>C NMR (100 MHz, CDCl<sub>3</sub>) δ 169.7, 164.4, 163.3, 160.9, 131.7, 122.8, 113.5, 102.7, 94.9, 91.2, 77.2, 75.5, 74.8, 74.1, 71.8, 70.2, 69.4, 66.6, 65.8, 55.4, 25.9, 20.2, 18.1, 6.9, 6.8, 5.1, 4.8, -4.0, -4.6.

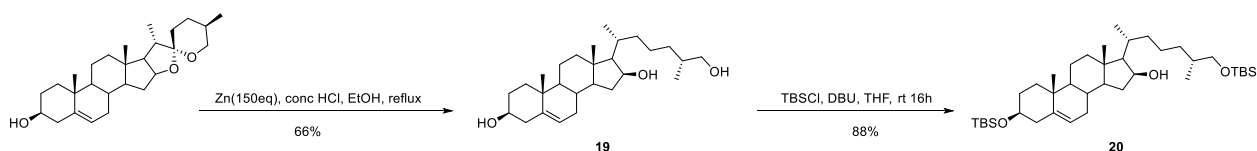

*tert*-Butyldimethylsilyl chloride (0.9 g, 5.98 mmol) in dichloromethane was slowly dropped into a solution of **19**<sup>[1]</sup> (1.0 g, 2.39 mmol), 1,8-diazabicyclo [5.4.0]undec-7-ene (1.46 g, 9.55 mmol), 4-(dimethylamino)-pyridine (60 mg, 4.78 mmol) in dichloromethane (25 mL). The reaction mixture was stirred at this temperature for 2 hours. The reaction mixture was quenched with saturated ammonium chloride (40 mL), and the aqueous layer was extracted with dichloromethane (60 mL). The organic layer was washed with saturated brine (40 mL). The combined organic layer was dried over Na<sub>2</sub>SO<sub>4</sub> and concentrated under reduced pressure. The residue was purified by column chromatography (ethyl acetate –hexanes, 1: 4) gave desired compound **20** (1.36 g, 88%) as a yellow oil. <sup>1</sup>H NMR (400 MHz, CDCl<sub>3</sub>) δ 5.32 (d, *J* = 5.2 Hz, 1H, -CH=C), 4.37-4.34 (m, 1H, CH-OSi), 3.52-3.47 (m, 1H, CH-O), 3.44 (dd, *J*<sub>1</sub> = 9.6 Hz, *J*<sub>2</sub> = 6.0 Hz, 1H, CH<sub>2</sub>-OSi), 3.36 (dd, *J*<sub>1</sub> = 9.6 Hz, *J*<sub>2</sub> = 6.4 Hz, 1H, CH<sub>2</sub>-OSi), 2.31-2.15 (m, 3H), 2.03-1.97 (m, 2H), 1.87-1.78 (m, 2H), 1.74-1.71 (m, 1H), 1.62-1.47 (m, 6H), 1.44-1.27 (m, 4H), 1.22-0.98 (m, 12H), 0.92-0.85 (m, 24H), 0.06 (s, 6H, CH<sub>3</sub>Si-), 0.04 (s, 6H, CH<sub>3</sub>Si-); <sup>13</sup>C NMR (100 MHz, CDCl<sub>3</sub>) δ 141.7, 120.9, 72.6, 72.5, 68.5, 61.4, 54.6, 50.2, 42.8, 42.8, 42.2, 39.9, 37.3, 36.6, 36.3, 35.8, 33.6, 32.1, 31.8, 31.5, 29.8, 26.0, 25.9, 25.6, 23.8, 20.7, 19.4, 18.4, 18.3, 18.2, 16.7, 13.0, -4.5, -4.6, -5.3, -5.4. HRMS(ESI) *m/z* calcd for C<sub>39</sub>H<sub>74</sub>O<sub>3</sub>Si<sub>2</sub> ([M+Na<sup>+</sup>]): 670.1772, found 670.1766.

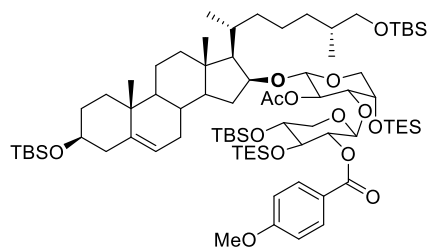

21

Trimethylsilyl trifluoromethanesulfonate (5  $\mu$ L, 0.03 mmol) in dichloromethane was slowly dropped into a solution of **20** (850 mg, 0.9 mmol), donor **18** (200 mg, 0.3 mmol) in dry dichloromethane (10 mL) with 4Å MS at  $-60^{\circ}\text{C}$ . The reaction mixture was stirred at  $-40^{\circ}\text{C}$  for 3 hours. The reaction mixture was quenched with triethylamine (0.5 mL), and then diluted with dichloromethane (20 mL) then washed with saturated brine (10 mL). The combined organic layer was dried over  $\text{Na}_2\text{SO}_4$  and concentrated under reduced pressure. The residue was purified by column chromatography (ethyl acetate –hexanes, 1: 4) gave desired compound **21** (262 mg, 61%) as a white powder.  $^1\text{H}$  NMR (400 MHz,  $\text{CDCl}_3$ )  $\delta$  8.00 (d,  $J = 8.8$  Hz, 2H,  $2 \times \text{ArH}$ ), 6.89 (d,  $J = 8.8$  Hz, 2H,  $2 \times \text{ArH}$ ), 5.30 (d,  $J = 3.6$  Hz, 1H,  $-\text{CH}=\text{C}$ ), 5.03 (dd,  $J_1 = 3.2$  Hz,  $J_2 = 2.4$  Hz, 1H), 4.87-4.85 (m, 2H), 4.24 (d,  $J = 3.6$  Hz, 1H), 4.19-4.13 (m, 1H), 4.04-4.03 (m, 1H), 3.89-3.86 (m, 5H), 3.83 (t,  $J = 5.6$  Hz, 1H), 3.75-3.74 (m, 1H), 3.64-3.61 (m, 1H), 3.51-3.40 (m, 2H), 3.36-3.32 (m, 2H), 3.27 (dd,  $J_1 = 11.6$  Hz,  $J_2 = 6.4$  Hz, 1H), 2.28 (t,  $J = 12.0$  Hz, 1H), 2.19-2.10 (m, 2H), 2.00-1.96 (m, 2H), 1.91 (s, 3H), 1.85-1.68 (m, 4H), 1.56-1.38 (m, 8H), 1.32-1.14 (m, 8H), 1.01-0.81 (m, 70H), 0.67-0.56 (m, 12H), 0.09 (s, 3H), 0.06 (s, 9H), 0.04 (s, 6H), 0.03 (s, 3H).  $^{13}\text{C}$  NMR (100 MHz,  $\text{CDCl}_3$ )  $\delta$  168.6, 164.6, 163.2, 141.6, 131.9, 122.8, 121.1, 113.3, 81.9, 77.2, 72.7, 68.6, 60.8, 55.3, 54.9, 50.3, 42.8, 42.1, 39.6, 37.4, 36.6, 36.3, 36.1, 35.9, 34.04, 32.1, 31.9, 31.6, 31.5, 29.7, 39.6, 36.0, 25.9, 25.8, 20.9, 20.8, 19.3, 18.4, 18.3, 18.2, 18.1, 16.7, 13.0, 6.9, 6.8, 4.9, 4.8, -4.2, -4.5, -4.6, -4.7, -5.2, -5.3. HRMS(ESI)  $m/z$  calcd for  $\text{C}_{77}\text{H}_{140}\text{O}_{14}\text{Si}_5$  ( $[\text{M}+\text{H}^+]$ ): 1431.3855, found 1431.3851.

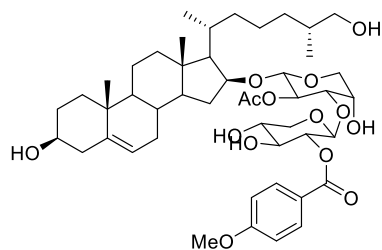

**WB-06**

Pd(CH<sub>3</sub>CN)Cl<sub>2</sub> (90 mg, 0.35 mmol) was added into a solution of **21** (200 mg, 0.14 mmol) in acetone/H<sub>2</sub>O (5 mL) at room temperature. The reaction mixture was stirred at room temperature overnight. The reaction mixture was quenched with triethylamine (0.5 mL), and then diluted with dichloromethane (20 mL) then washed with saturated brine (10 mL). The combined organic layer was dried over Na<sub>2</sub>SO<sub>4</sub> and concentrated under reduced pressure. The residue was purified by column chromatography (ethyl acetate –hexanes, 1: 4) and gave desired compound **WB-06** (102 mg, 85%) as a white powder. <sup>1</sup>H NMR (600 MHz, CDCl<sub>3</sub>) δ 7.91 (d, *J* = 9.0 Hz, 2H, 2 × *ArH*), 6.91 (d, *J* = 9.0 Hz, 2H, 2 × *ArH*), 5.22 (d, *J* = 4.2 Hz, 1H, -CH=C-), 4.93 (t, *J* = 7.8 Hz, 1H), 4.82 (t, *J* = 7.8 Hz, 1H), 4.73 (d, *J* = 7.8 Hz, 1H), 4.58 (d, *J* = 7.2 Hz, 1H), 4.12 (d, *J* = 7.2 Hz, 1H), 3.92 (s, 1H), 3.87-3.84 (m, 2H), 3.88-3.85 (m, 4H), 3.66 (dd, *J*<sub>1</sub> = 9.6 Hz, *J*<sub>2</sub> = 3.0 Hz, 1H), 3.55-3.49 (m, 2H), 3.42 (d, *J* = 12.6 Hz, 1H), 3.31-3.21 (m, 3H), 2.13-2.00 (m, 3H), 1.87-1.82 (m, 2H), 1.75-1.67 (m, 1H), 1.68-1.66 (m, 2H), 1.43 (s, 3H), 1.39-1.29 (m, 6H), 1.25-1.13 (m, 6H), 1.12-1.01 (m, 8H), 0.91-0.78 (m, 11H); <sup>13</sup>C NMR (100 MHz, CDCl<sub>3</sub>) δ 171.0, 167.1, 165.3, 142.3, 133.1, 123.6, 122.3, 114.8, 104.3, 103.9, 82.5, 81.2, 75.8, 75.3, 72.4, 72.1, 71.0, 69.8, 68.5, 66.7, 66.4, 62.1, 60.0, 56.3, 56.1, 51.7, 43.3, 43.0, 41.0, 38.5, 37.7, 37.6, 37.5, 36.9, 36.3, 35.3, 32.9, 32.3, 30.6, 23.6, 21.9, 21.0, 19.8, 18.7, 17.3, 13.2. HRMS(ESI) *m/z* calcd for C<sub>47</sub>H<sub>70</sub>O<sub>14</sub> ([M+H<sup>+</sup>]): 860.0705, found 860.0711.

**Cytotoxicity:** The human ileocecal adenocarcinoma (HCT-8) cell line was purchased from American Type Culture Collection (American Type Culture Collection, Manassas, VA, USA). HCT-8 cells were cultured in Dulbecco's modified Eagle's medium (DMEM, ATCC) supplemented with 10% and 100 units/mL (U/mL) penicillin/streptomycin and incubated in a humidified atmosphere (5% CO<sub>2</sub>) at 37 °C.

The human cervical cancer (Hela) cell line was purchased from American Type Culture Collection (American Type Culture Collection, Manassas, VA, USA). Hela cells were cultured in Dulbecco's modified Eagle's medium (DMEM, ATCC) supplemented with 10% and 100 units/mL (U/mL) penicillin/streptomycin and incubated in a humidified atmosphere (5% CO<sub>2</sub>) at 37 °C.

The human breast cancer (MDA-MB-231) cell line was purchased from American Type Culture Collection (American Type Culture Collection, Manassas, VA, USA). MDA-MB-231 cells were cultured in Dulbecco's modified Eagle's medium (DMEM, ATCC) supplemented with 10% and 100 units/mL (U/mL) penicillin/streptomycin and incubated in a humidified atmosphere (5% CO<sub>2</sub>) at 37 °C.

The human breast cancer (MCF-7) cell line was purchased from American Type Culture Collection (American Type Culture Collection, Manassas, VA, USA). MCF-7 cells were cultured in Dulbecco's modified Eagle's medium (DMEM, ATCC) supplemented with 10% and 100 units/mL (U/mL) penicillin/streptomycin and incubated in a humidified atmosphere (5% CO<sub>2</sub>) at 37 °C.

The human ovarian cancer (SKOV-3) cell line was purchased from American Type Culture Collection (American Type Culture Collection, Manassas, VA, USA). MCF-10A cells were cultured in Dulbecco's modified Eagle's medium (DMEM, ATCC) supplemented with 10% and 100 units/mL (U/mL) penicillin/streptomycin and incubated in a humidified atmosphere (5% CO<sub>2</sub>) at 37 °C.

The human epithelial (MCF-10A) cell line was purchased from American Type Culture Collection (American Type Culture Collection, Manassas, VA, USA). MCF-10A cells were cultured in Dulbecco's modified Eagle's medium (DMEM, ATCC) supplemented with 10% and 100 units/mL (U/mL) penicillin/streptomycin and incubated in a humidified atmosphere (5% CO<sub>2</sub>) at 37 °C.

The human microglia clone 3 cell line (HMC-3) was purchased from American Type Culture Collection (American Type Culture Collection, Manassas, VA, USA). HMC<sub>3</sub> cells were cultured

in Eagle's Minimum Essential Media (EMEM, ATCC) supplemented with 10% and 100 units/mL (U/mL) penicillin/streptomycin and incubated in a humidified atmosphere (5% CO<sub>2</sub>) at 37 °C.

**AlamarBlue Cytotoxicity Assay:** Cytotoxicity was evaluated using an alamarBlue (Sigma-Aldrich) assay. Cells were plated into a 96 well plate at a concentration of 5000 cells/well in medium with 10% fetal bovine serum (FBS) at 37 °C and 5% CO<sub>2</sub>, and 24 h later, the cells were incubated with **WB-06** at different concentrations for 72 h. Taking out old medium after 72 h. Then medium/alamarBlue (10:1) fresh solution was added and incubated for 2-3 h. The absorbance (A) at a wavelength of 570 nm was measured with a Bio-Rad microplate reader. The relative cell viability (%) was calculated by  $(A_{\text{sample}}/A_{\text{control}}) \times 100 \%$ . All samples were done in triplicate and the experiment was replicated three times.



## Reference

1. [a] Williams, J. R.; Chai, D.; Wright, D. *Steroids* 2002, **67**, 1041-1044. [b] D Zheng.; Y Guan.; X Chen.; Y Xu.; X Chen.; P Lei. *Bioorg.Med. Chem. Lett.* 2011, **21**, 3257–3260. [c] C Liu.; A Wang.; L Jin.; Y Guo.; Y Li.; Z Zhao.; P Lei. *Tetrahedron* 2016,**72**, 4091-4102.

WB-04-37

7.438  
7.425  
7.270  
7.190  
7.127

4.530  
4.515  
3.993  
3.985  
3.974  
3.956  
3.628  
3.620  
3.542  
3.529  
3.515  
3.391  
3.377  
3.269  
3.255  
2.349

0.867  
0.114  
0.086

**Figure S1.**  $^1\text{H}$  NMR of compound **2a**

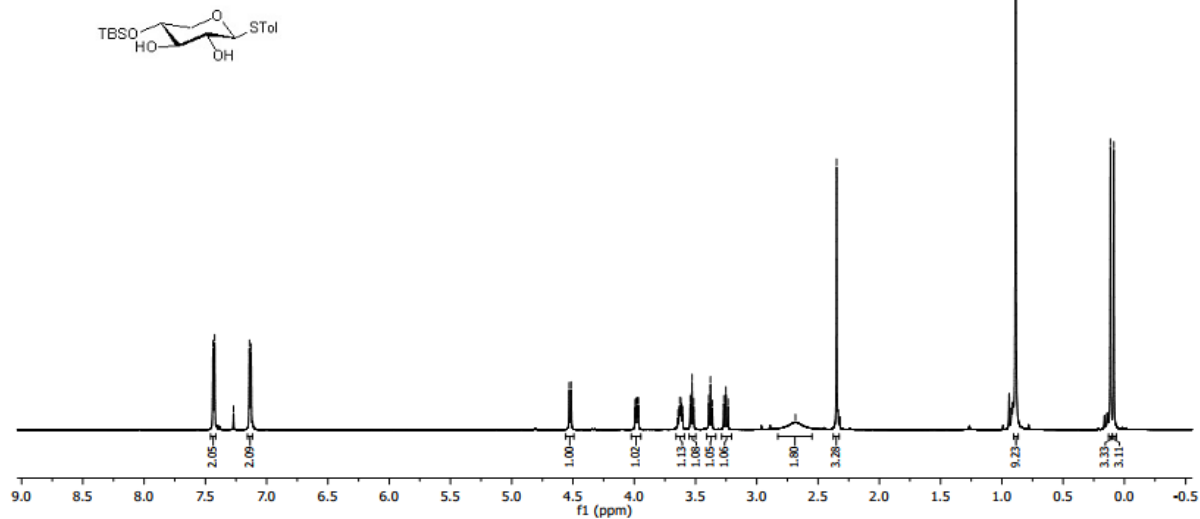

WB-04-37

138.366  
133.197  
129.794  
128.199

88.974  
77.499  
77.312  
77.100  
76.788  
71.685  
70.594

25.671  
21.120  
17.994

4.684  
4.722

**Figure S1.**  $^{13}\text{C}$  NMR of compound **2a**

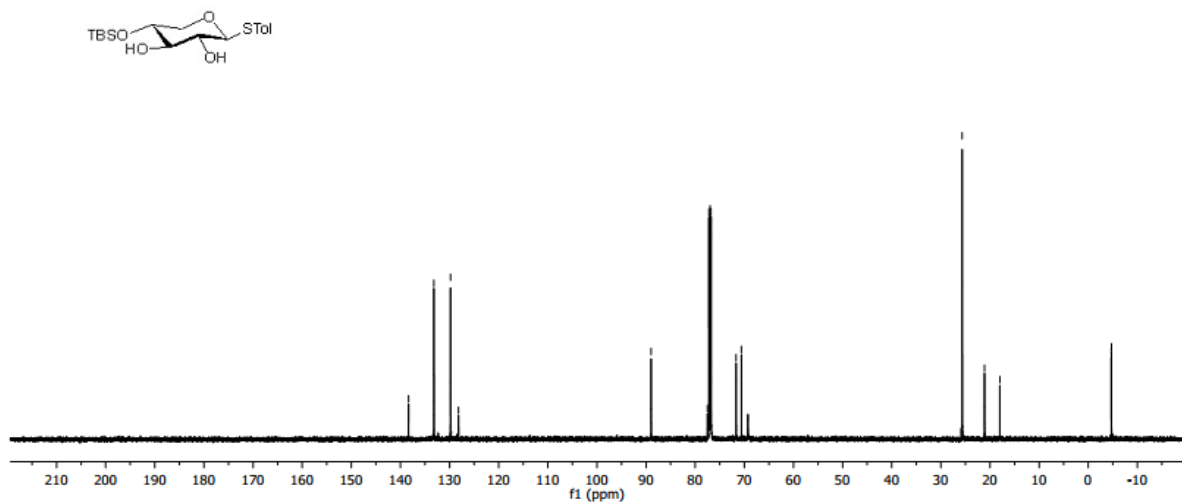

Figure S1. COSY NMR of compound 2a

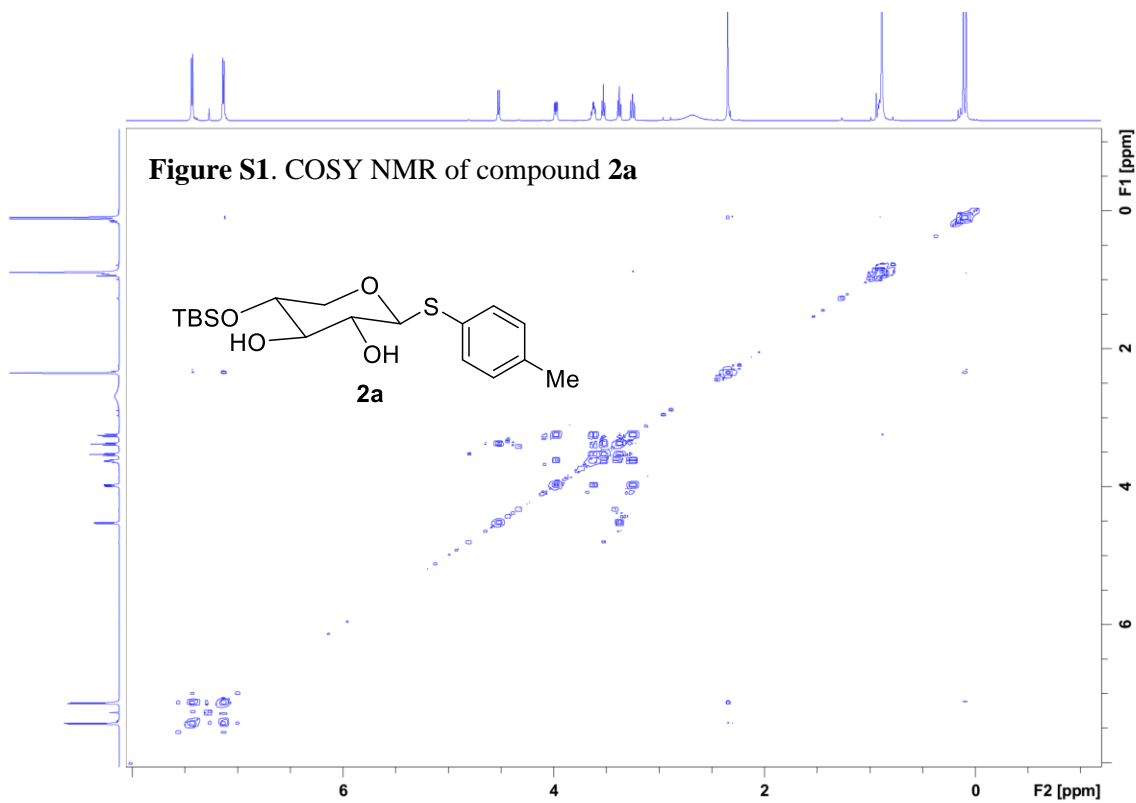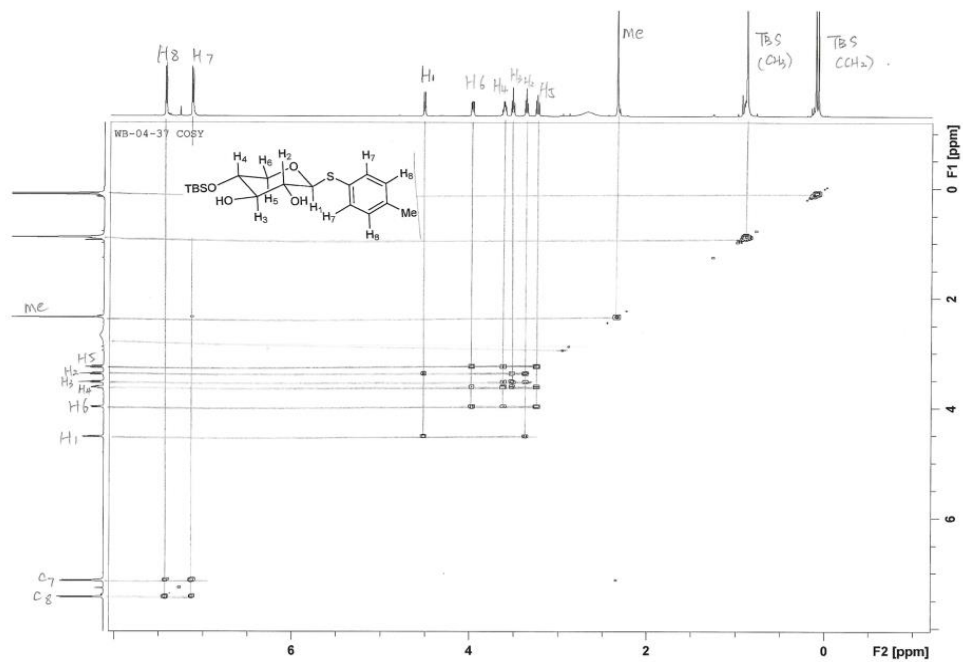

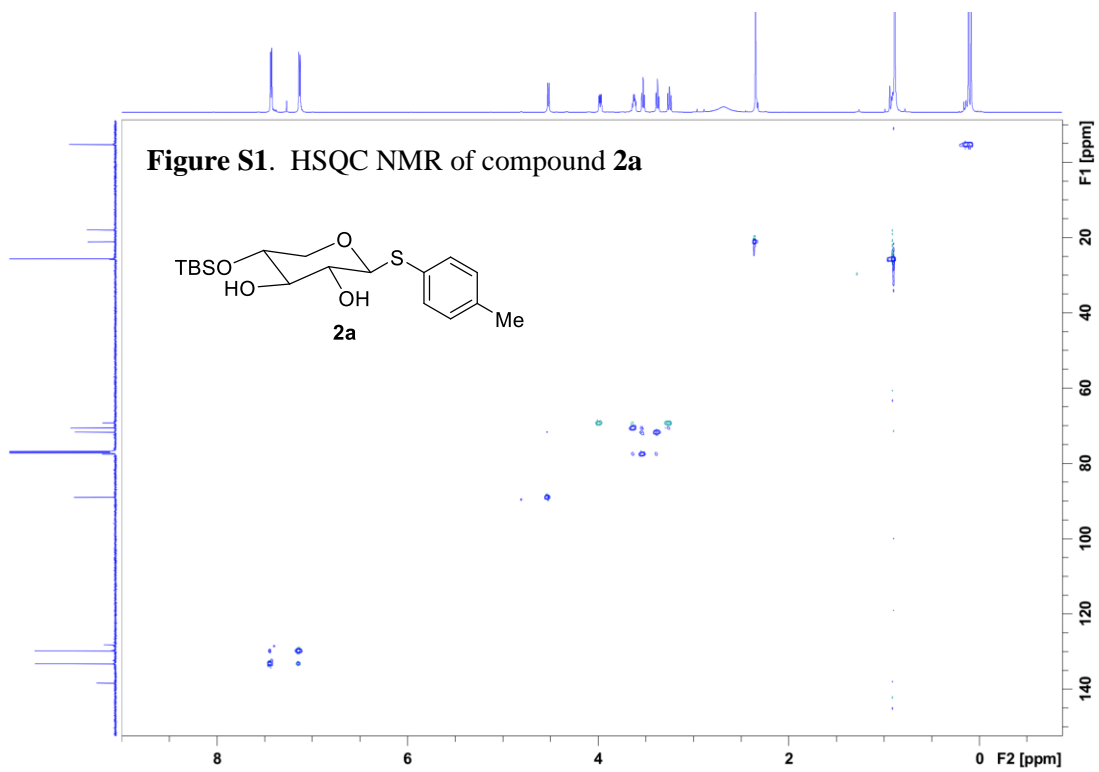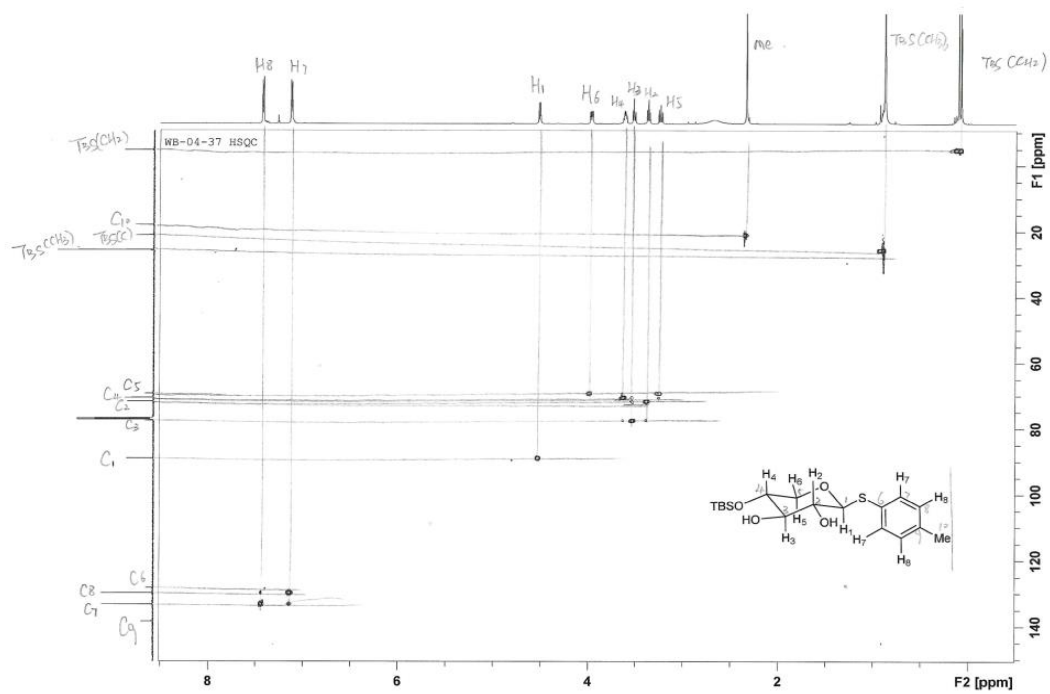

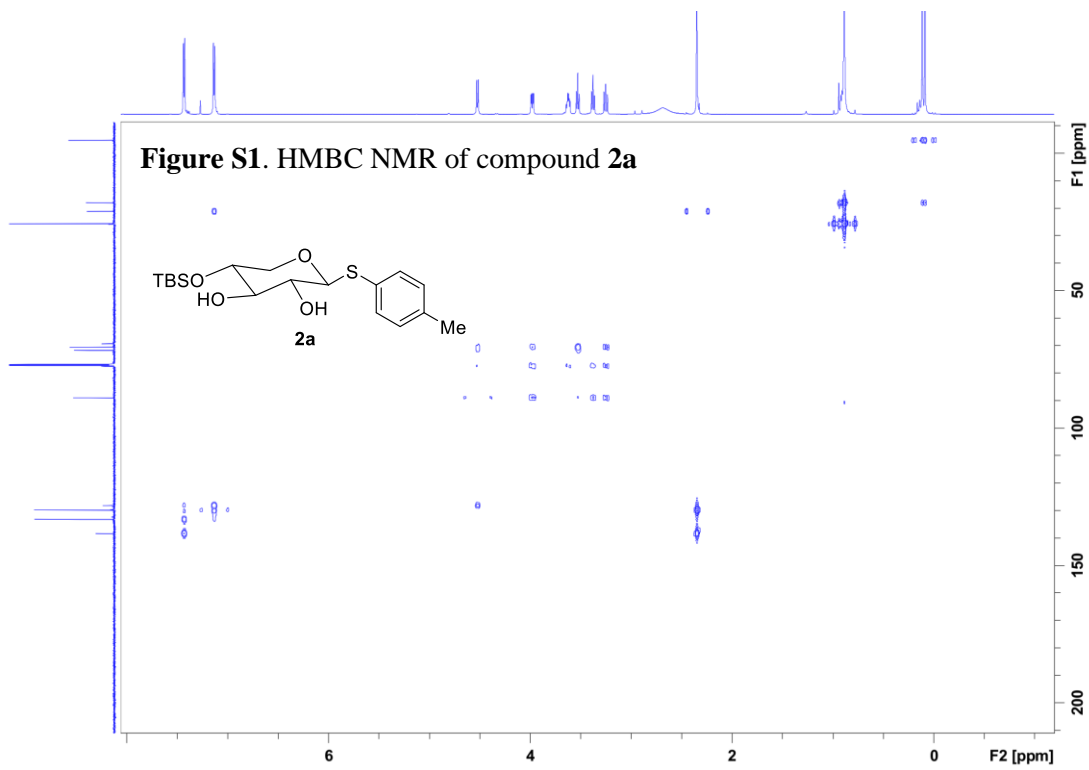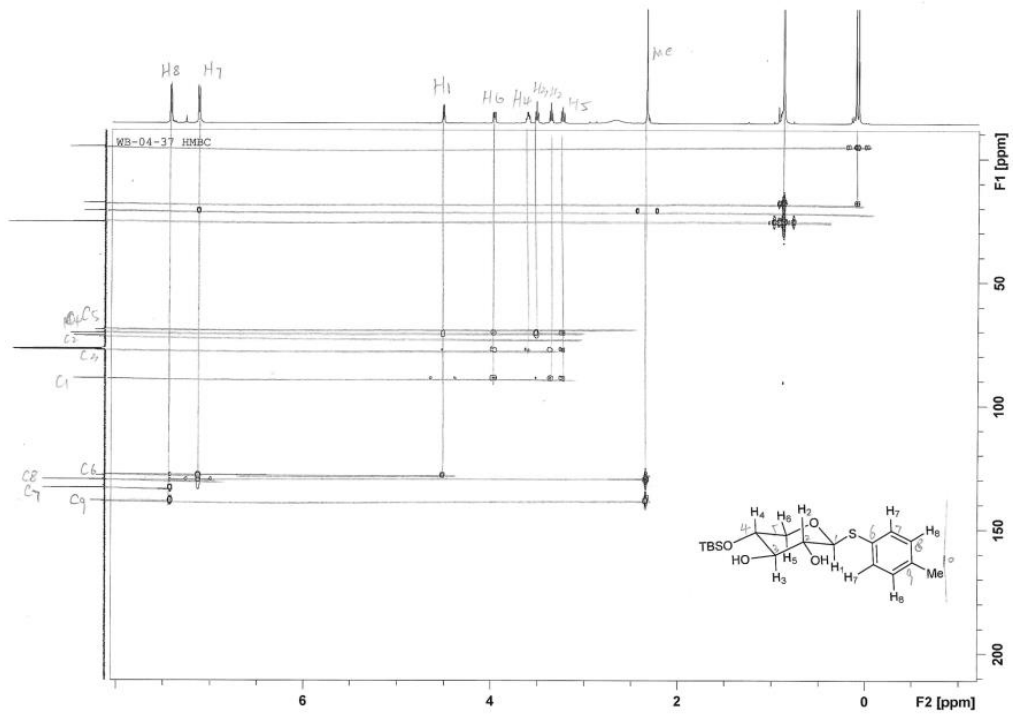

WB-05-31

7.000  
7.287  
7.270  
7.145  
7.132  
5.684  
5.676  
5.666  
5.957  
5.947  
5.938  
5.929  
5.919  
5.479  
5.471  
5.411  
5.323  
5.306  
4.688  
4.688  
4.675  
4.656  
4.117  
4.099  
3.987  
3.980  
3.968  
3.959  
3.909  
3.900  
3.894  
3.885  
3.875  
3.860  
3.805  
2.394

Figure S1.  $^1\text{H}$  NMR of compound **2b**

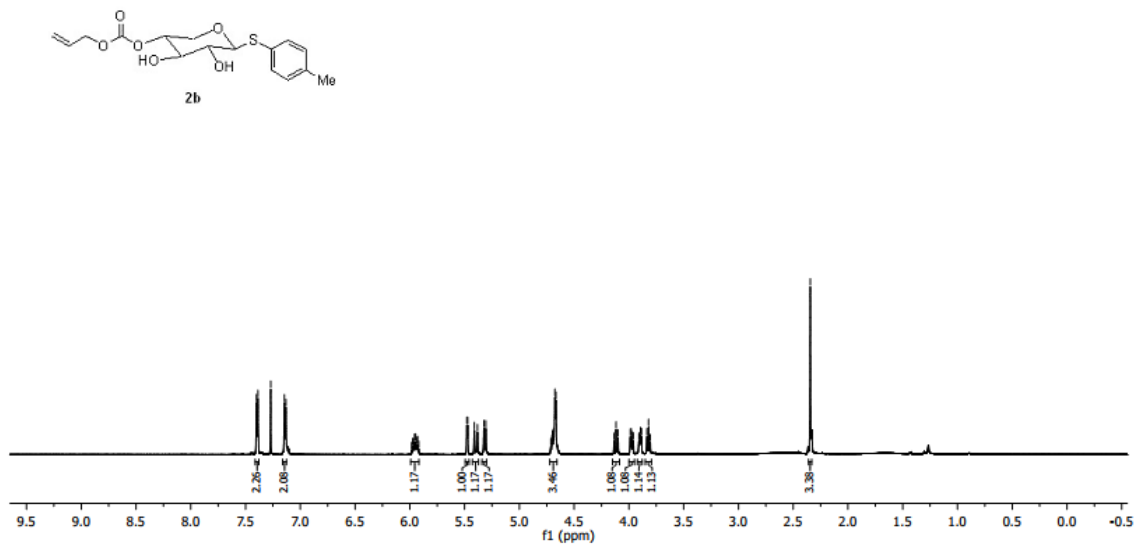

WB-05-31

177542  
154424  
138143  
133432  
131028  
128970  
119454  
80.567  
77.212  
77.000  
76.788  
74.444  
72.544  
72.058  
69.047  
60.259  
21.100

Figure S1.  $^{13}\text{C}$  NMR of compound **2b**

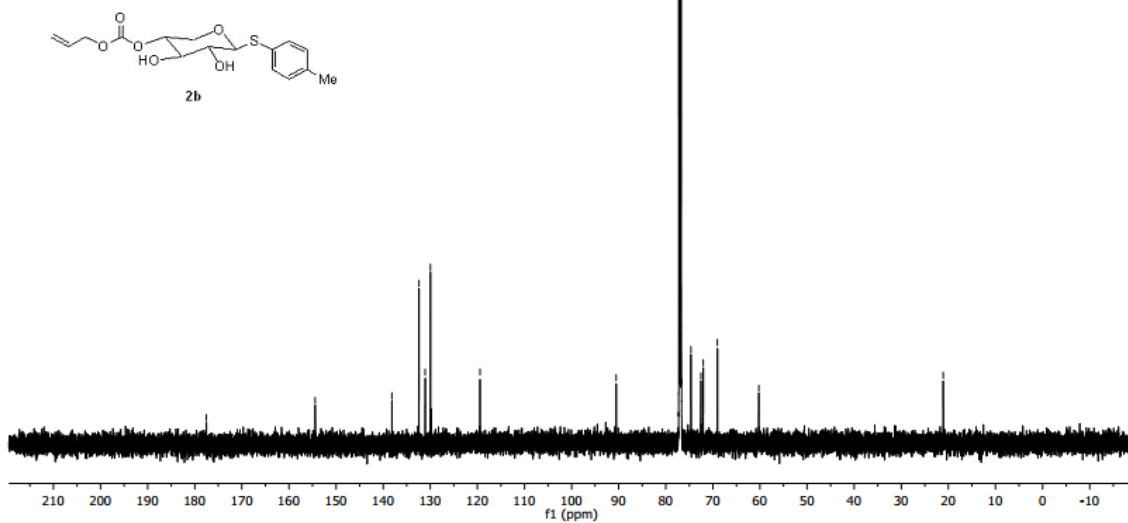

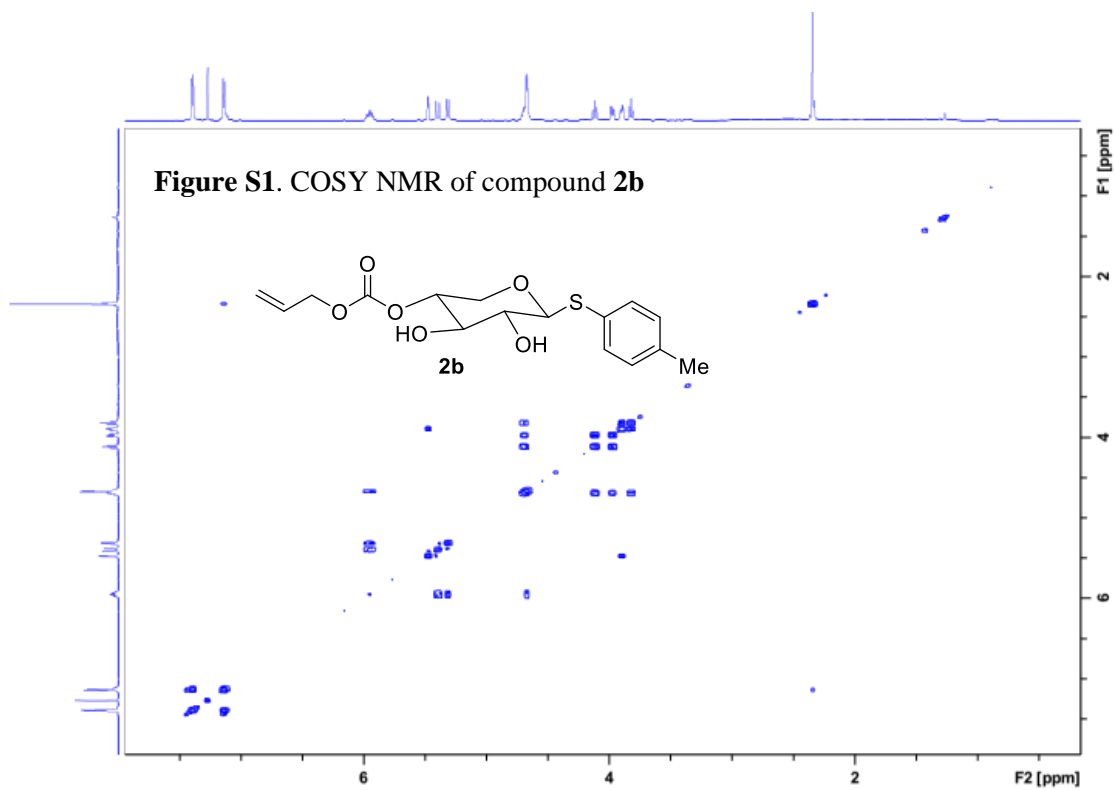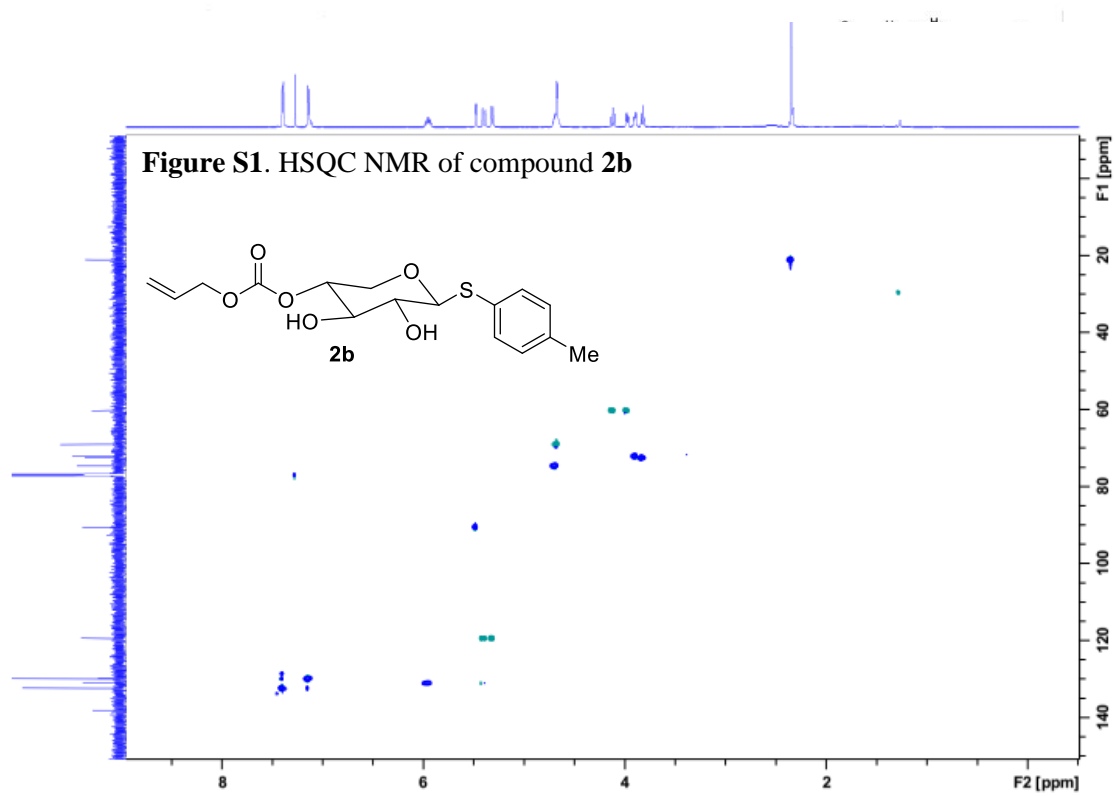

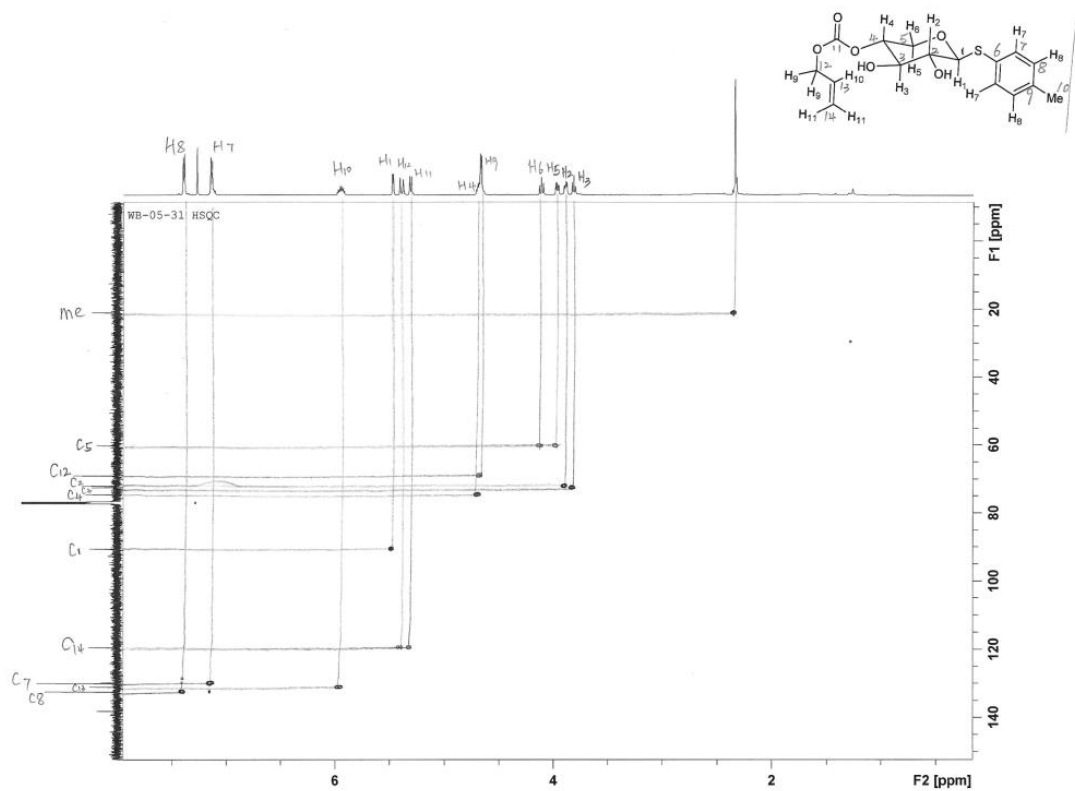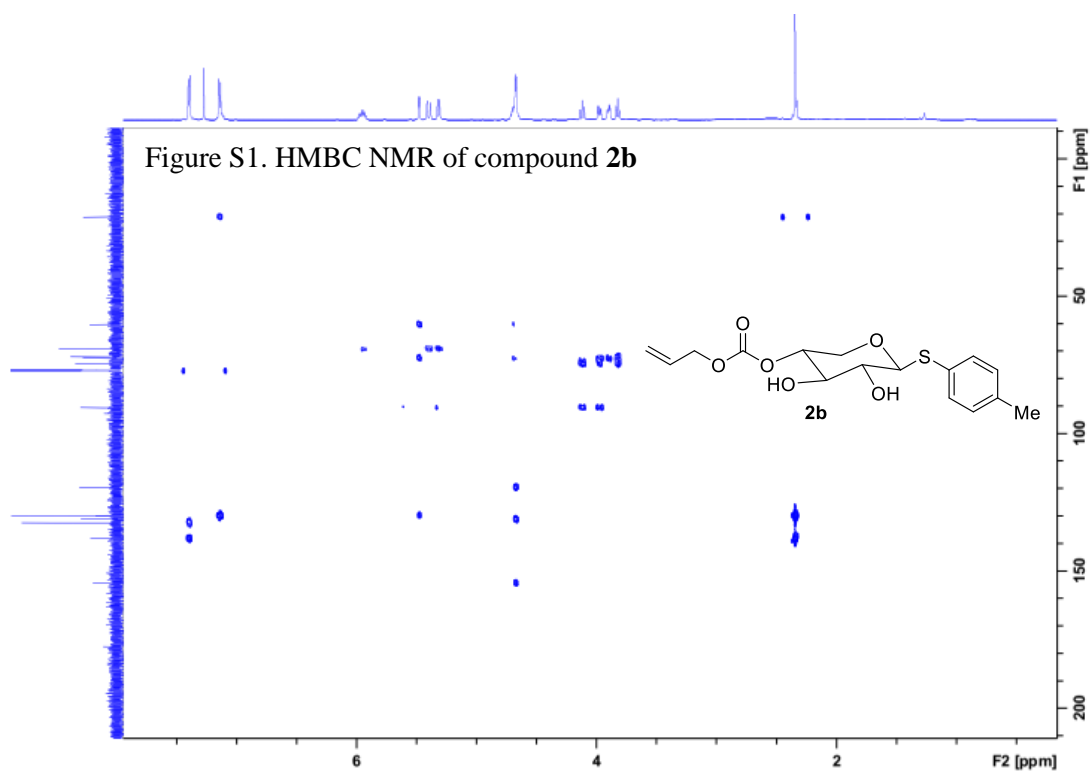



WB-04-77

7.637  
7.628  
7.130  
7.119

4.832  
4.815  
4.815  
4.807  
4.800  
4.791  
4.680  
4.660  
4.122  
4.113  
4.103  
4.094  
3.708  
3.693  
3.394  
3.379  
3.364  
3.284  
3.283  
3.283  
2.774  
2.764  
2.619  
2.609  
2.596  
2.580  
2.570  
2.560  
2.549  
2.342  
2.179

Figure S1.  $^1\text{H}$  NMR of compound **2c**

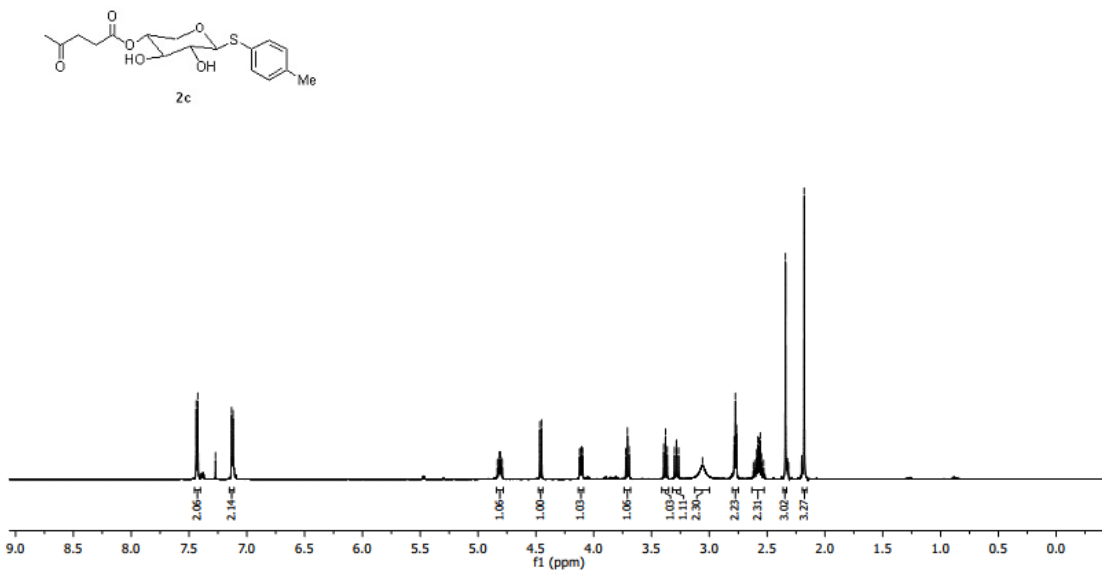

WB-04-77

207.223

172.323

138.578

133.586

129.776

127.457

88.444

77.212

76.280

76.280

75.303

71.840

71.168

66.344

38.035

29.742

27.942

21.095

Figure S1.  $^{13}\text{C}$  NMR of compound **2c**

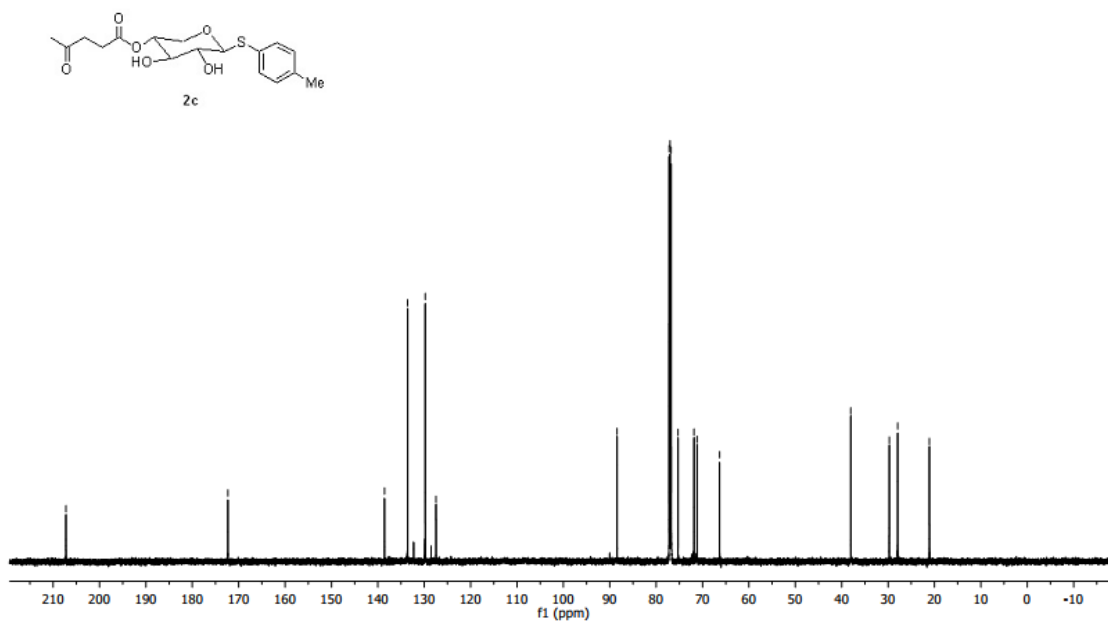

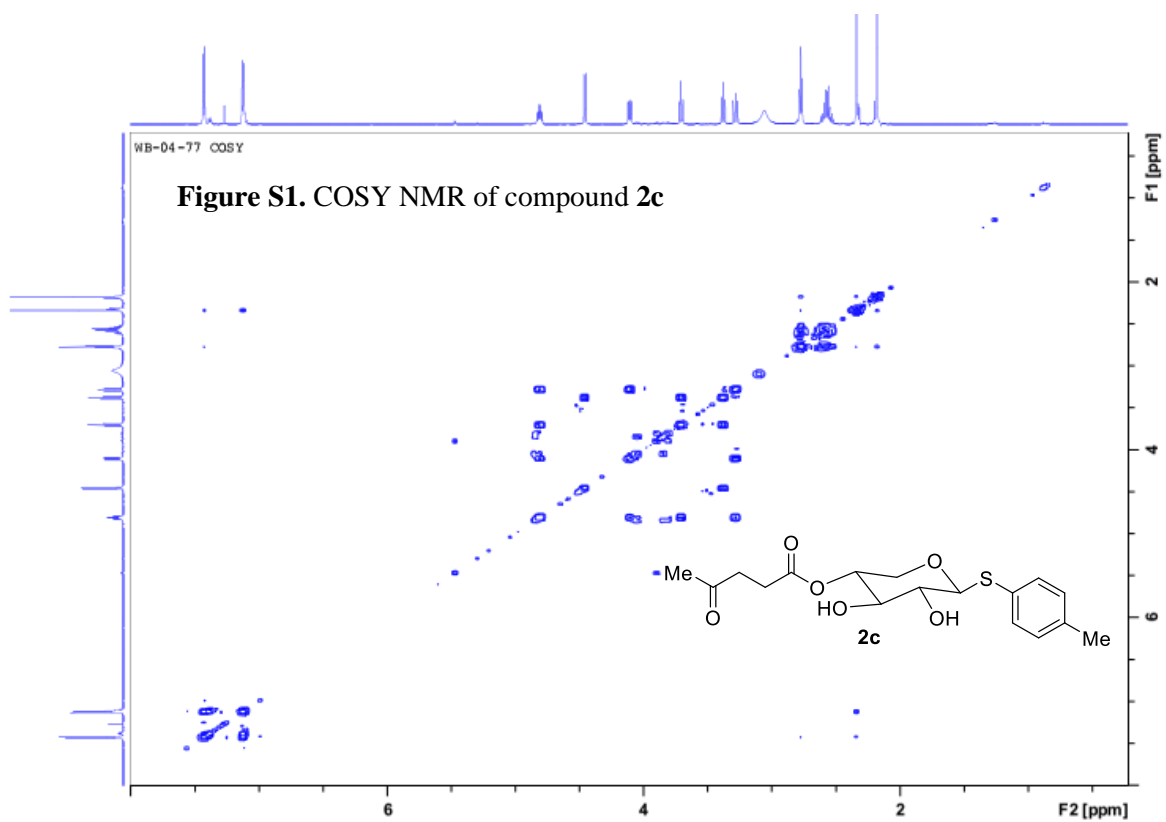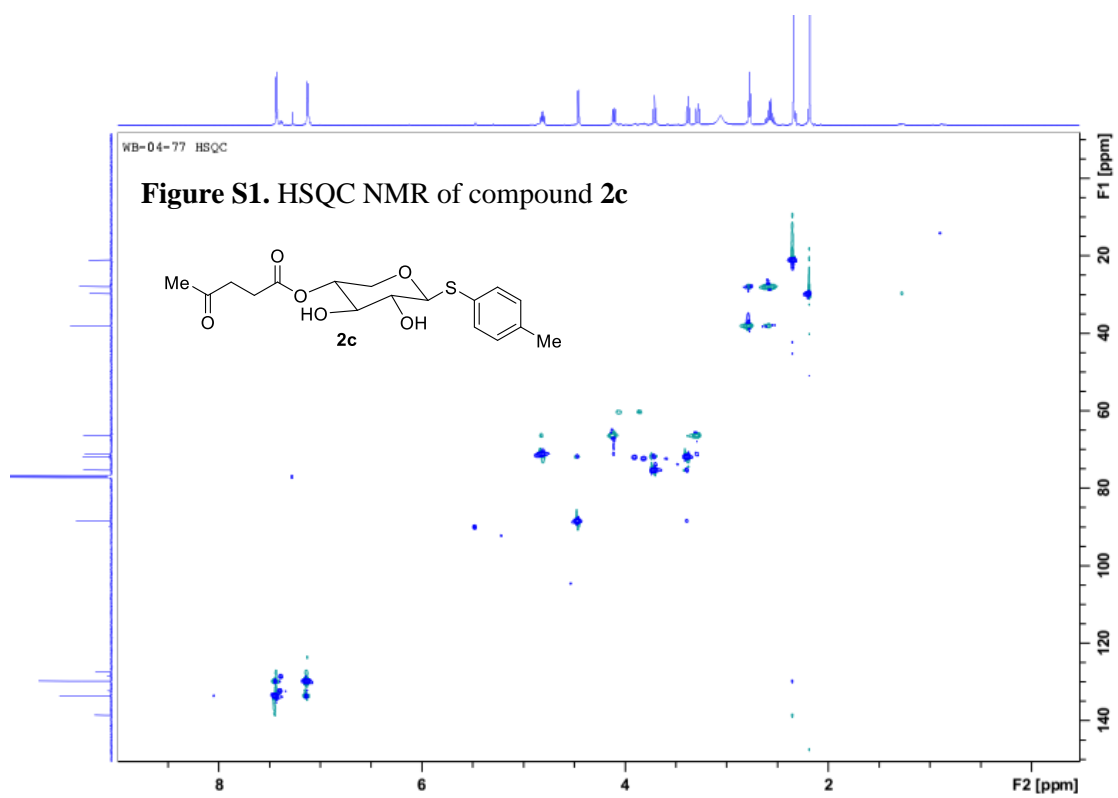

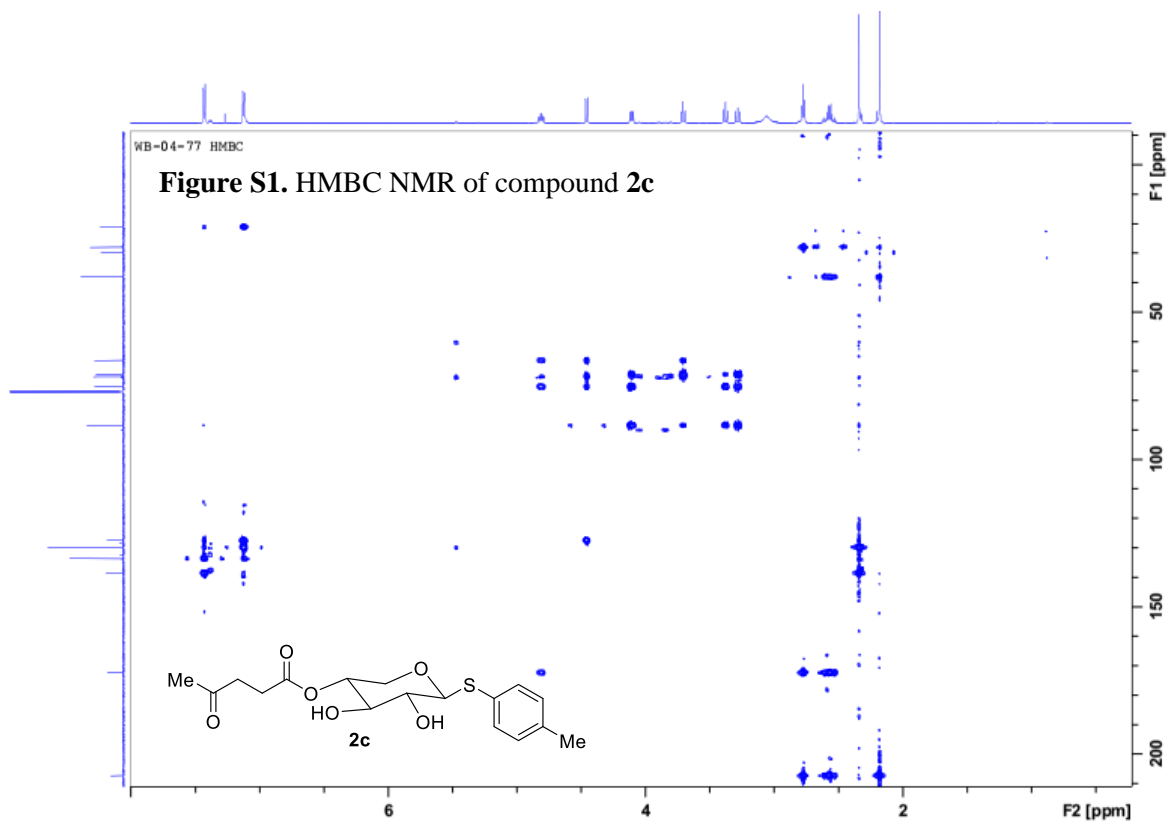

WB-04-41

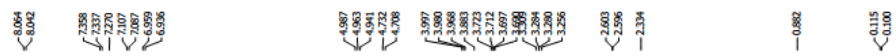

**Figure S1. <sup>1</sup>H NMR of compound 3**

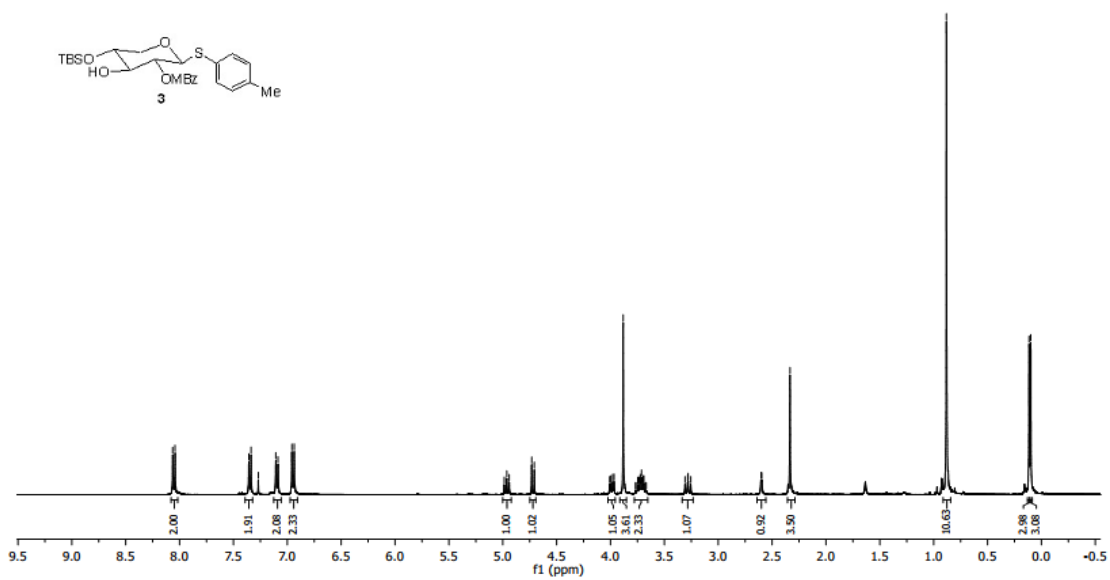

WB-04-41

165.886  
163.683  
136.243  
133.286  
132.062  
129.660  
128.608  
121.993  
113.666  
87.037  
77.511  
77.317  
77.000  
76.683  
72.678  
71.369  
70.001  
55.447  
25.665  
21.131  
18.008  
-4.651  
-4.718

Figure S1.  $^{13}\text{C}$  NMR of compound 3

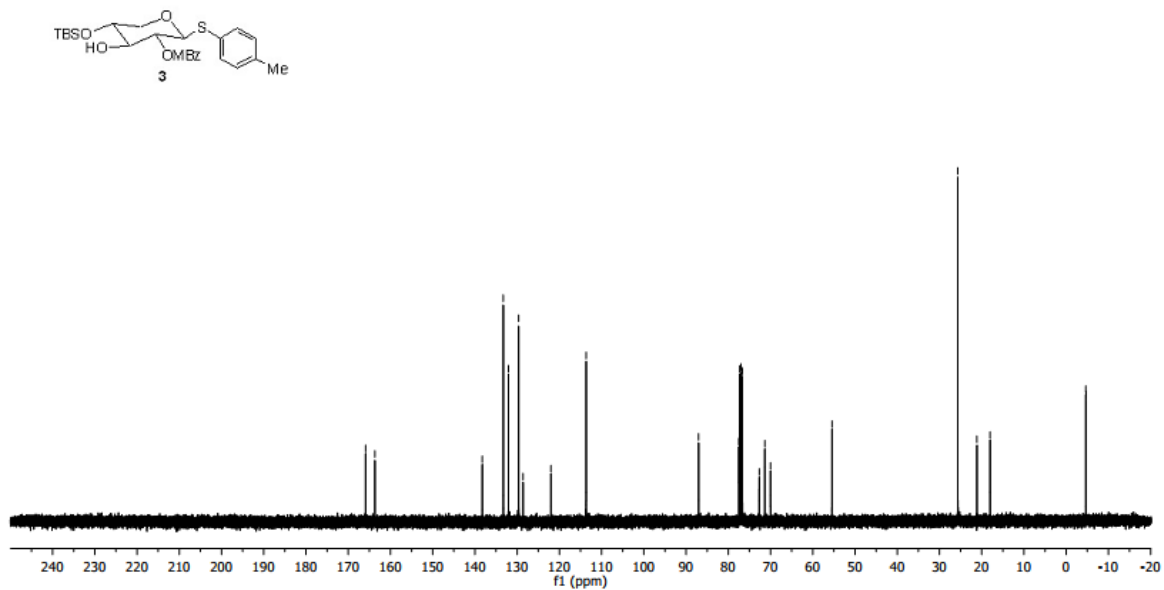

WB-04-45

8.062  
8.040  
7.272  
7.270  
7.087  
7.067  
6.921  
6.899  
5.089  
5.075  
5.064  
4.405  
4.388  
4.376  
4.368  
3.875  
3.864  
3.851  
3.667  
3.659  
3.645  
3.448  
3.435  
3.418  
3.404  
2.311  
0.972  
0.952  
0.933  
0.852  
0.835  
0.816  
0.666  
0.596  
0.092  
0.036

Figure S1.  $^1\text{H}$  NMR of compound 4

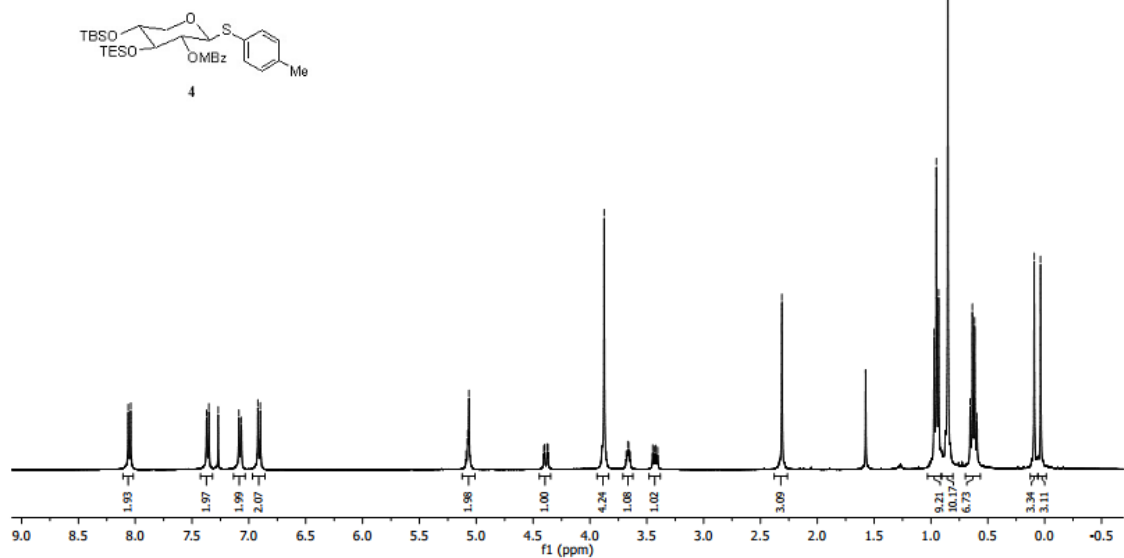

WB-04-45

165.309  
163.467

137.211  
132.031  
131.993  
128.665  
128.562  
122.591  
113.477

87.371  
77.317  
77.000  
77.000  
76.682  
72.806  
72.398  
67.676  
62.605  
55.406

25.869  
21.061  
18.116

6.867  
4.889  
4.688

**Figure S1.**  $^{13}\text{C}$  NMR of compound **4**

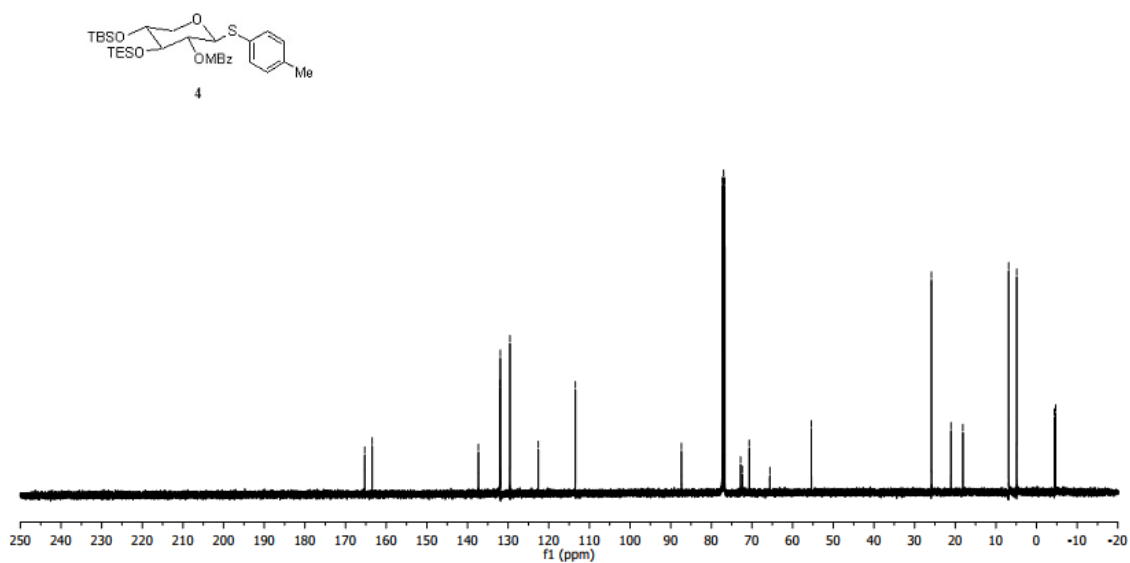

**Figure S1.** COSY NMR of compound **4**

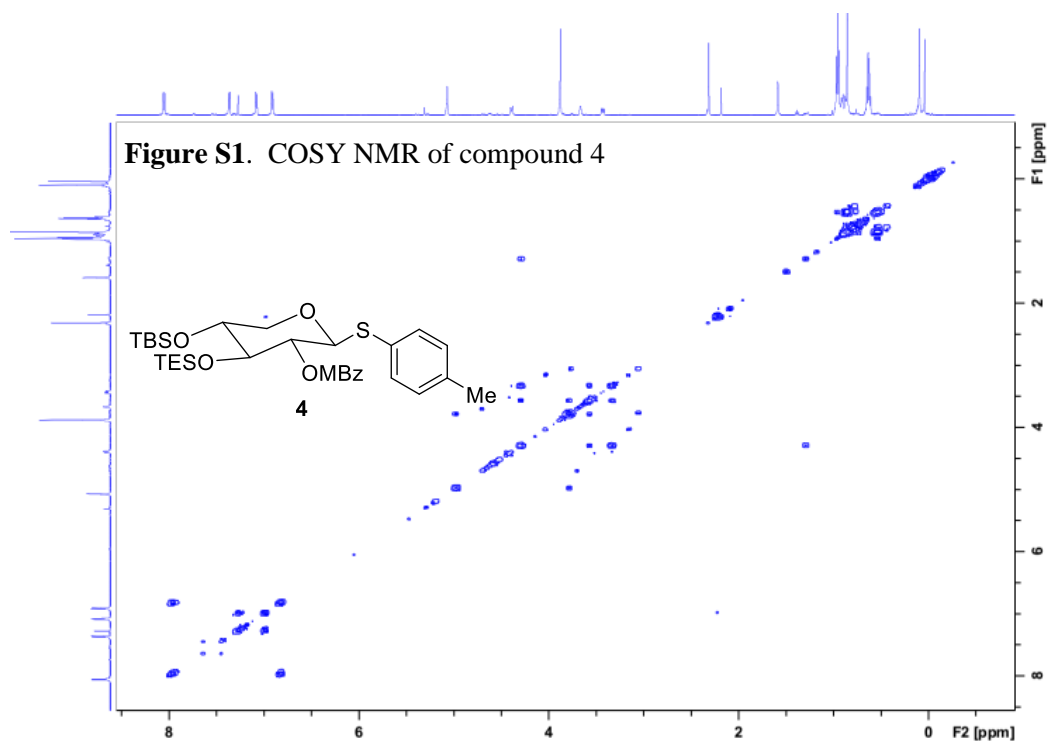

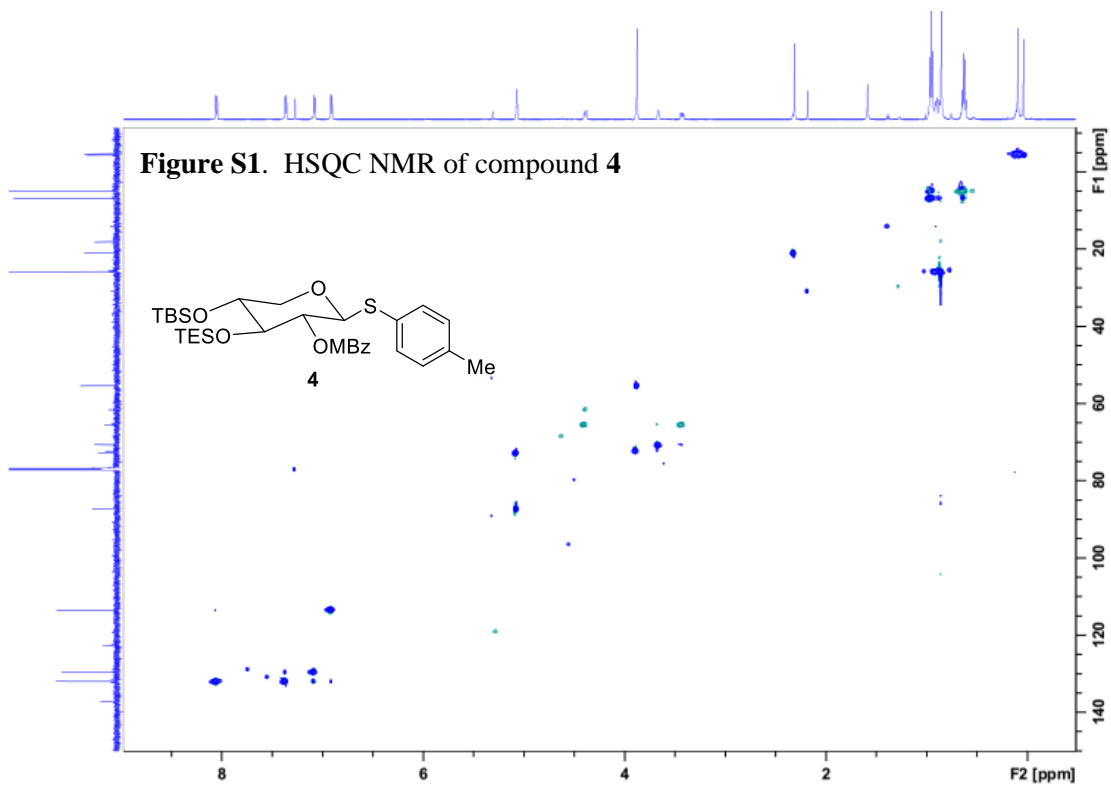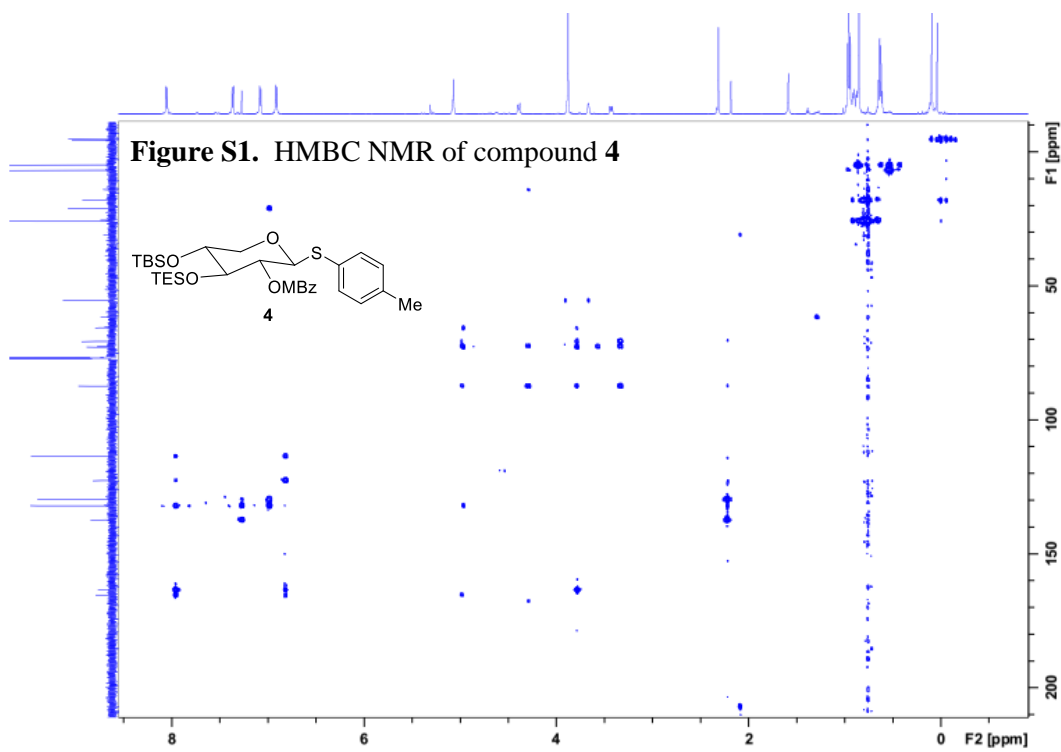

WB-04-49

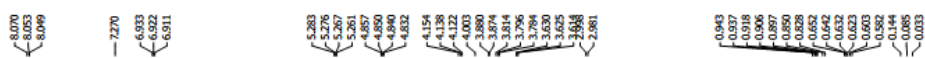Figure S1. <sup>1</sup>H NMR of compound 5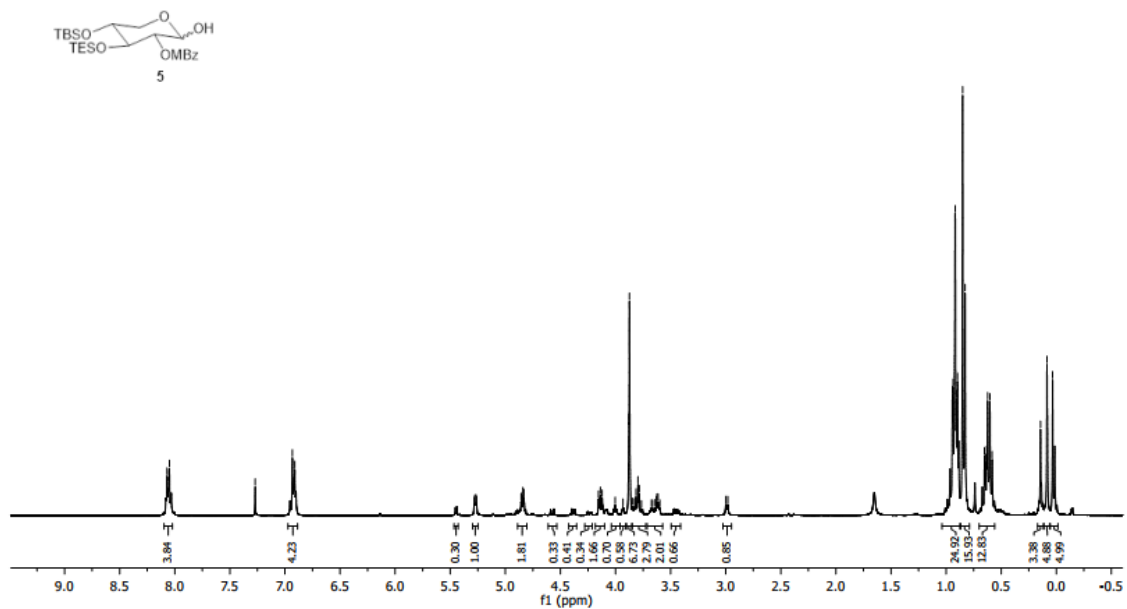

WB-05-32

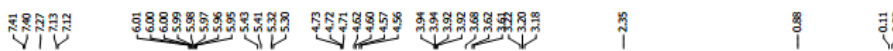Figure S1. <sup>1</sup>H NMR of compound 3a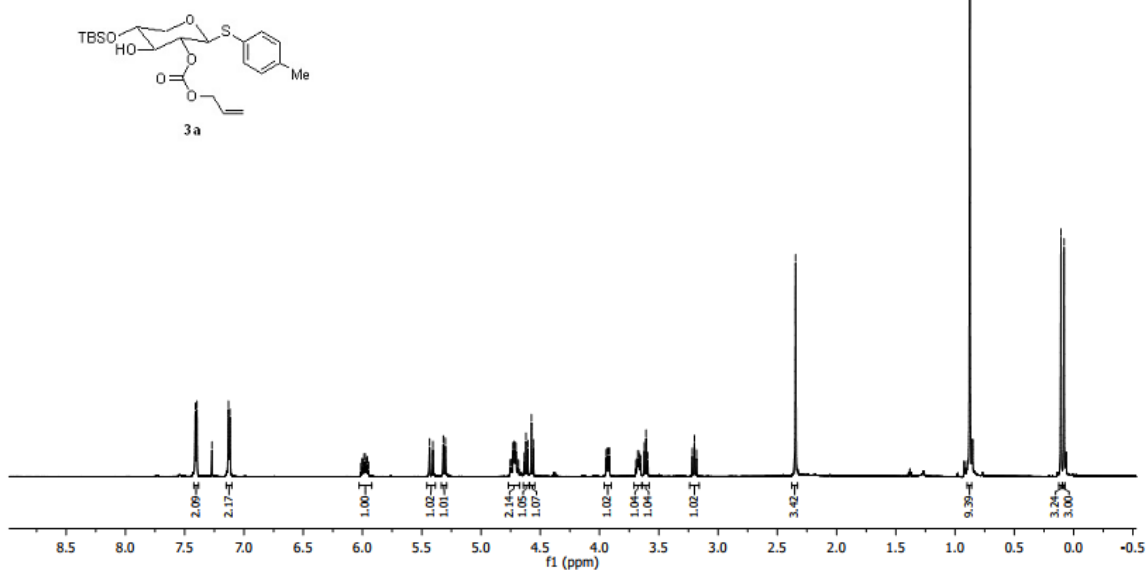

WB-05-32

Figure S1.  $^{13}\text{C}$  NMR of compound **3a**

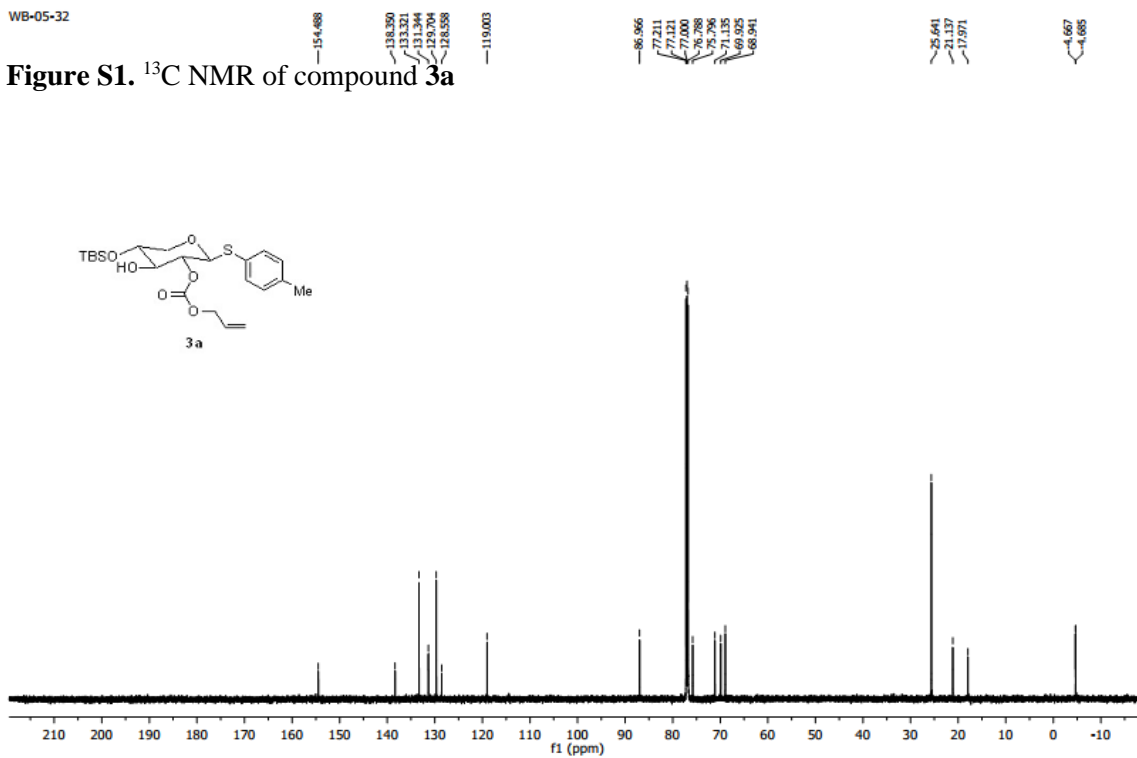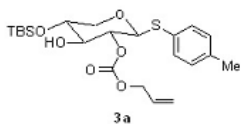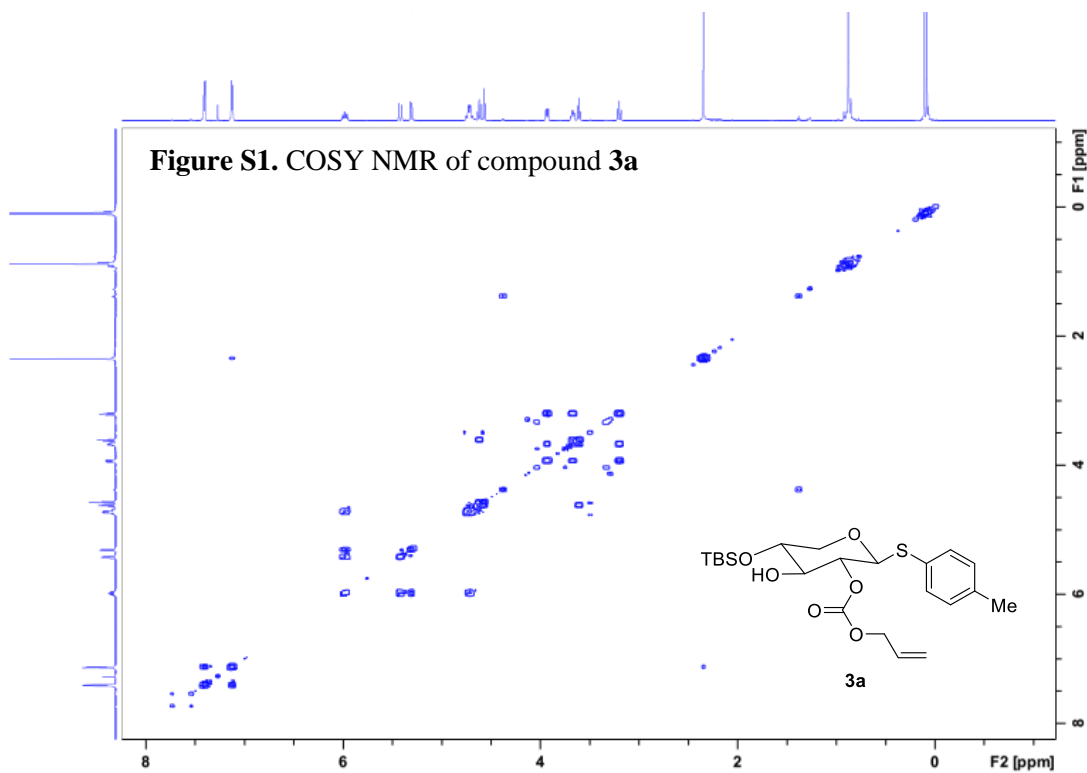

Figure S1. COSY NMR of compound **3a**

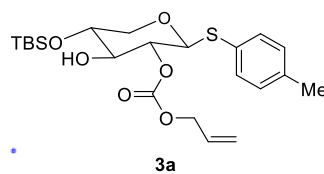



WB-05-36

7.294  
7.273  
7.270  
7.110  
7.077

6.002  
5.992  
5.984  
5.984  
5.984  
5.955  
5.946  
5.936  
5.927  
5.910  
5.901  
5.284

4.774  
4.761  
4.750  
4.678  
4.631  
4.619

4.139  
4.119  
4.110  
3.711  
3.699  
3.687  
3.567  
3.567  
3.247  
3.241  
3.228

2.330

0.983  
0.969  
0.956  
0.890  
0.872  
0.659  
0.635  
0.635

0.090

**B**  $^1\text{H}$  NMR of compound **4a**

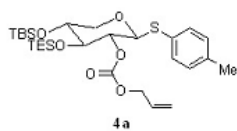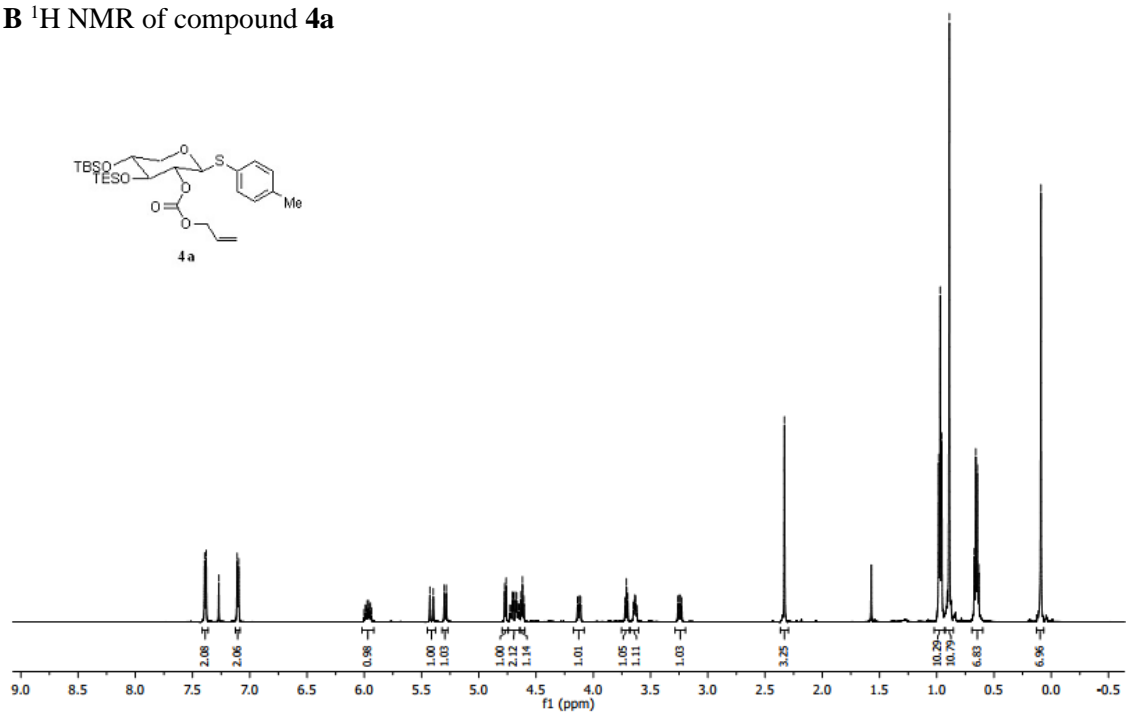

WB-05-36

154.341

137.685  
137.672  
131.457  
130.678  
129.633

118.882

87.635

77.211  
77.000  
76.808  
76.600  
74.744  
70.574  
69.692  
67.500

25.860  
21.092  
18.027

6.873  
4.918

4.254  
-1.667

**Figure S1.**  $^{13}\text{C}$  NMR of compound **4a**

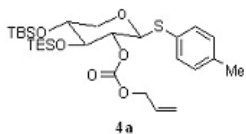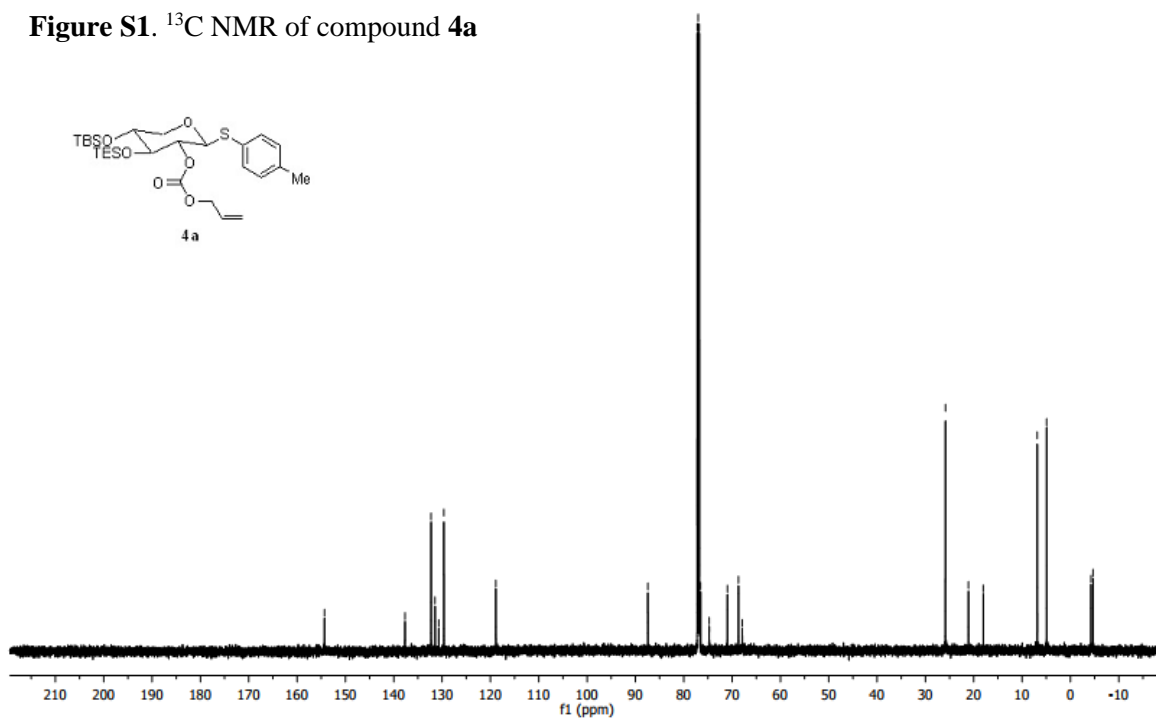

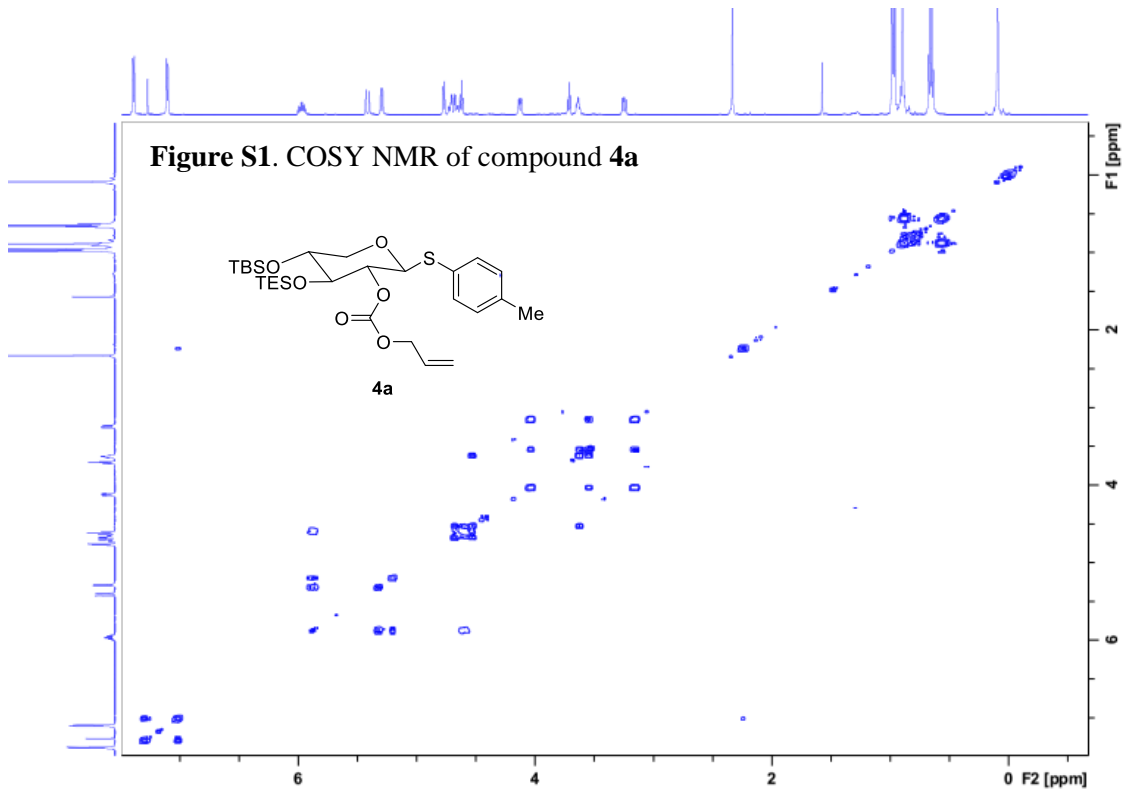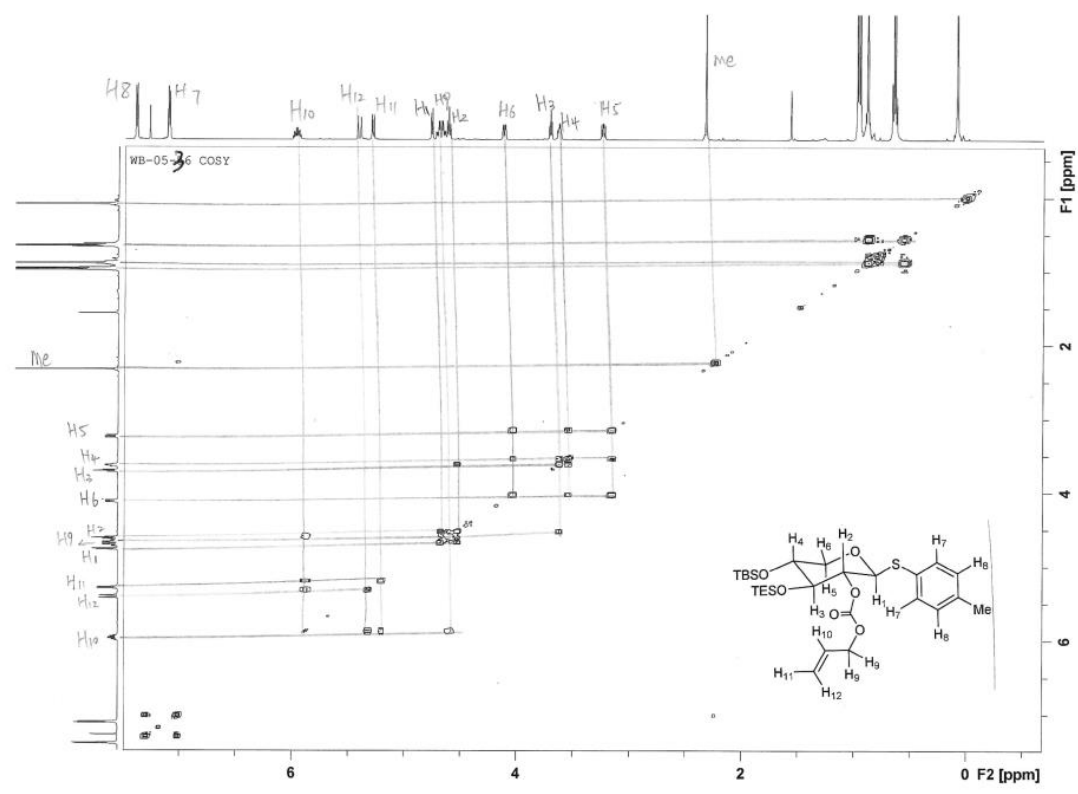

Figure S1. HSQC NMR of compound 4a

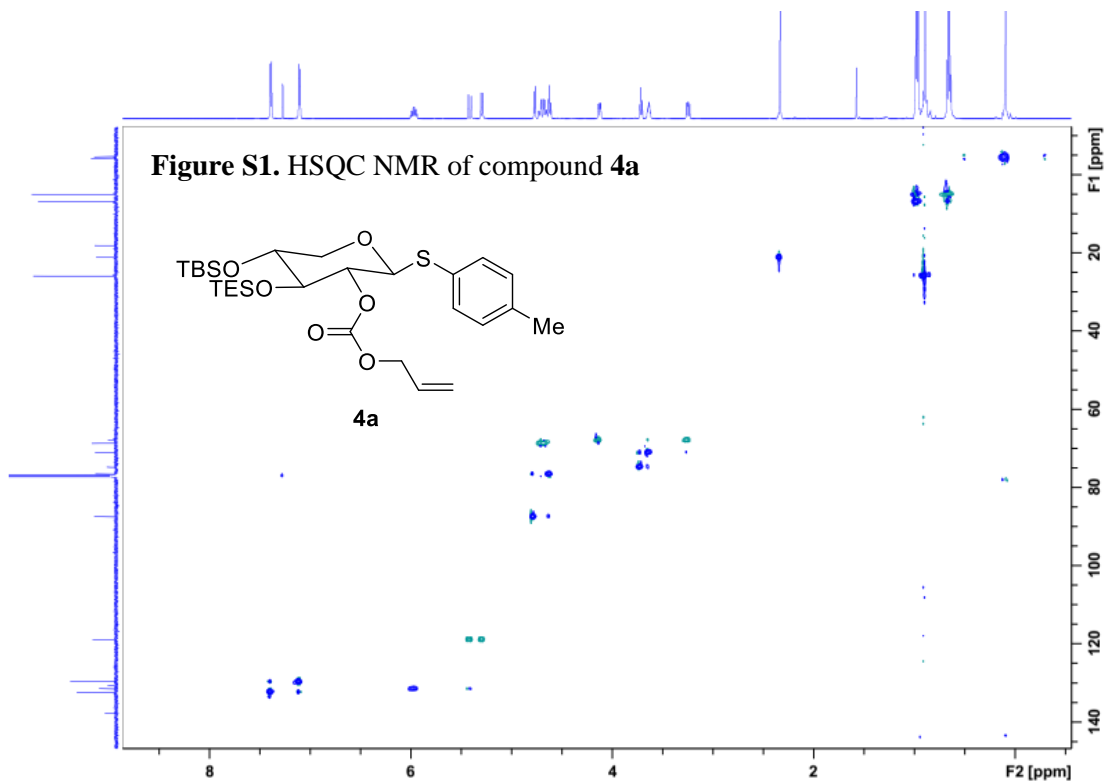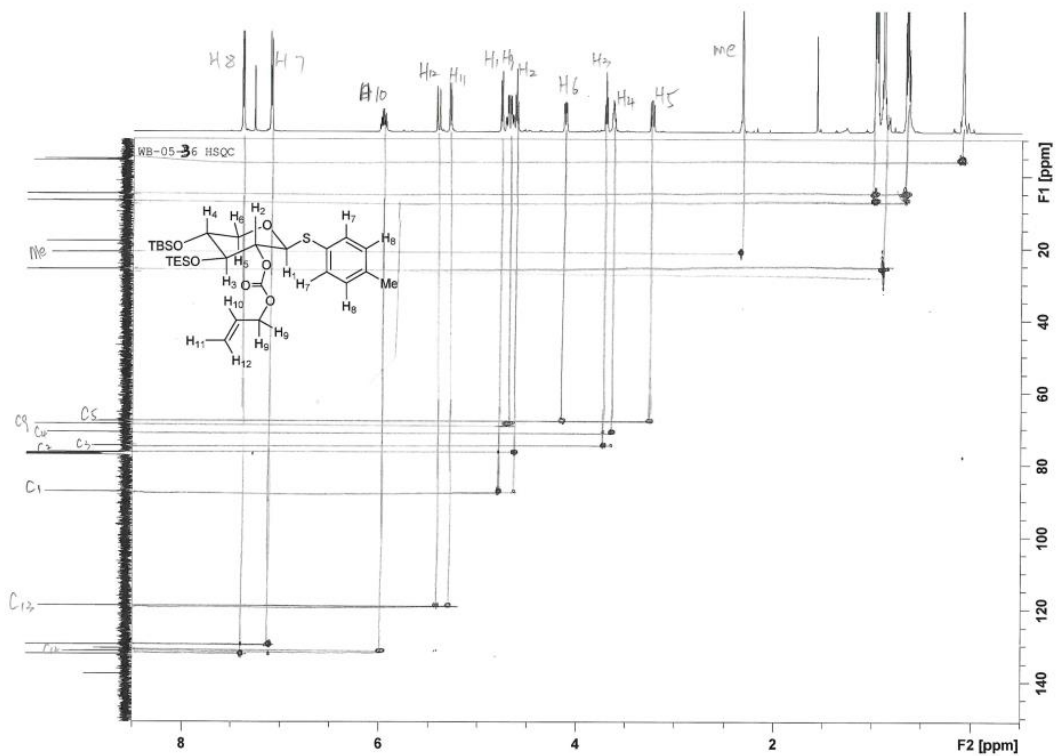

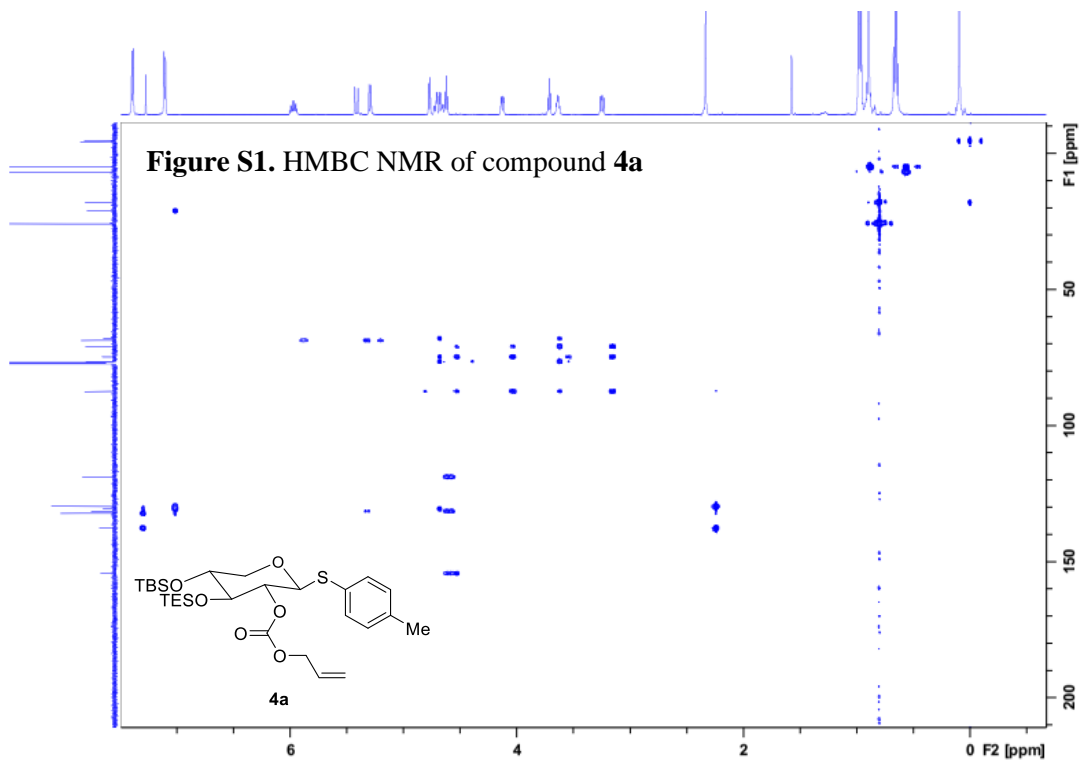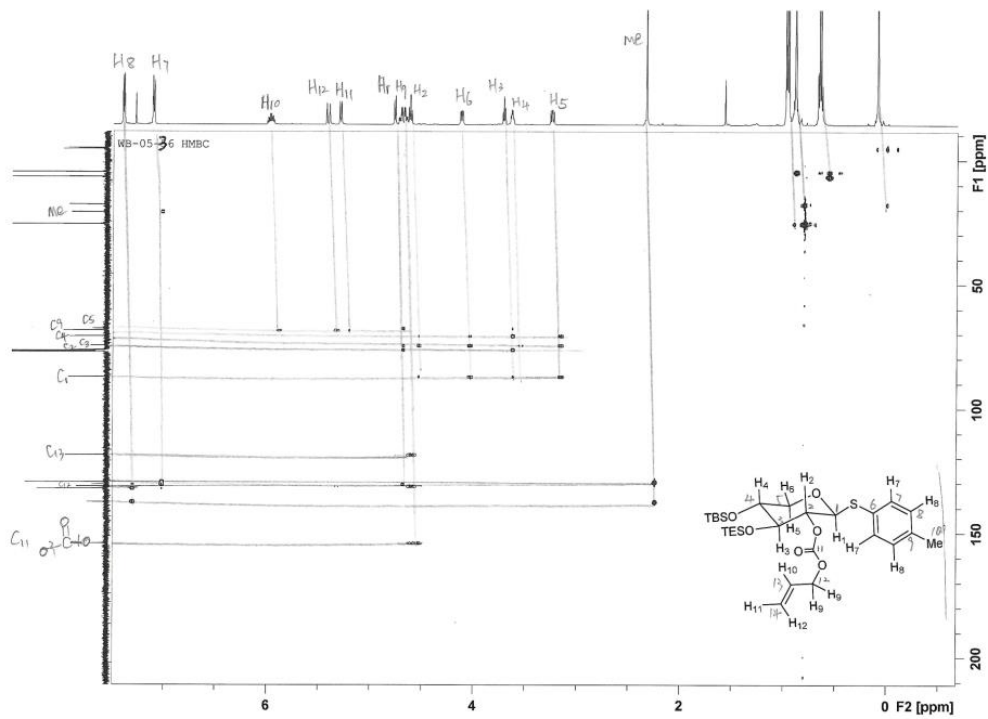

WB-04-56

7.270  
6.996  
6.973  
6.947  
6.824  
5.668  
5.588  
5.580  
5.571  
5.553  
5.422  
5.418  
5.414  
5.330  
5.321  
5.295  
5.294  
4.118  
4.086  
3.776  
3.767  
3.738  
3.733  
2.172  
2.085  
2.051

Figure S1. <sup>1</sup>H NMR of compound 8

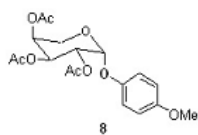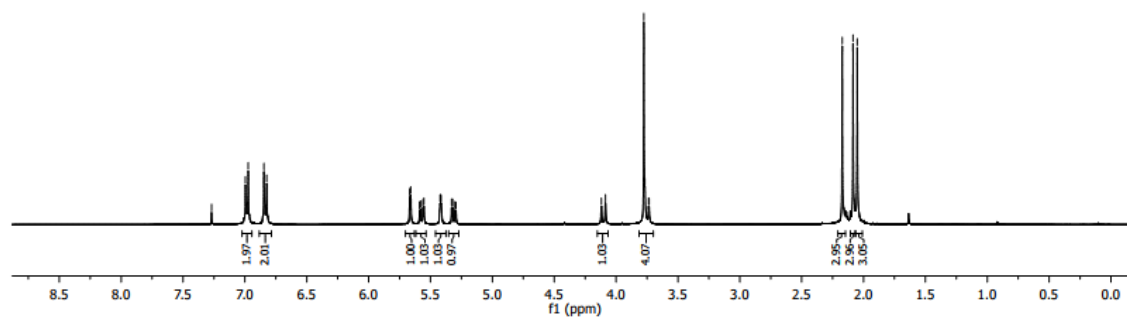

WB-04-56

170.368  
170.282  
170.039  
155.277  
150.408  
117.756  
114.676  
95.877  
77.318  
77.000  
76.683  
68.363  
68.110  
61.056  
55.642  
20.911  
20.741  
20.715

Figure S1. <sup>13</sup>C NMR of compound 8

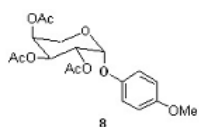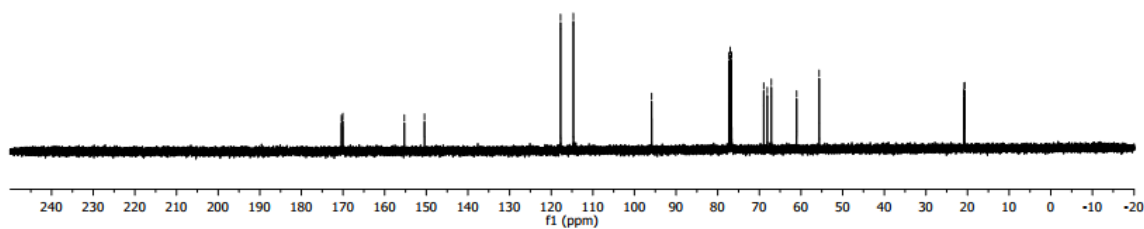

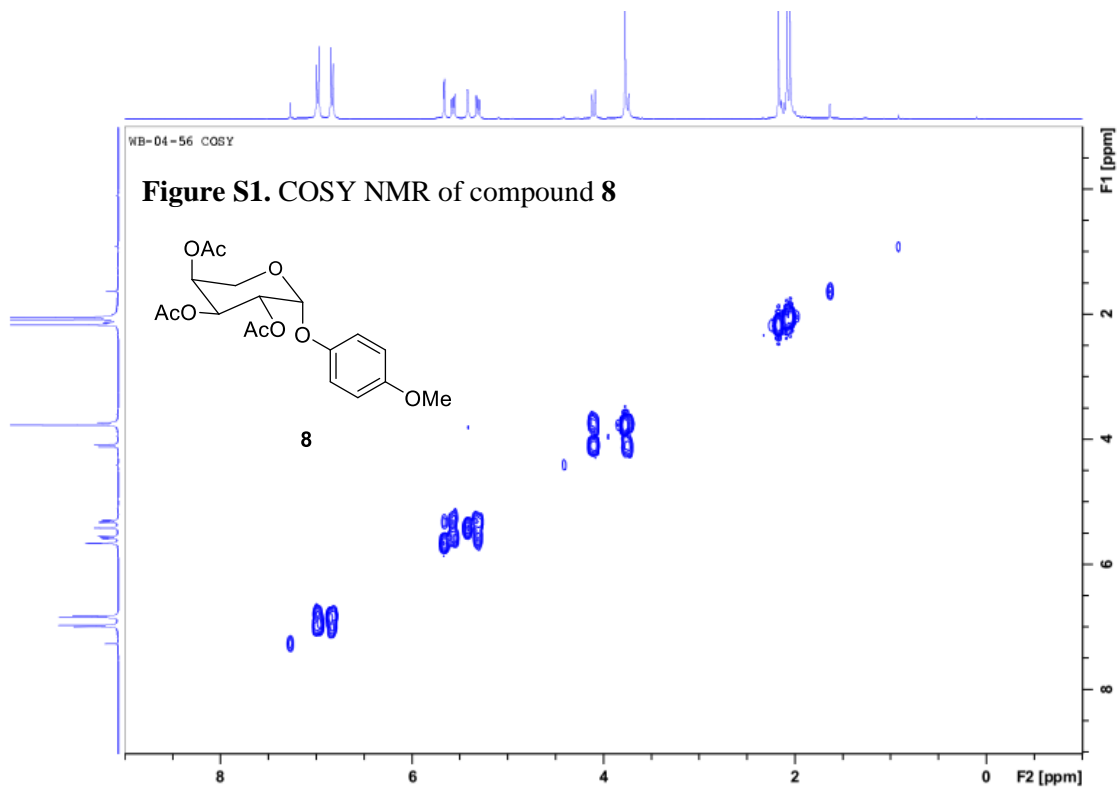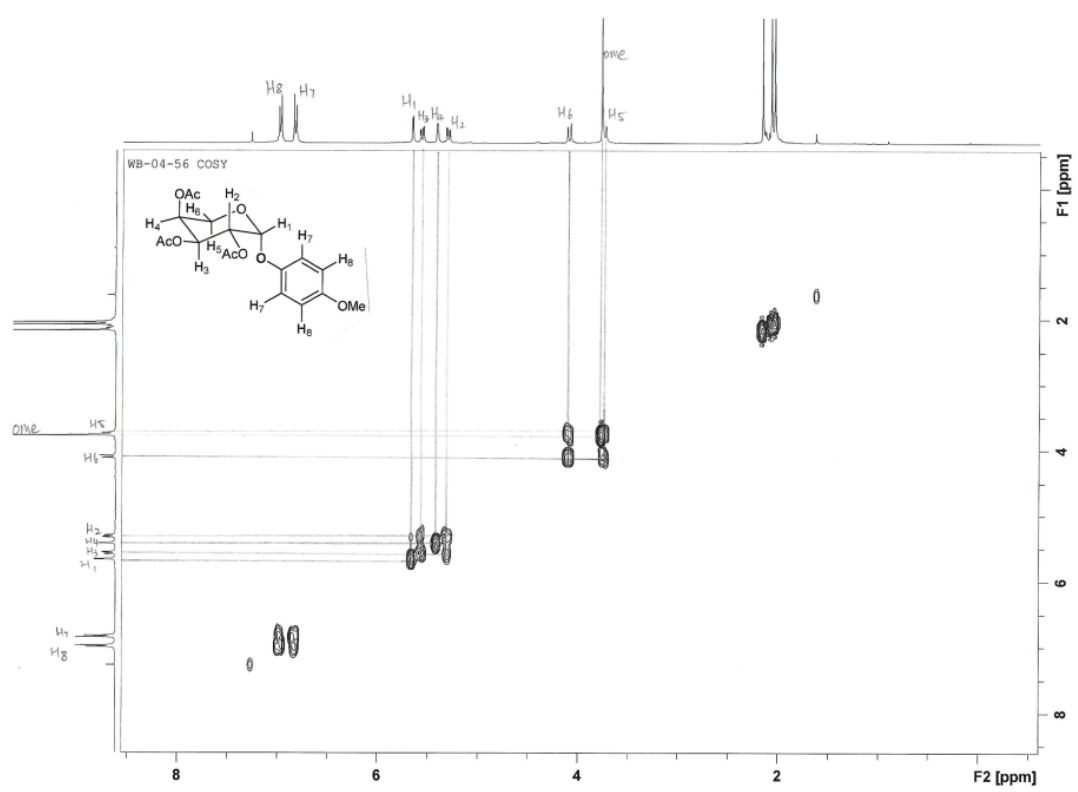

WB-04-14

7.270  
7.037  
7.022  
6.890  
6.835

5.416  
5.411

4.368  
4.357  
4.346  
4.311  
4.302  
4.286  
4.096  
4.005  
3.982  
3.944  
3.939  
3.922  
3.920  
3.781

1.570  
1.401

Figure S1.  $^1\text{H}$  NMR of compound 10

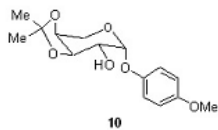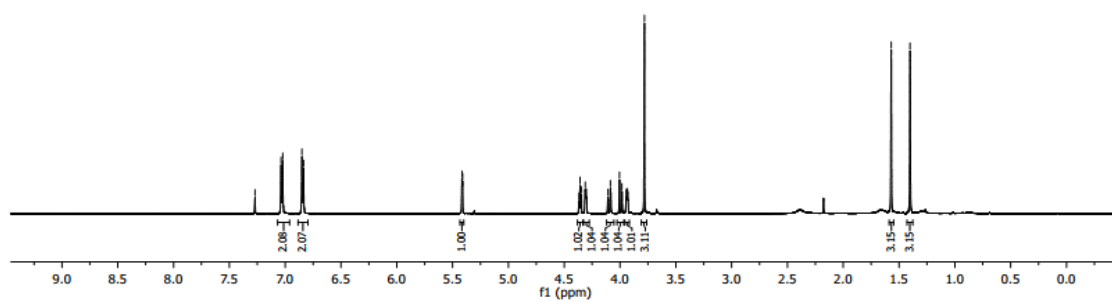

WB-04-14

155.263  
150.434

117.848  
114.678  
109.405

97.355

77.212  
77.000  
76.788  
76.576  
72.808  
70.151

60.154  
55.647

27.923  
25.932

Figure S1.  $^{13}\text{C}$  NMR of compound 10

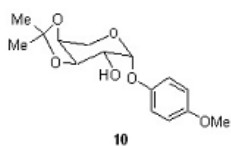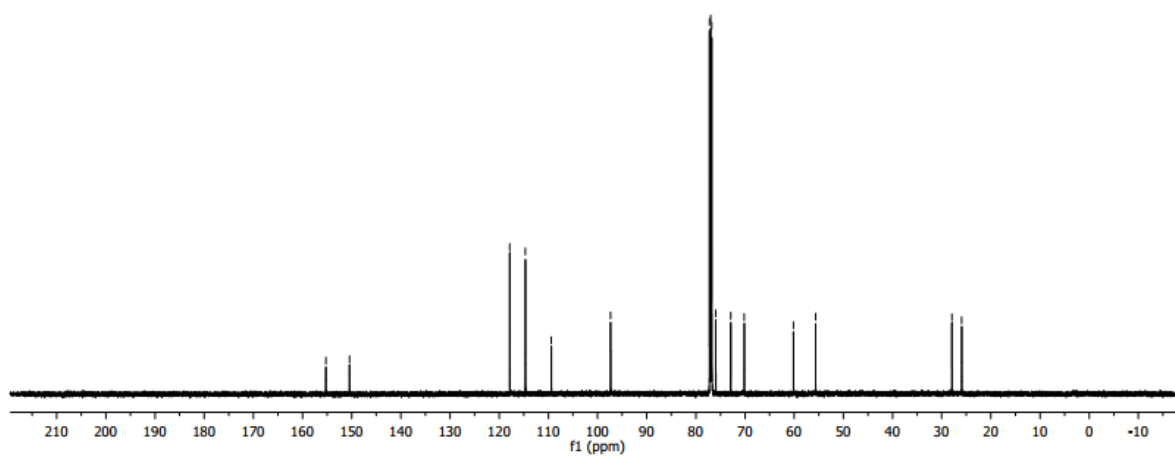

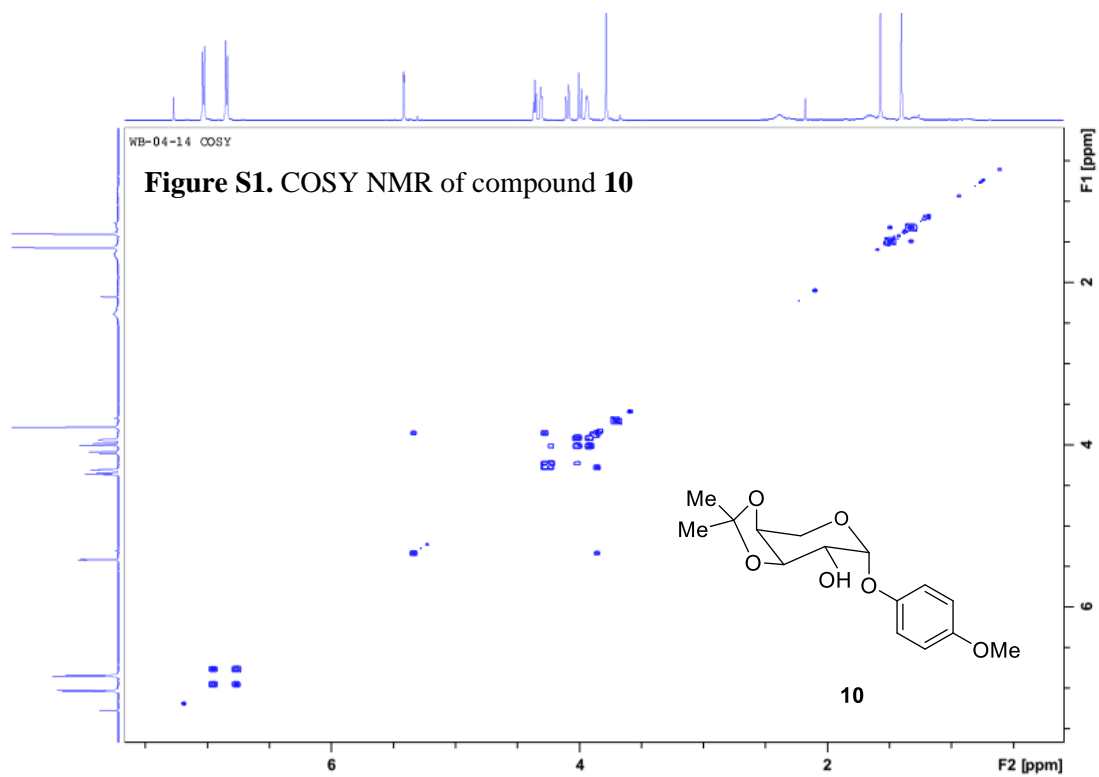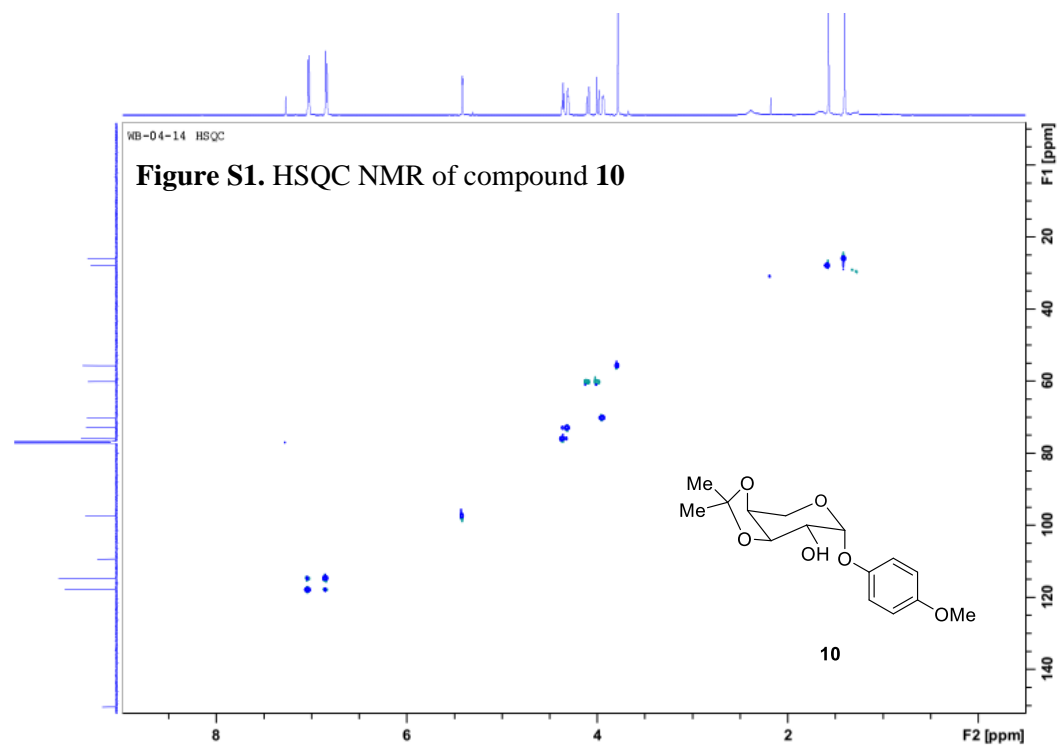



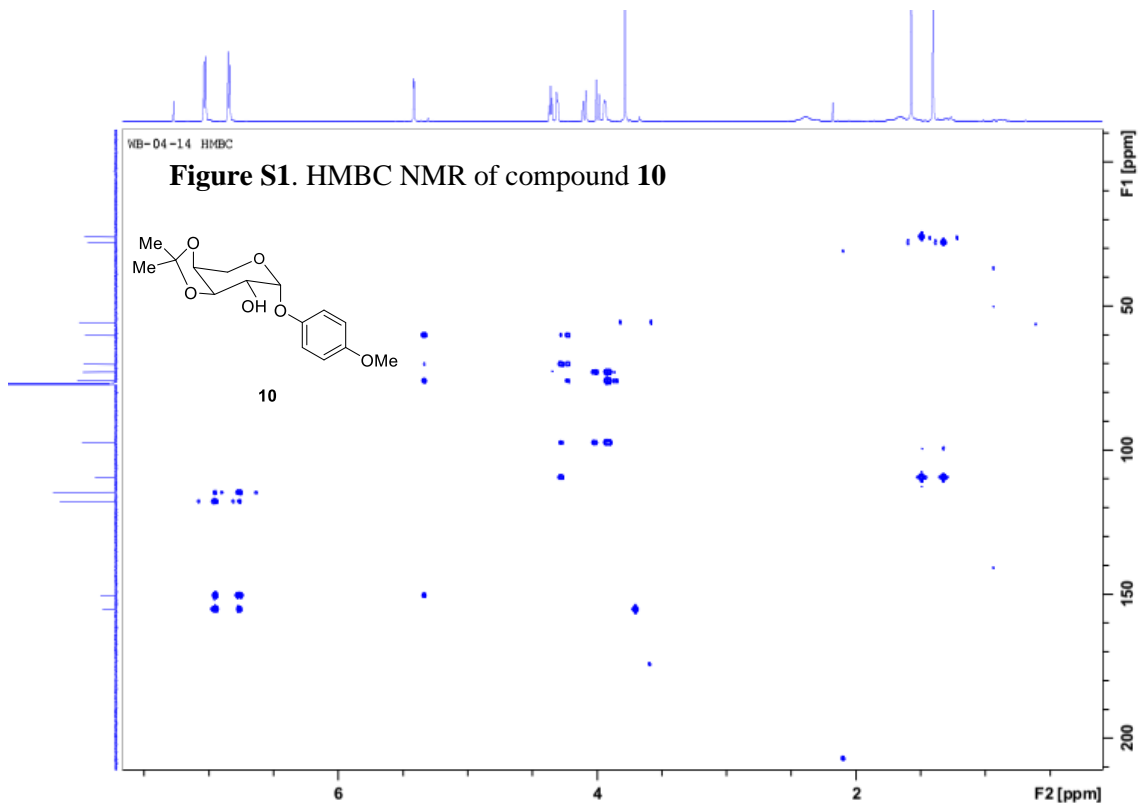

WB-04-16

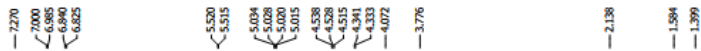

**Figure S1. <sup>1</sup>H NMR of compound 11**

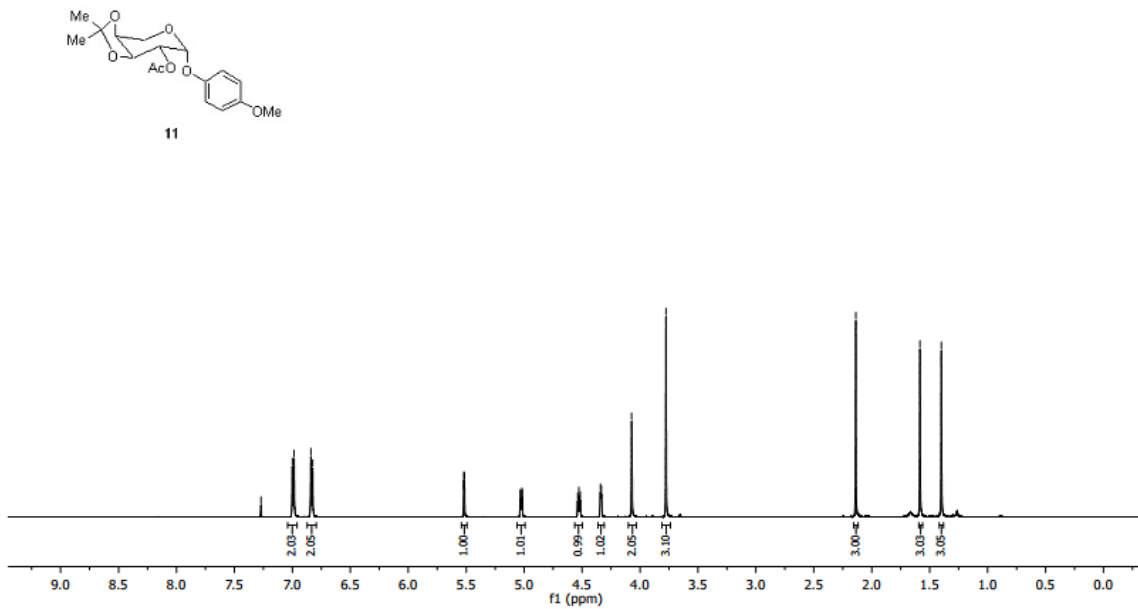

WB-04-16

170.987

155.188

150.502

117.572

114.655

109.559

95.364

77.211

77.000

76.788

73.410

72.006

72.019

59.195

55.648

27.071

26.301

20.958

**Figure S1.**  $^{13}\text{C}$  NMR of compound **11**

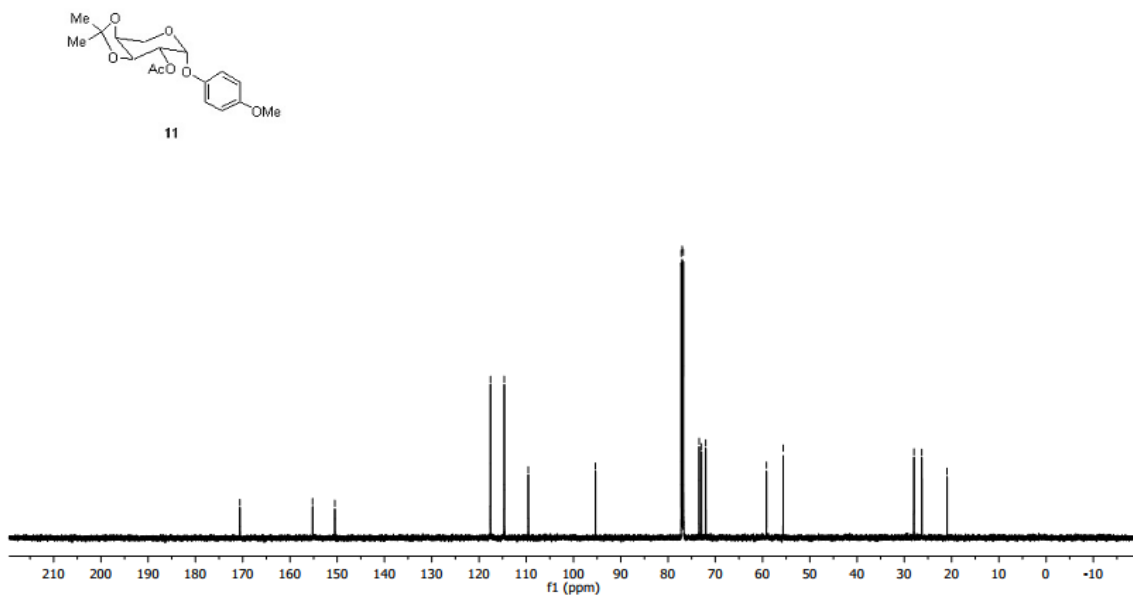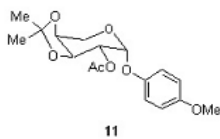

**Figure S1.** COSY NMR of compound **11**

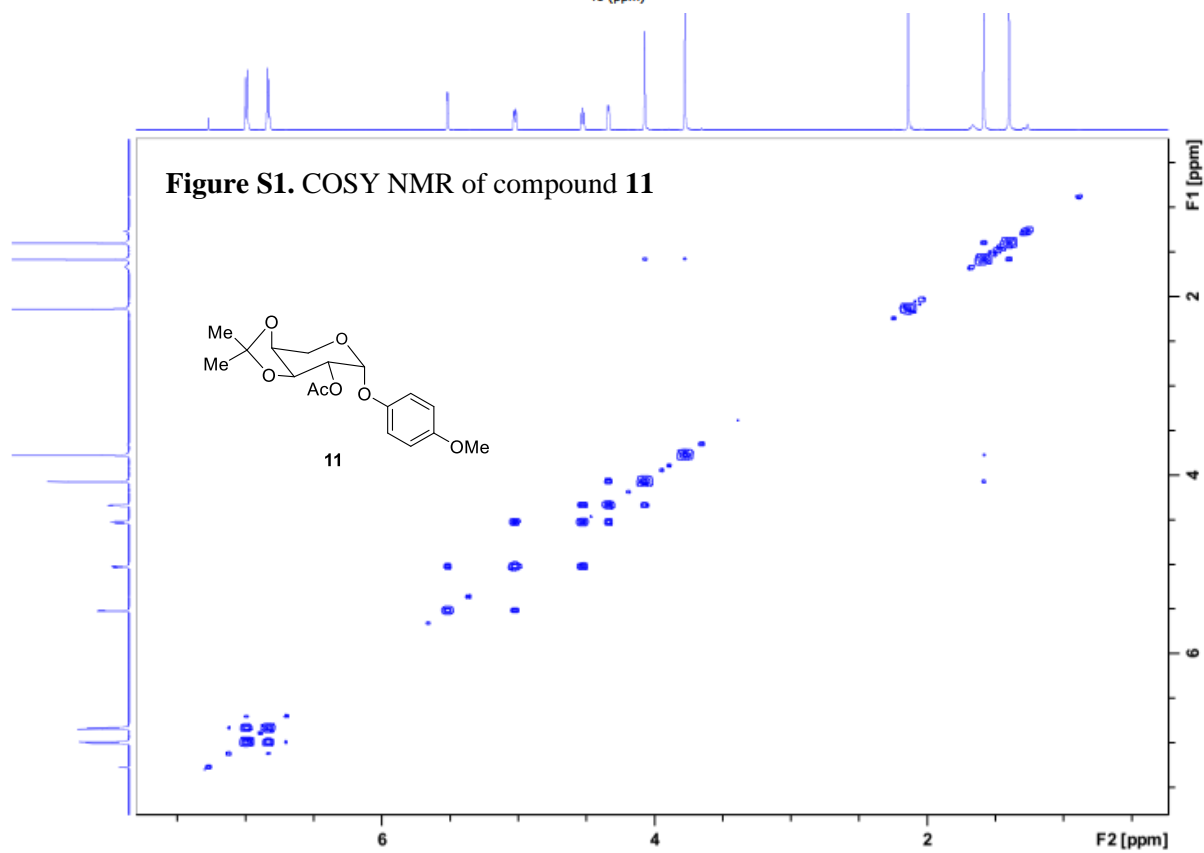

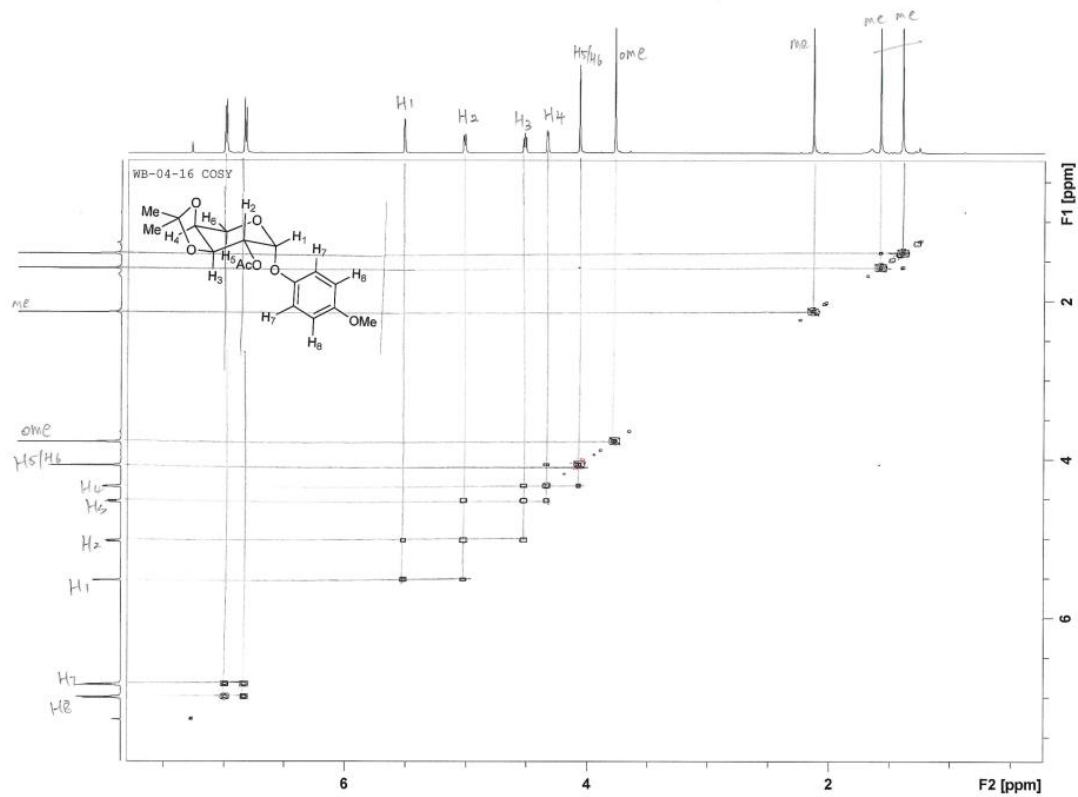

**Figure S1. HSQC NMR of compound 11**

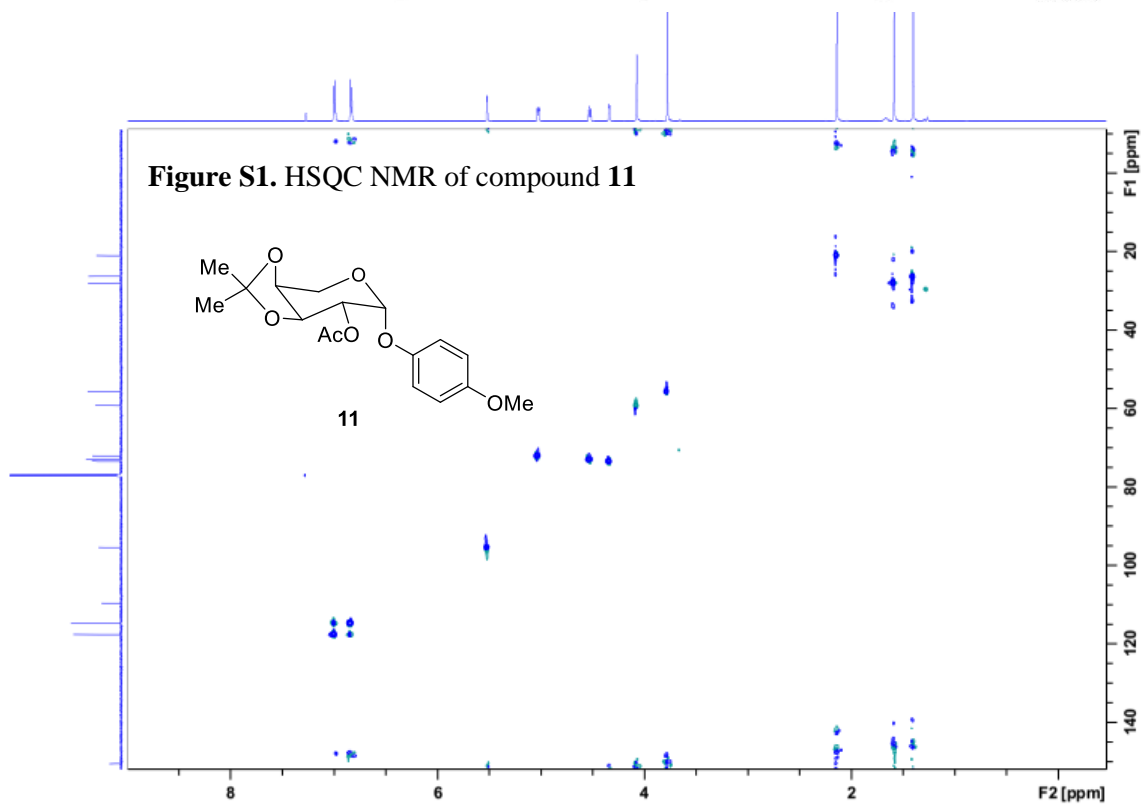

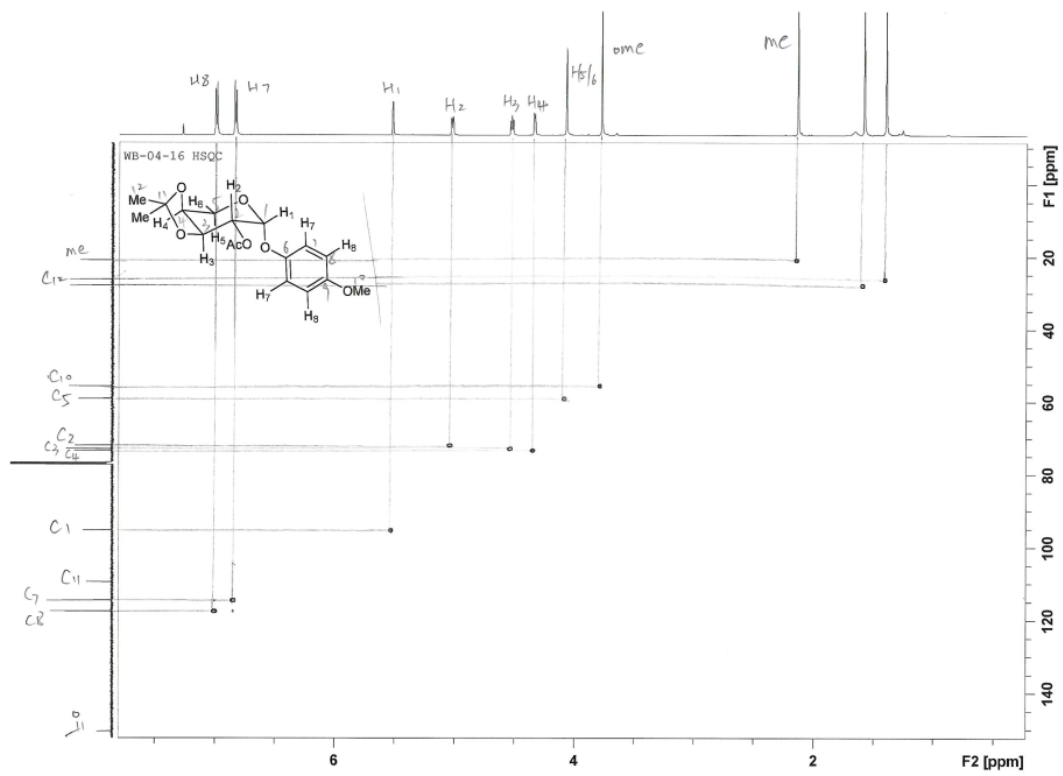

**Figure S1. HMBC NMR of compound 11**

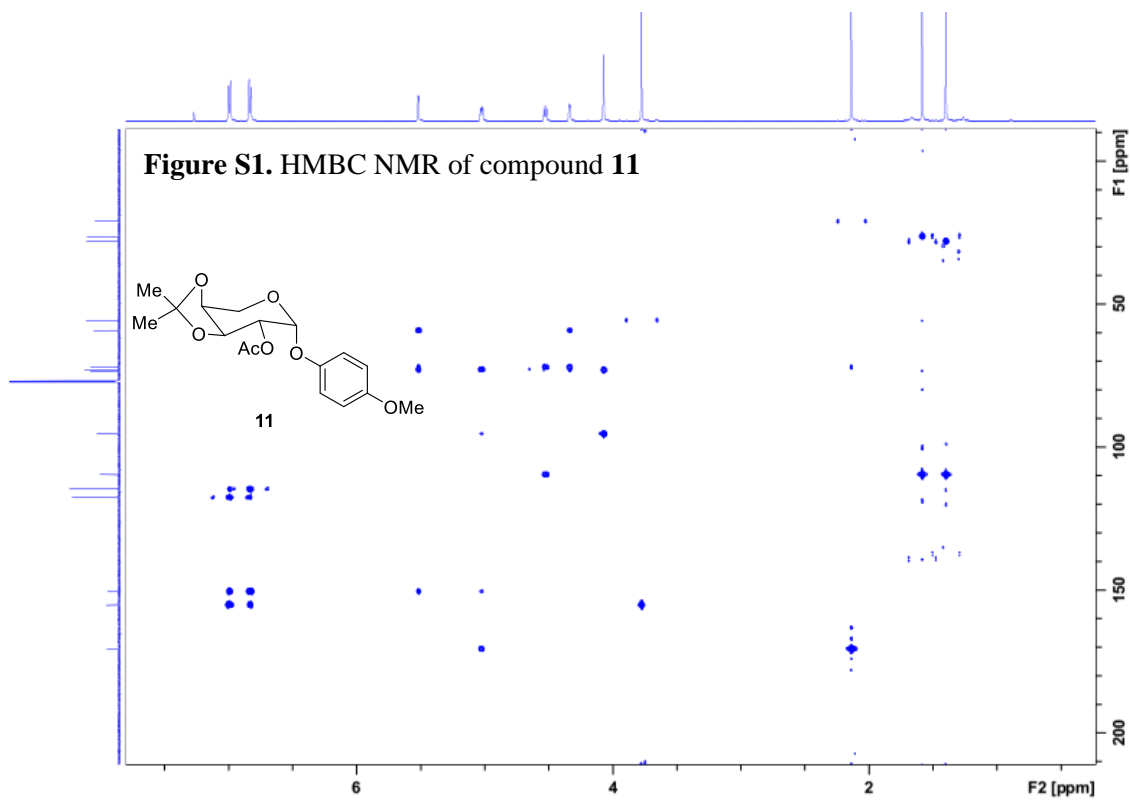

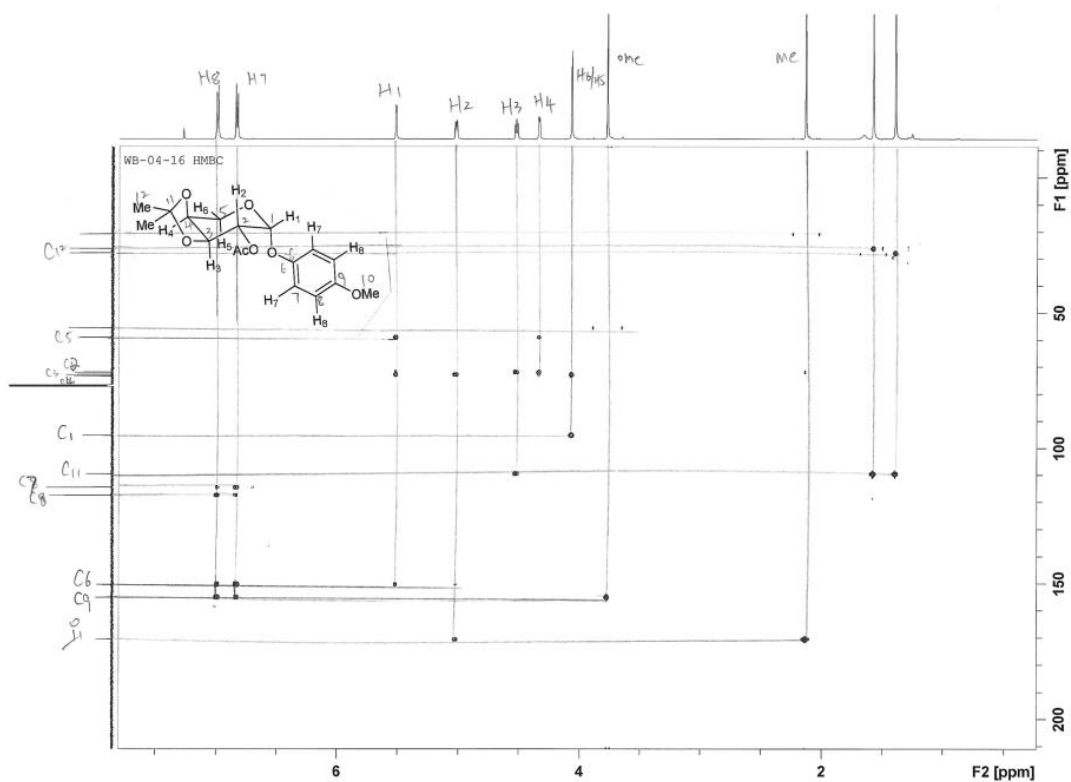

WB-04-55

7.270  
 6.999  
 6.884  
 6.838  
 6.823  
 5.580  
 5.575  
 5.171  
 5.166  
 5.154  
 5.149  
 4.380  
 4.367  
 4.102  
 4.032  
 4.011  
 3.837  
 3.822  
 3.774  
 2.971  
 2.154

Figure S1. <sup>1</sup>H NMR of compound 12

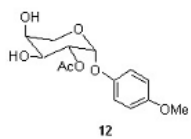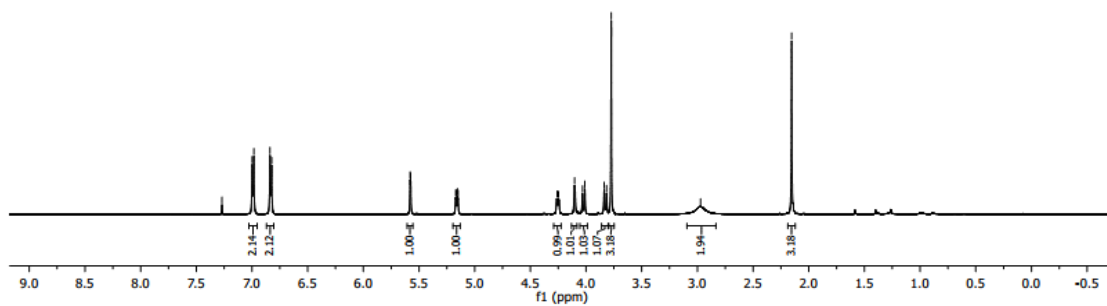

WB-04-55

171.613

155.203

150.637

117.958

114.647

96.230

77.211

77.000

76.789

71.582

69.343

67.761

62.837

55.646

20.968

**Figure S1.**  $^{13}\text{C}$  NMR of compound **12**

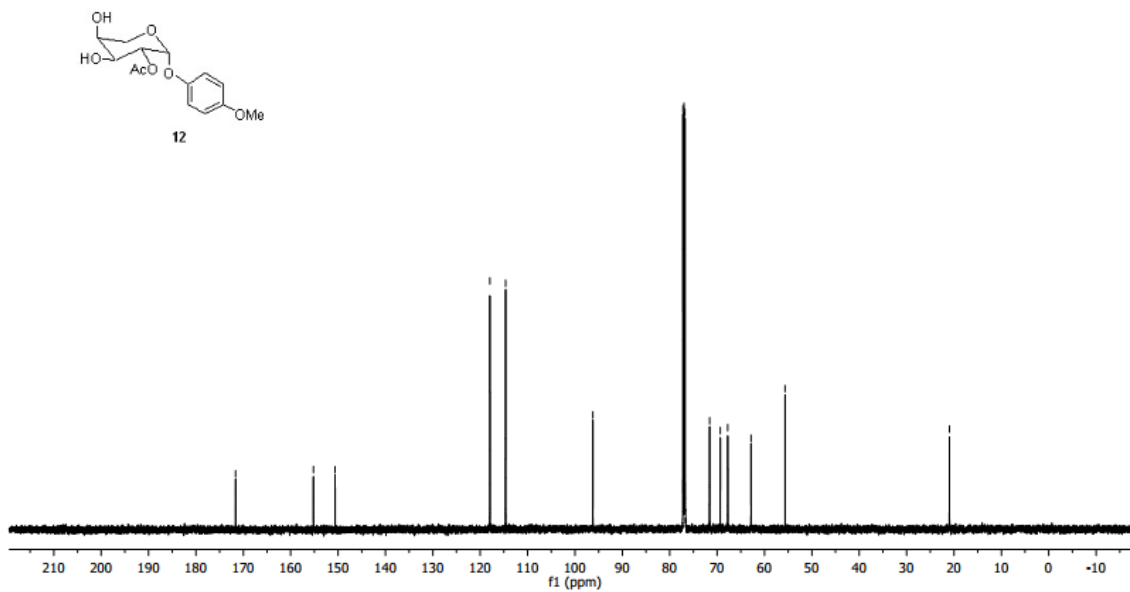

**Figure S1.** COSY NMR of compound **12**

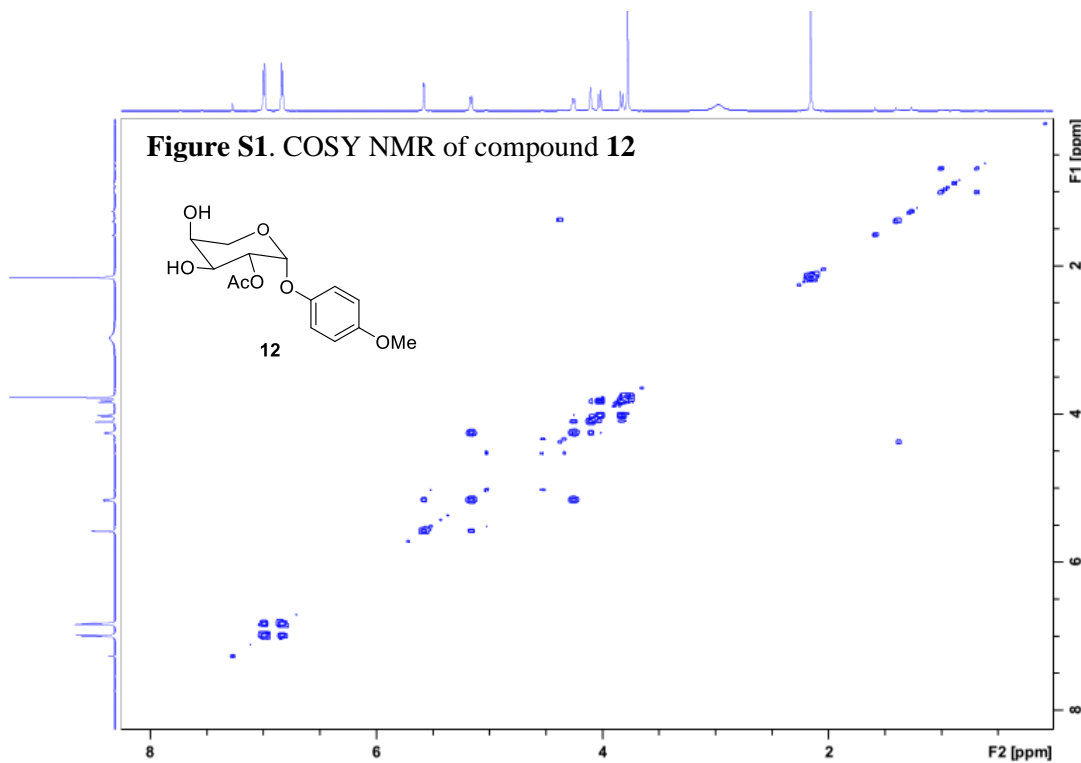

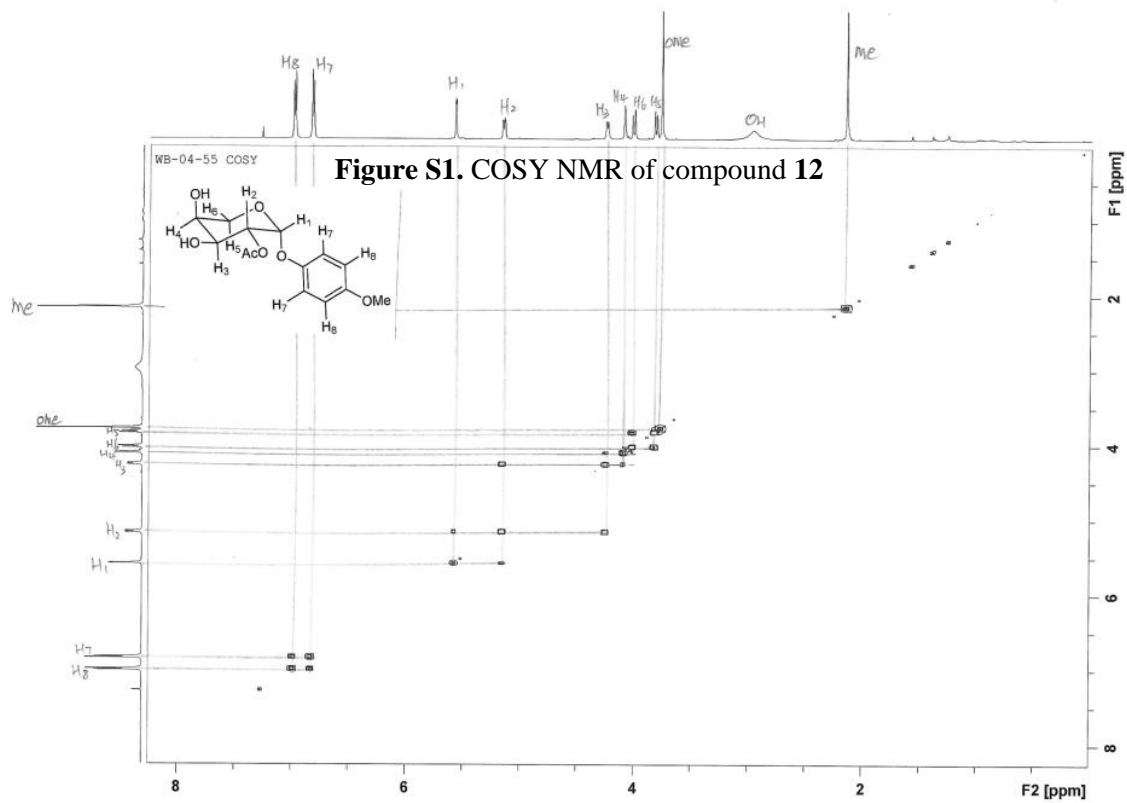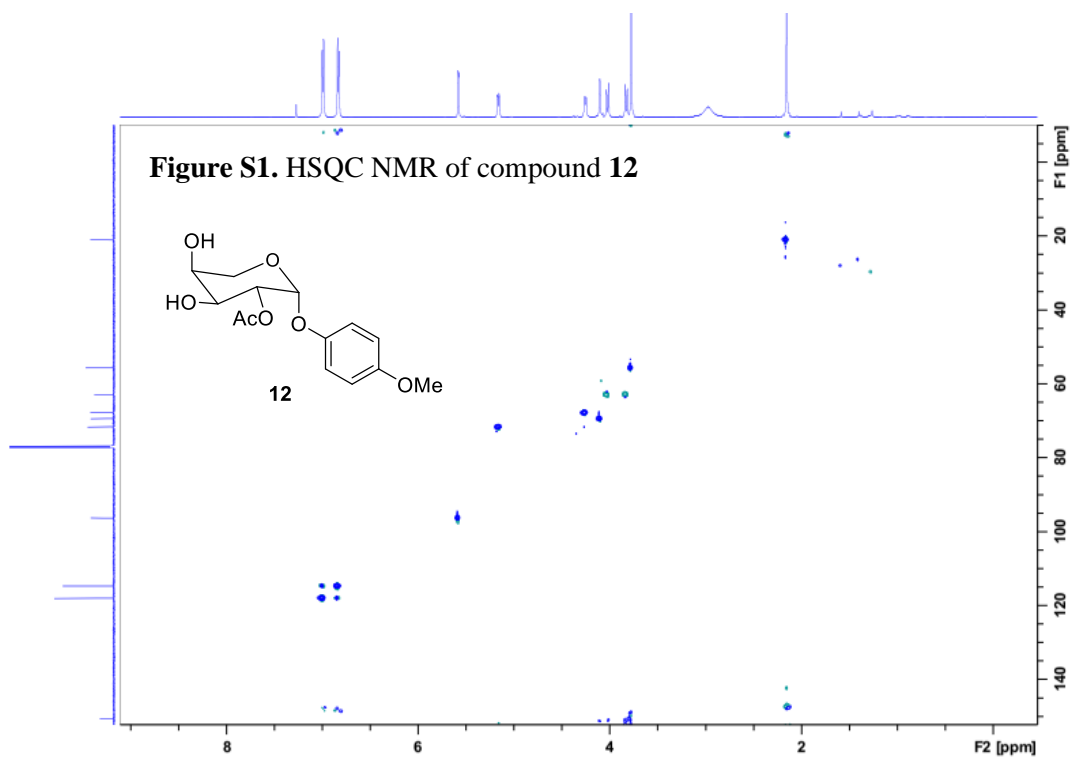

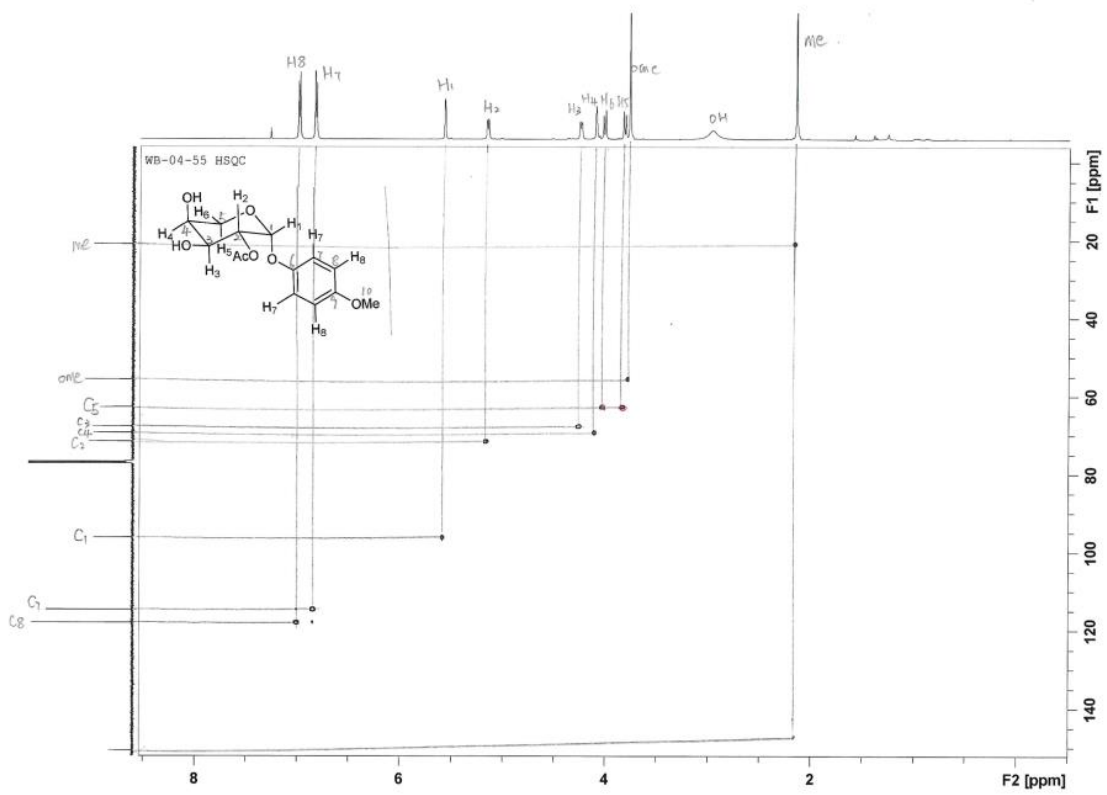

**Figure S1. HMBC NMR of compound 12**

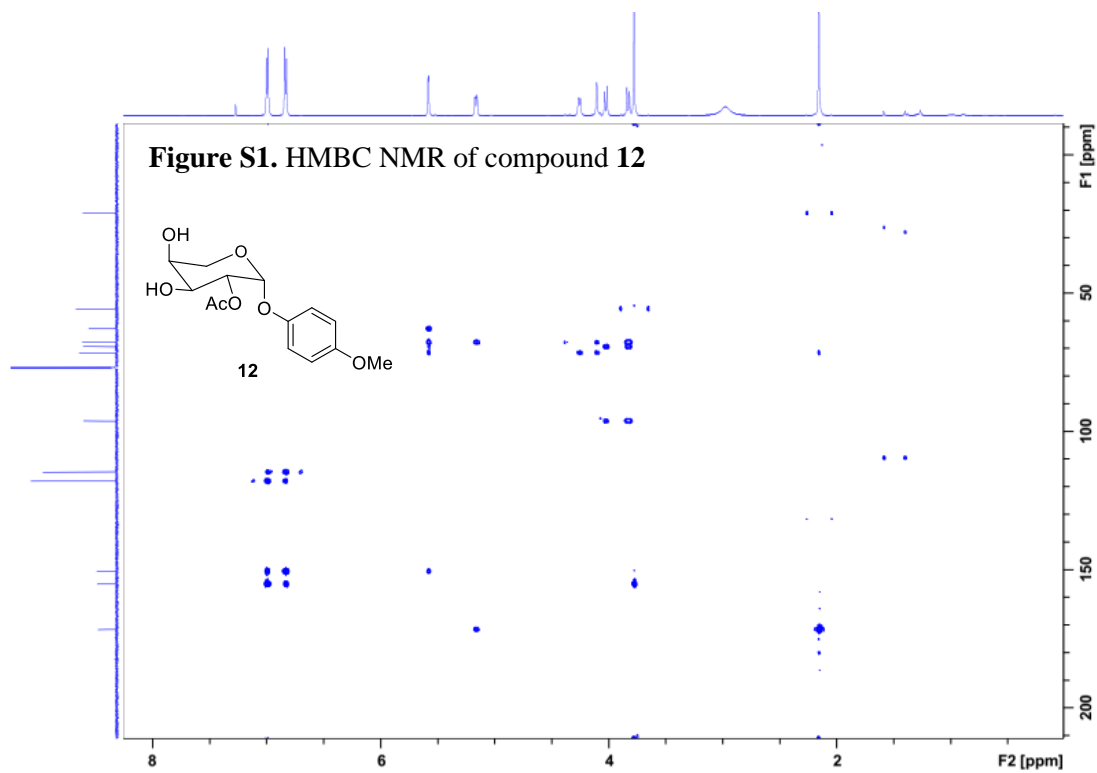



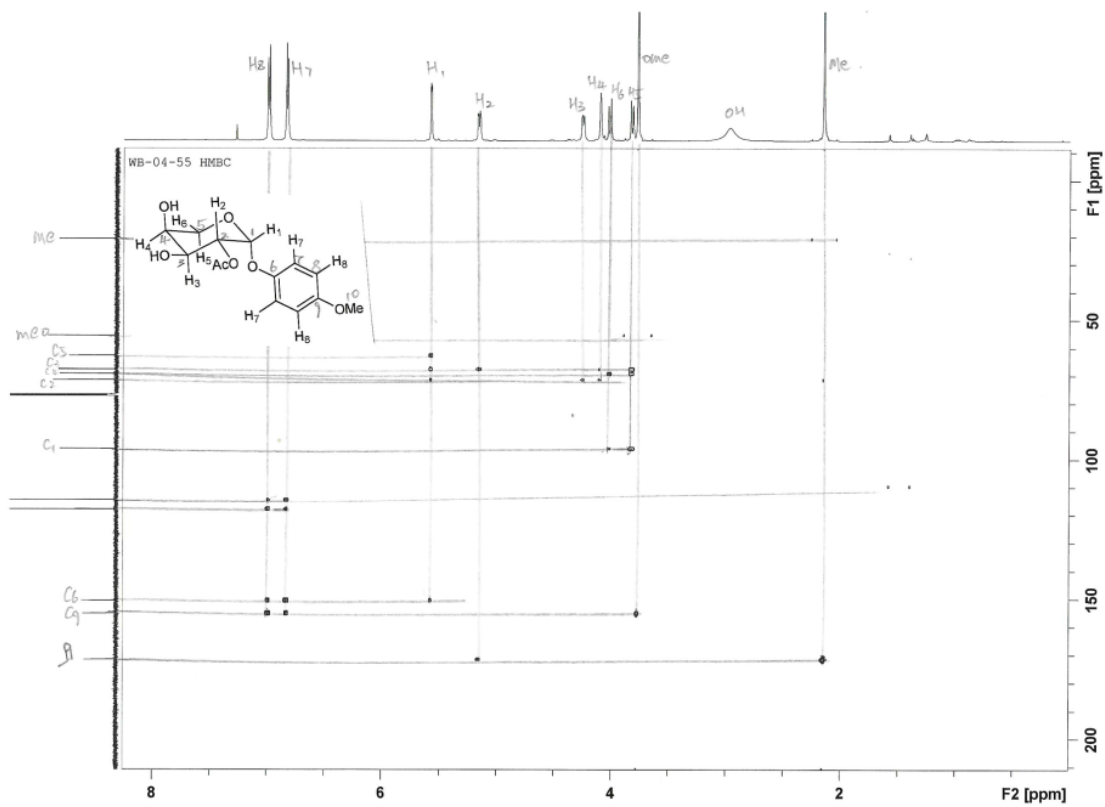

WB-04-57

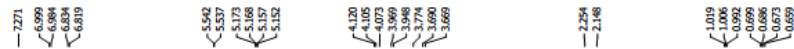

Figure S1.  $^1\text{H}$  NMR of compound 13a

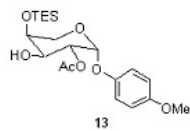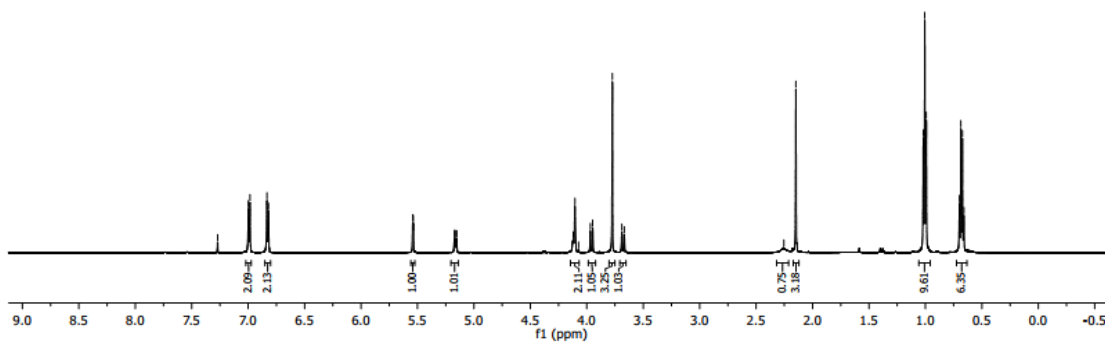

WB-04-57

171.198

155.120

150.772

117.996

114.593

96.532

77.212

77.000

76.788

76.576

70.568

67.877

63.840

55.637

21.002

6.689

4.883

**Figure S1.**  $^{13}\text{C}$  NMR of compound **13a**

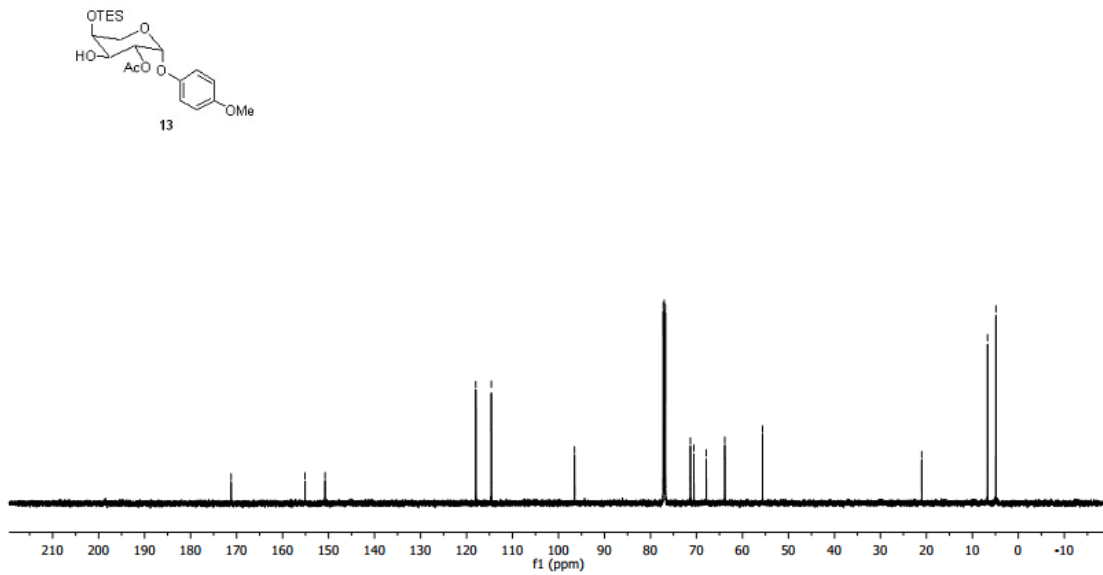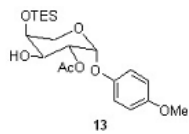

**Figure S1.** COSY NMR of compound **13a**

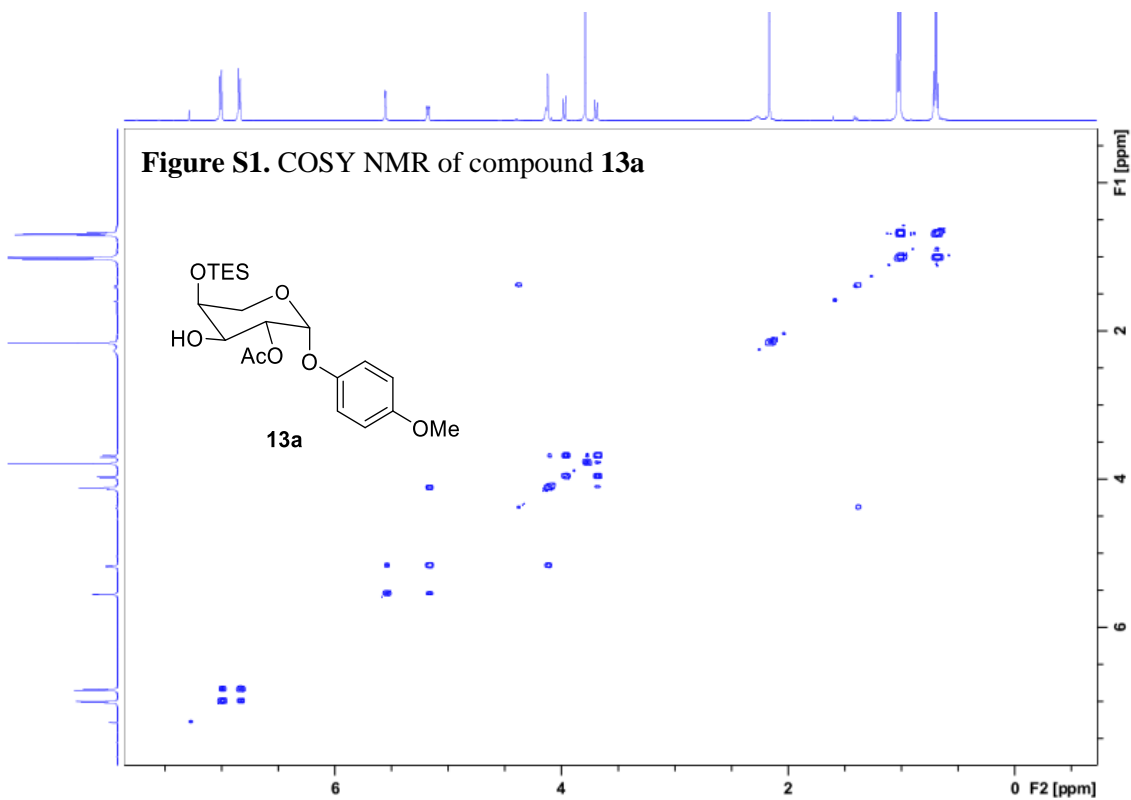

Figure S1. HSQC NMR of compound 13a

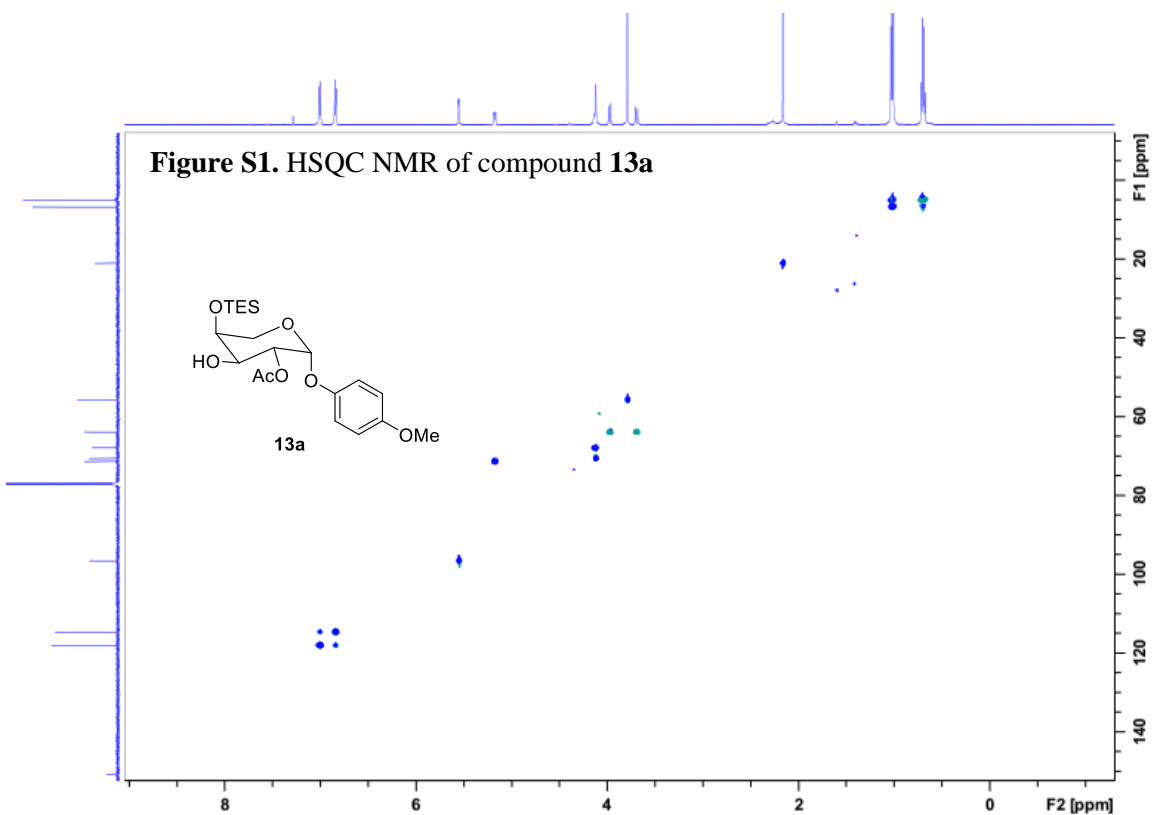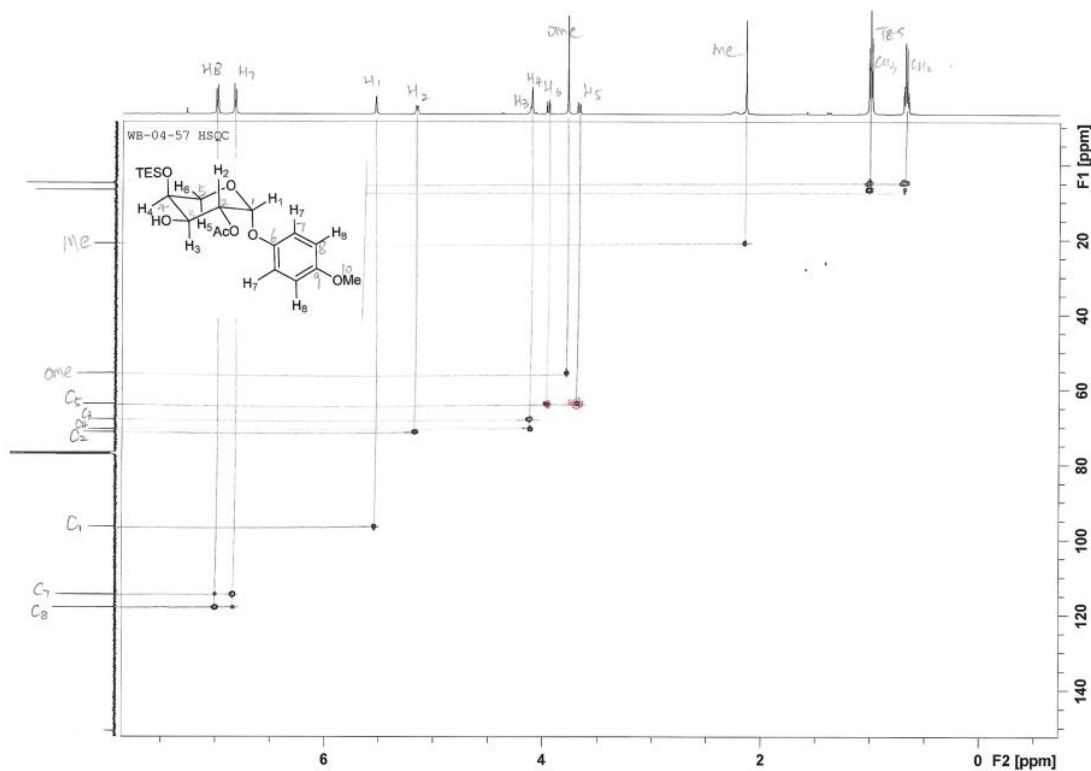

Figure S1. HMBC NMR of compound 13a

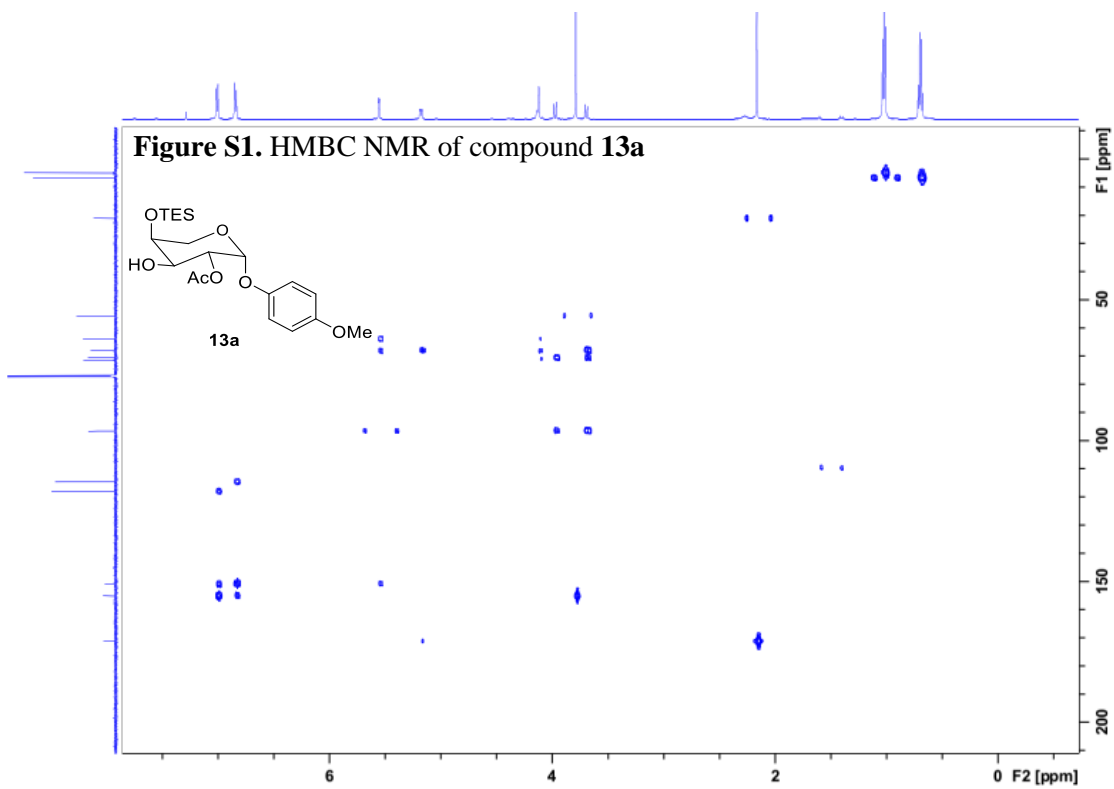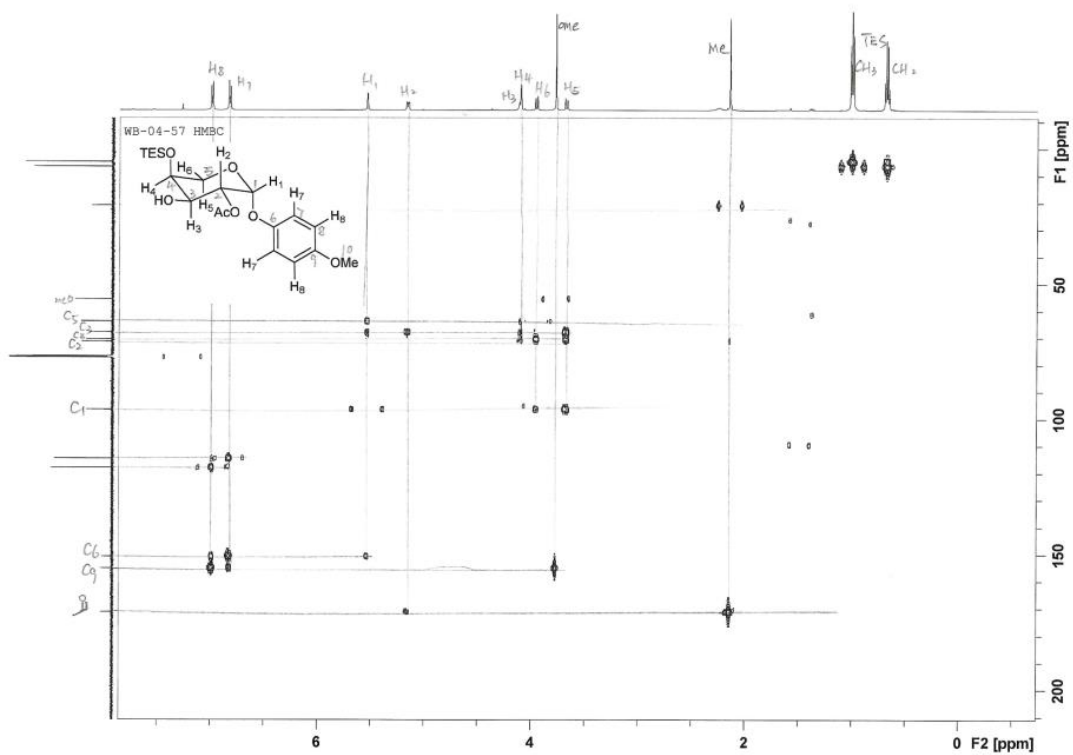

WB-04-57A

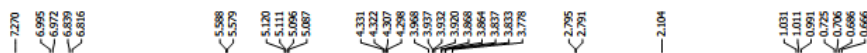

Figure S1.  $^1\text{H}$  NMR of compound **13b**

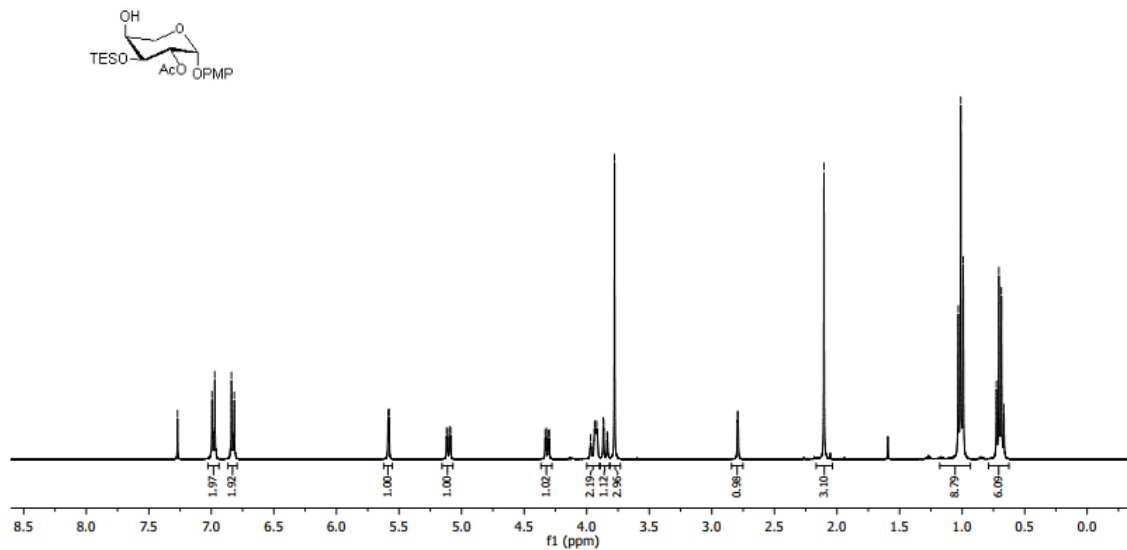

Figure S1.  $^{13}\text{C}$  NMR of compound **13b**

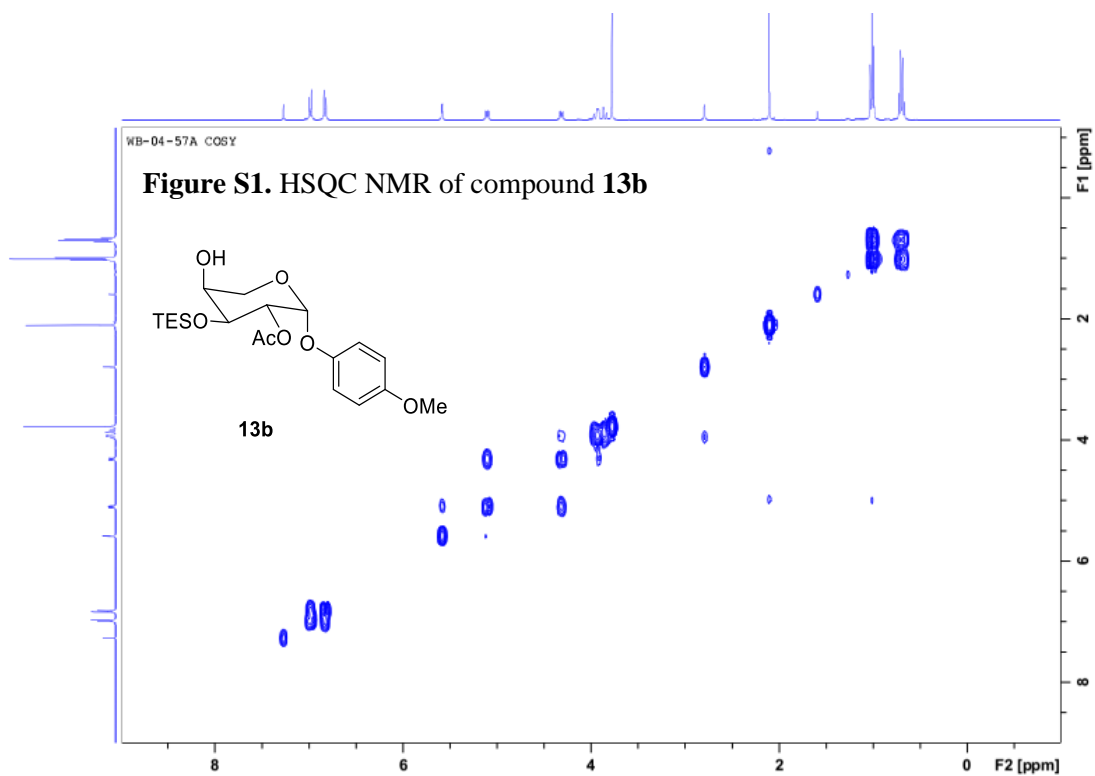

WB-04-67

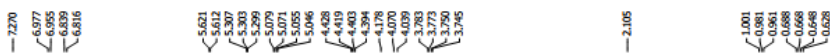

**Figure S1. <sup>1</sup>H NMR of compound WB-04-67**

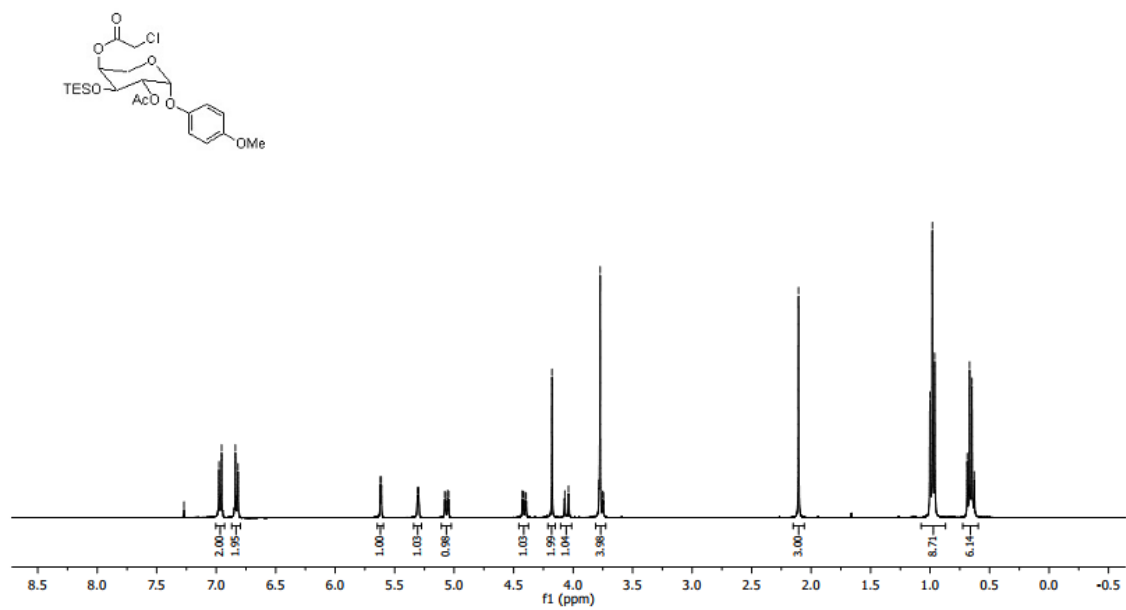

WB-04-67

170.374  
167.004  
155.278  
150.690  
118.004  
114.613  
96.345  
77.317  
77.060  
76.803  
73.543  
71.294  
66.173  
60.901  
55.603  
40.857  
20.833  
6.624  
4.695

**Figure S1.**  $^{13}\text{C}$  NMR of compound **WB-04-67**

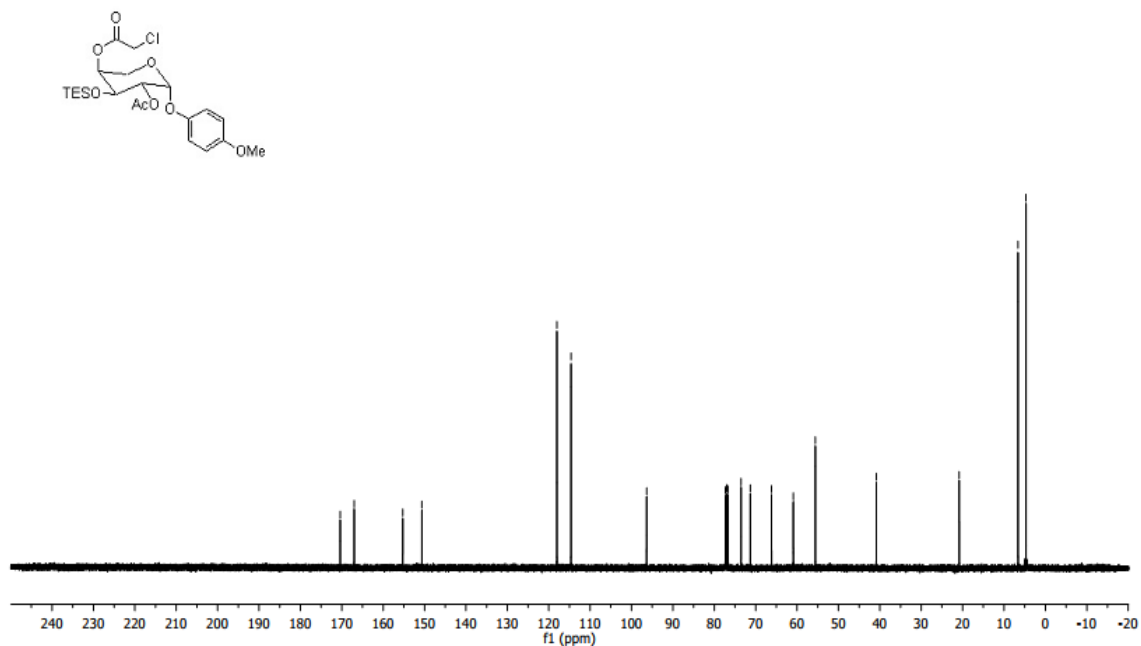

**Figure S1.** COSY NMR of compound **WB-04-67**

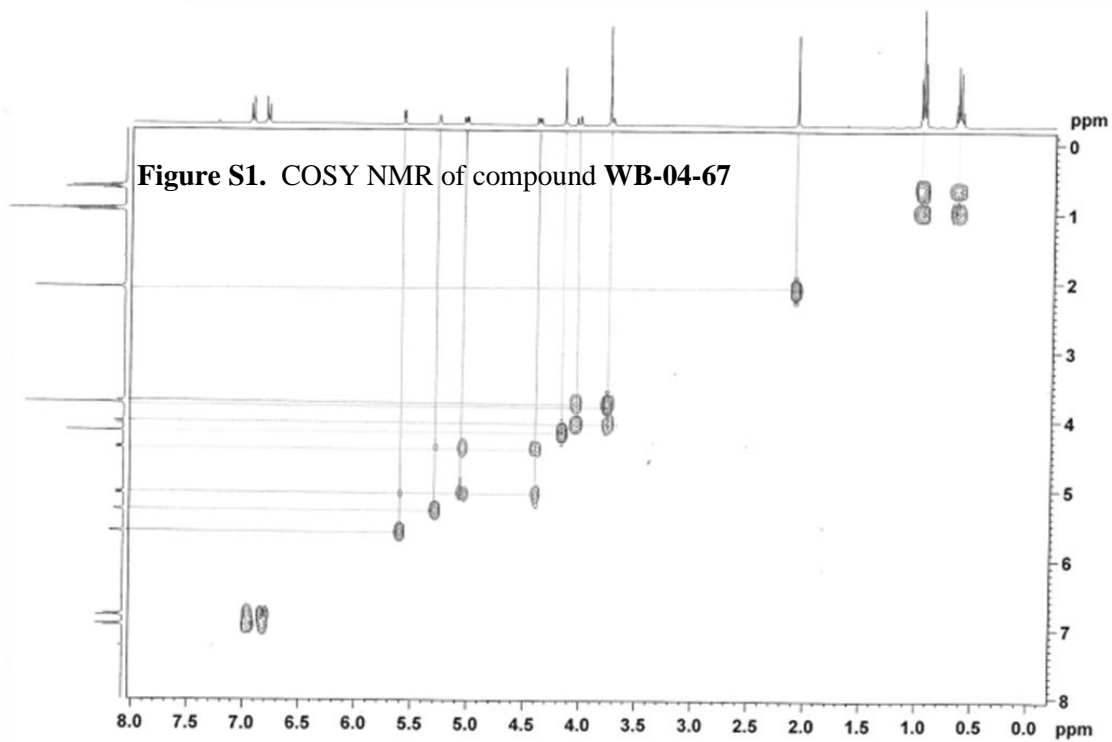

Figure S1. HSQC NMR of compound WB-04-67

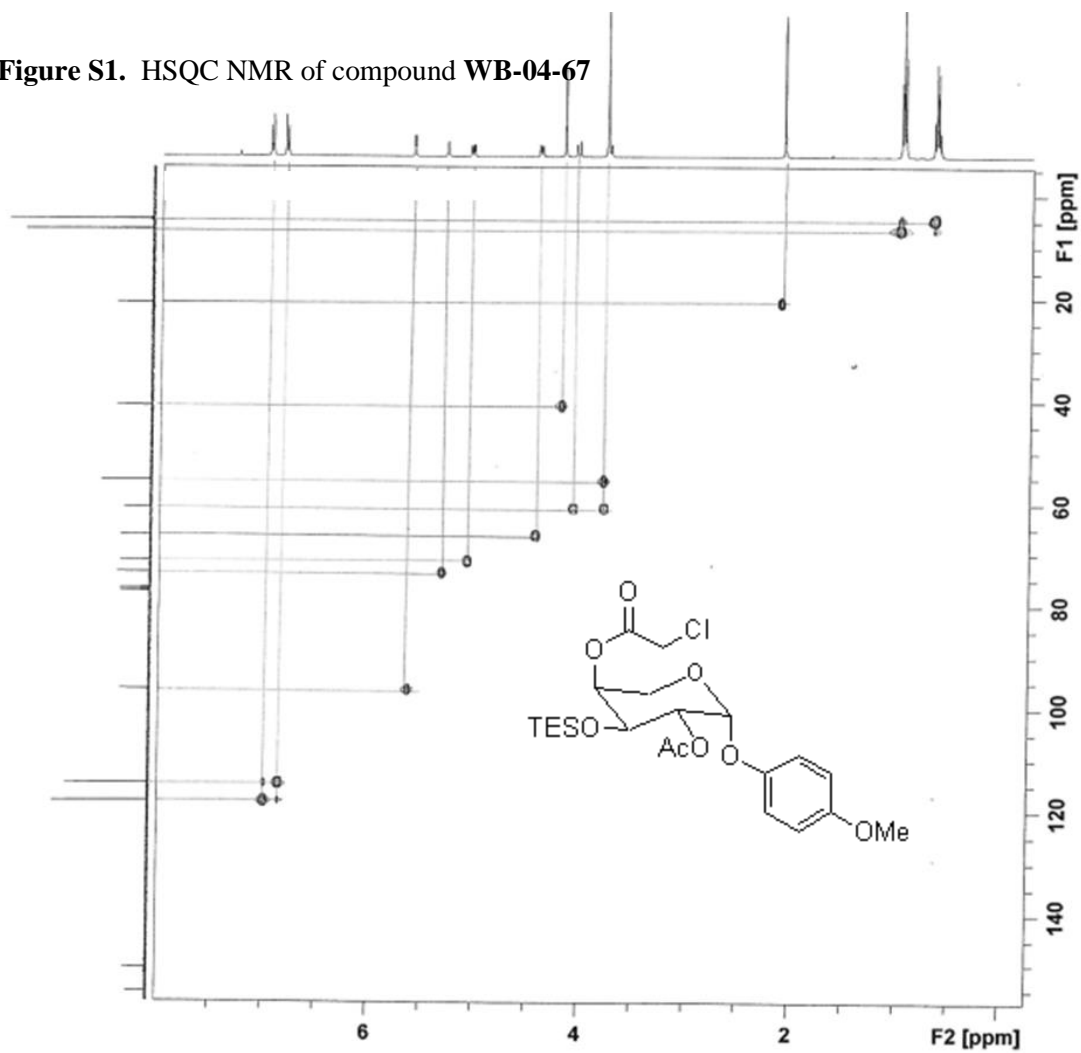



Figure S1. HMBC NMR of compound WB-04-67

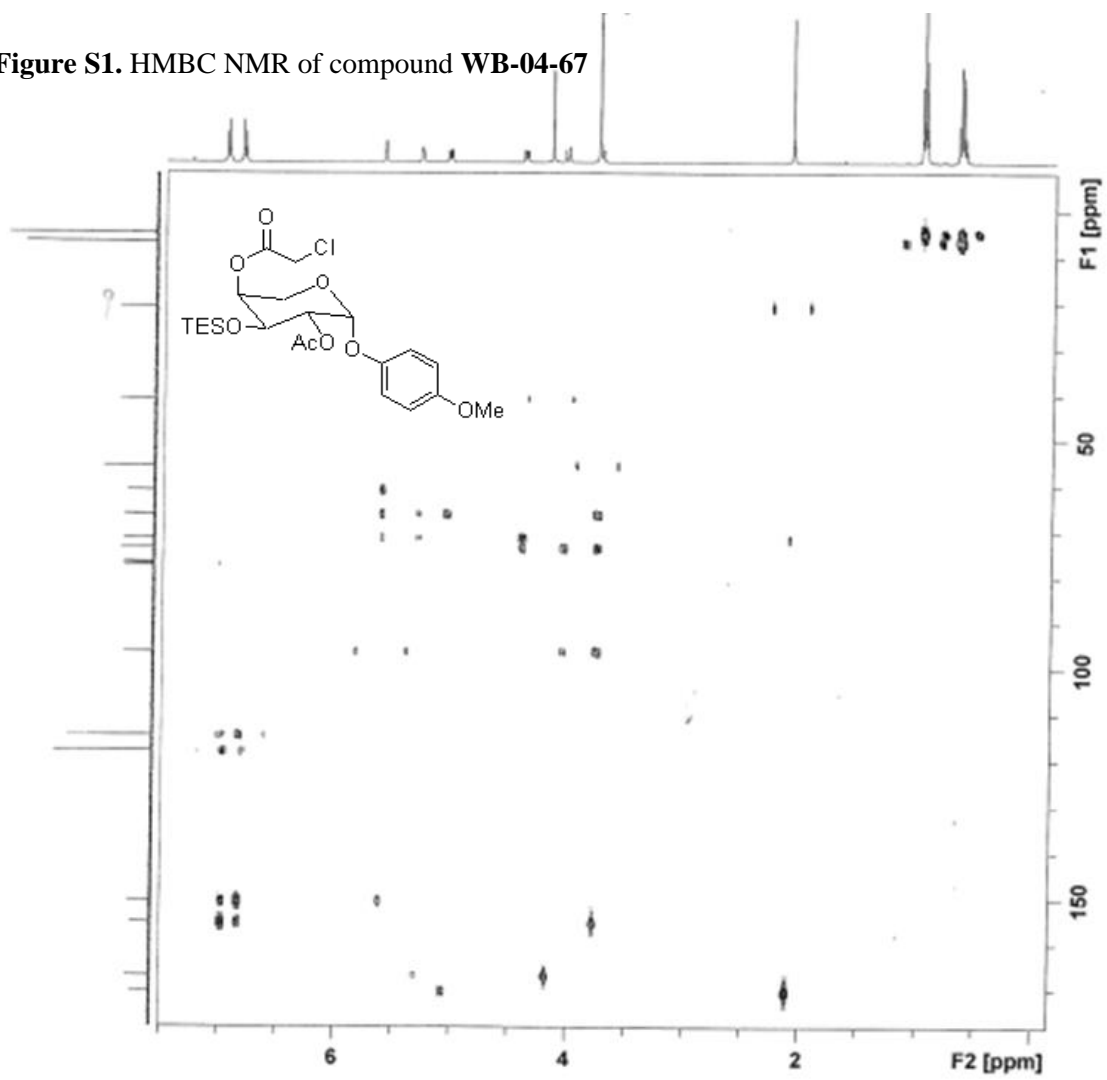

WB-05-46

7.975  
7.953  
7.270  
6.886  
6.877  
6.784  
6.761  
5.539  
5.531  
5.104  
5.096  
5.089  
5.072  
5.024  
4.994  
4.786  
4.172  
4.124  
4.117  
4.099  
4.092  
3.976  
3.959  
3.947  
3.891  
3.852  
3.824  
3.801  
3.783  
3.778  
3.766  
3.761  
3.728  
3.727  
3.567  
3.560  
3.288  
0.986  
0.966  
0.946  
0.927  
0.881  
0.861  
0.841  
0.663  
0.635  
0.615  
0.517  
0.515  
0.123

Figure S1. <sup>1</sup>H NMR of compound 15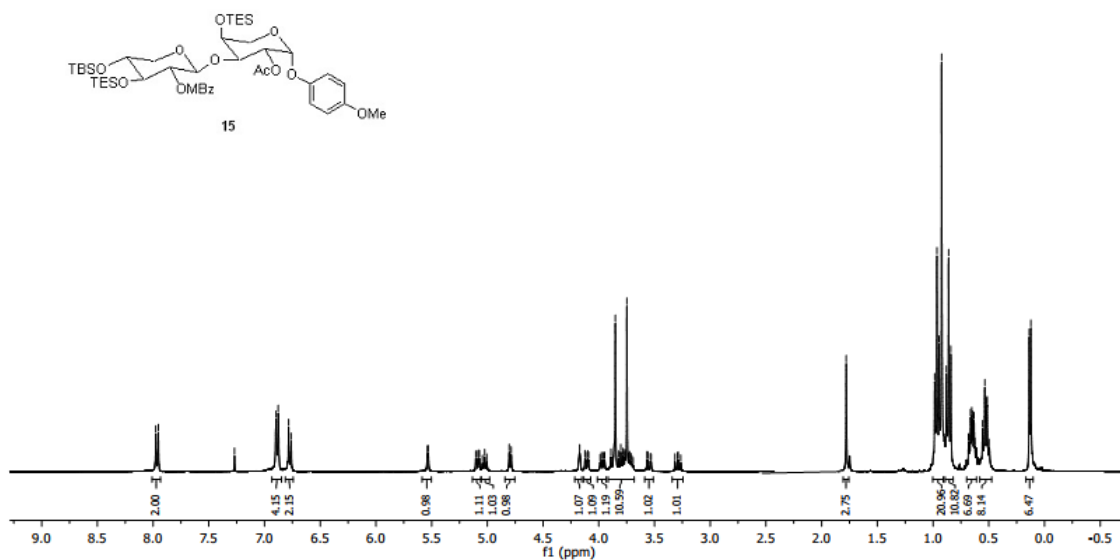

WB-05-46

169.986  
164.451  
163.250  
154.949  
150.732  
131.606  
122.745  
117.921  
114.495  
113.451  
102.524  
96.103  
77.317  
77.000  
76.682  
75.702  
74.584  
74.074  
73.665  
70.468  
69.867  
64.699  
55.572  
55.321  
25.927  
20.697  
18.079  
6.882  
6.782  
5.104  
4.801  
4.003  
4.619

Figure S1. <sup>13</sup>C NMR of compound 15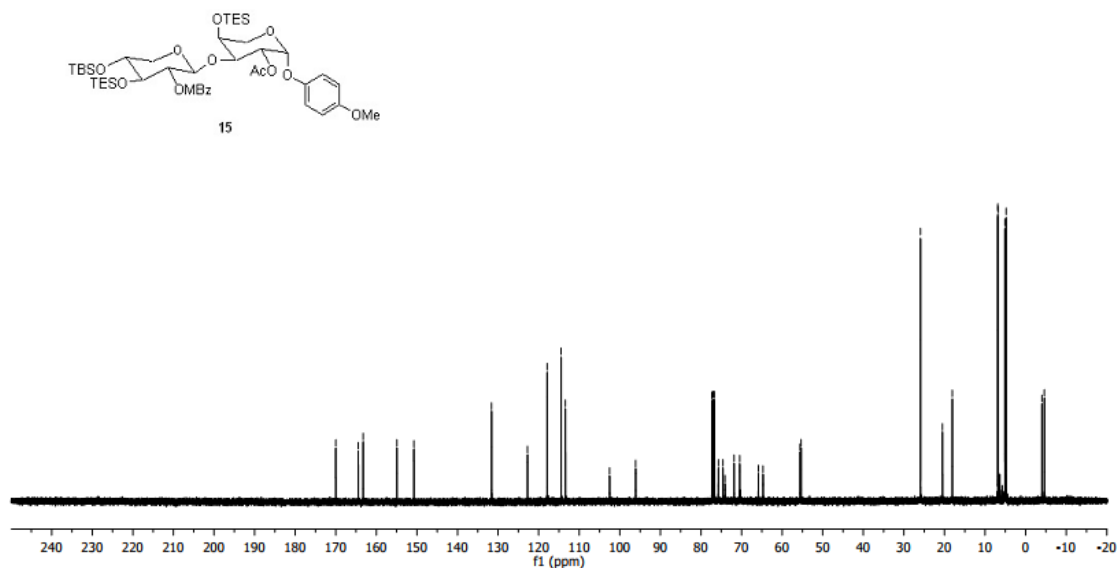

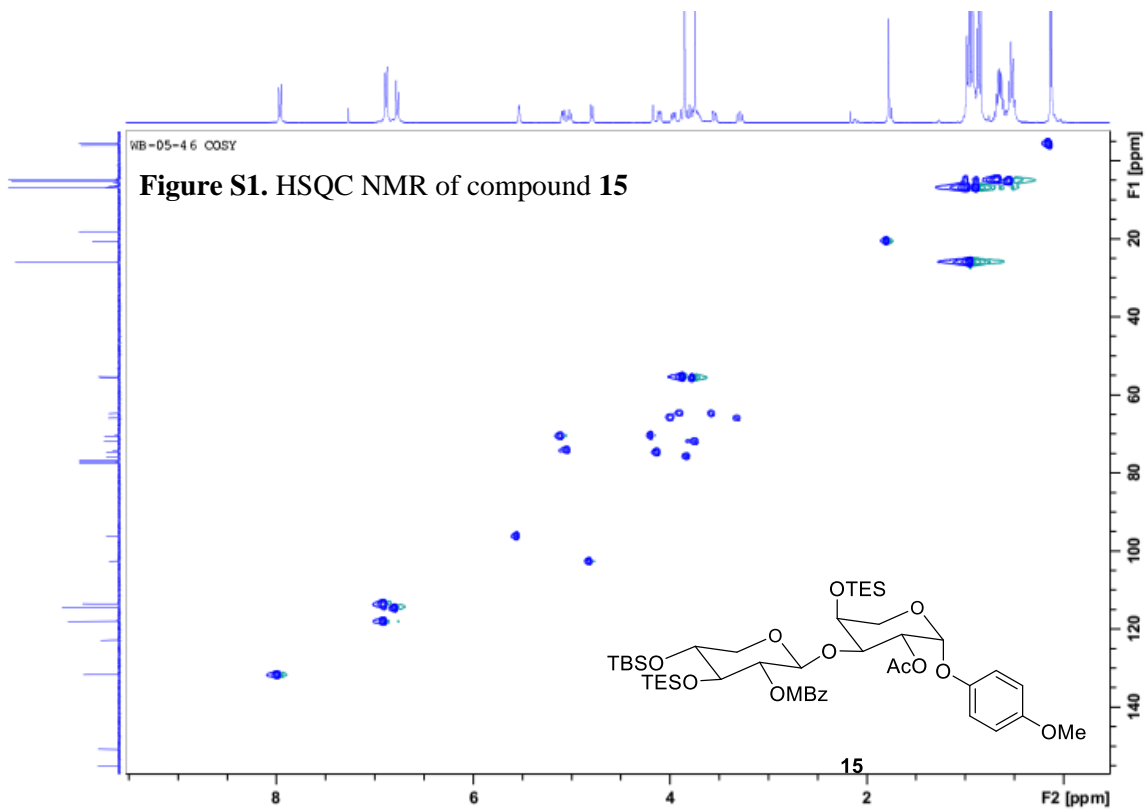

WB-5-49

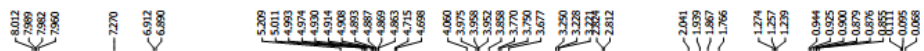

**Figure S1. <sup>1</sup>H NMR of compound 17**

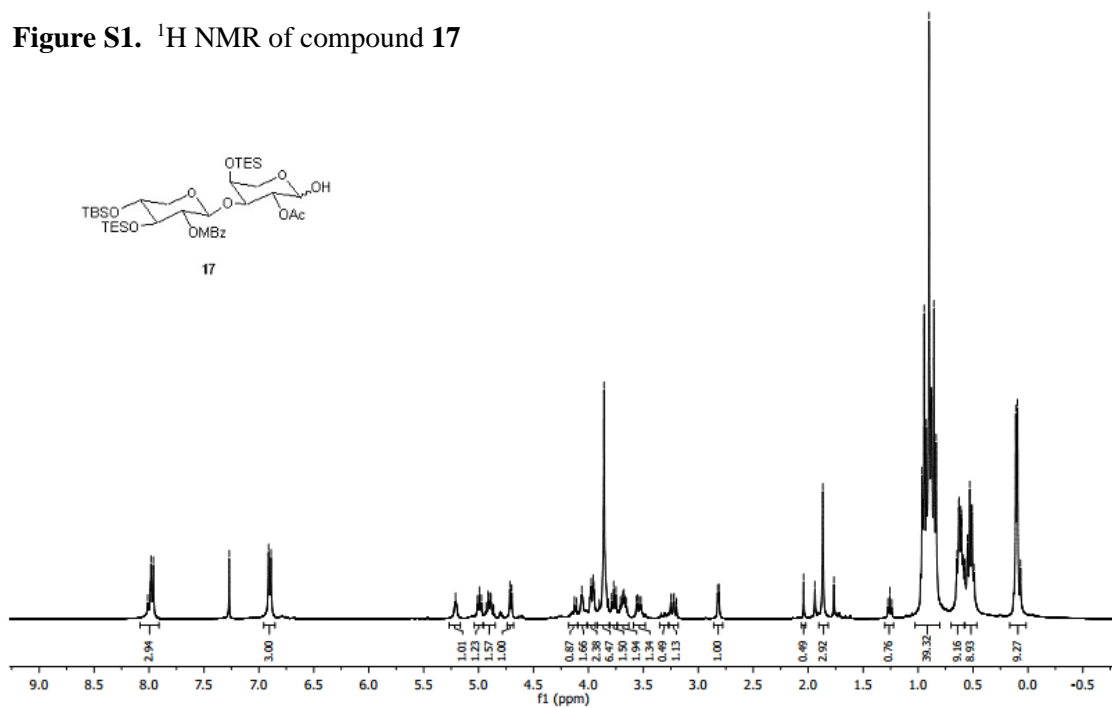

WB-05-49

169.993  
164.999  
163.307  
131.901  
131.679  
122.665  
113.491  
113.469  
101.949  
90.919  
77.318  
77.201  
77.000  
76.682  
74.498  
73.871  
70.871  
65.499  
58.332  
58.258  
25.918  
20.76  
20.64  
18.076  
6.548  
6.813  
6.746  
5.075  
4.762  
4.654

Figure S1.  $^{13}\text{C}$  NMR of compound 17

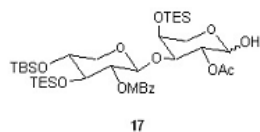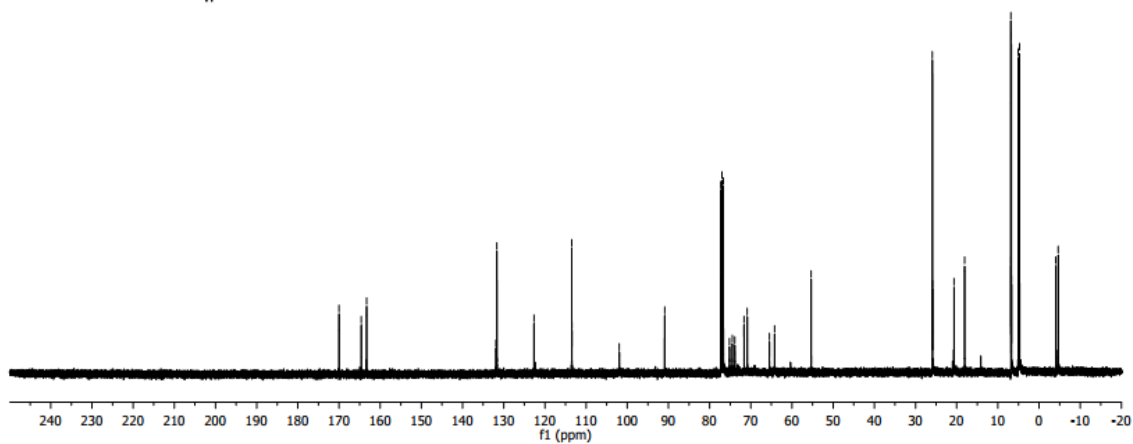

WB-05-52

8.499  
7.977  
7.951  
7.270  
6.911  
6.889  
6.429  
6.421  
5.205  
5.196  
5.171  
5.014  
4.995  
4.975  
4.955  
4.211  
3.982  
3.955  
3.942  
3.926  
3.906  
3.793  
3.689  
3.669  
3.256  
3.251  
3.228  
1.652  
1.597  
0.986  
0.966  
0.946  
0.916  
0.875  
0.855  
0.835  
0.528  
0.512  
0.370  
0.350  
0.115

Figure S1.  $^1\text{H}$  NMR of compound 18

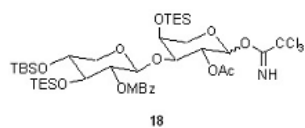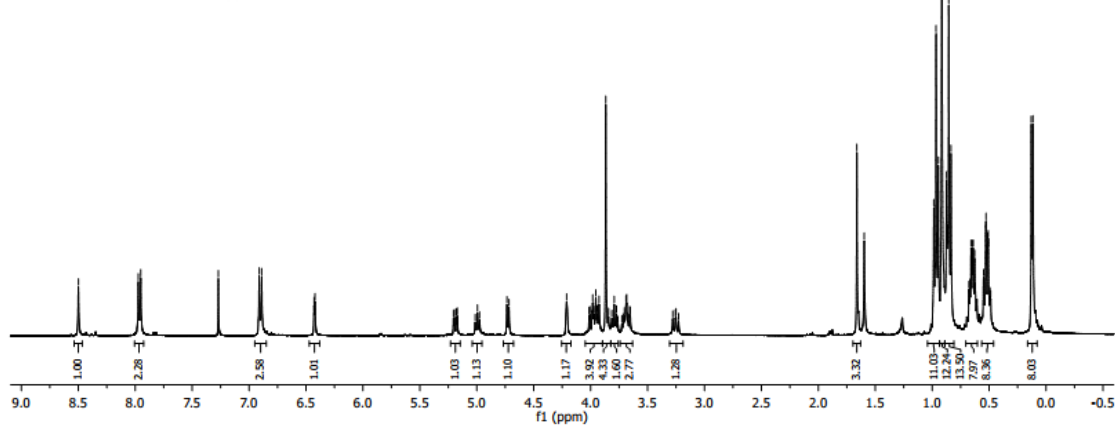

WB-05-52

160.728  
164.403  
163.287  
160.972

131.678

122.779

113.479

102.796

94.919

91.247

77.317

77.000

76.682

76.364

74.841

71.813

70.251

69.433

66.386

59.377

35.949

29.395

18.101

6.872

6.796

5.116

4.828

4.012

4.007

Figure S1.  $^{13}\text{C}$  NMR of compound 18

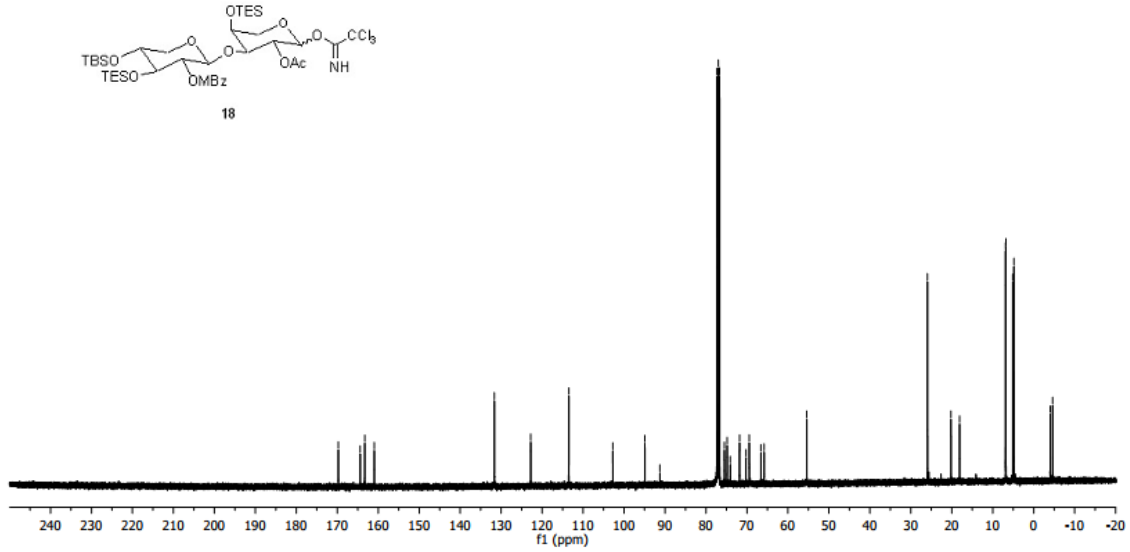

7.276  
5.326  
4.314  
4.304  
4.356  
3.695  
3.684  
3.672  
3.600  
3.605  
3.435  
3.421  
3.389  
3.373  
3.365  
3.348  
2.256  
2.243  
2.224  
2.200  
2.195  
2.185  
2.181  
2.030  
2.021  
2.007  
1.999  
1.989  
1.986  
1.889  
1.883  
1.824  
1.817  
1.799  
1.791  
1.781  
1.658  
1.628  
1.618  
1.593  
1.594  
1.594  
1.557  
1.557  
1.550  
1.517  
1.498  
1.489  
1.475  
1.475  
1.380  
1.380  
1.364  
1.353  
1.342  
1.340  
1.340  
1.206  
1.183  
1.172  
1.158  
1.150  
1.139  
1.129  
1.115  
1.103  
1.093  
1.078  
1.071  
1.071  
1.042  
1.032  
1.032  
0.998  
0.982  
0.966  
0.966  
0.923  
0.900  
0.896  
0.880  
0.883  
0.883  
0.063  
0.043

Figure S1.  $^1\text{H}$  NMR of compound 20

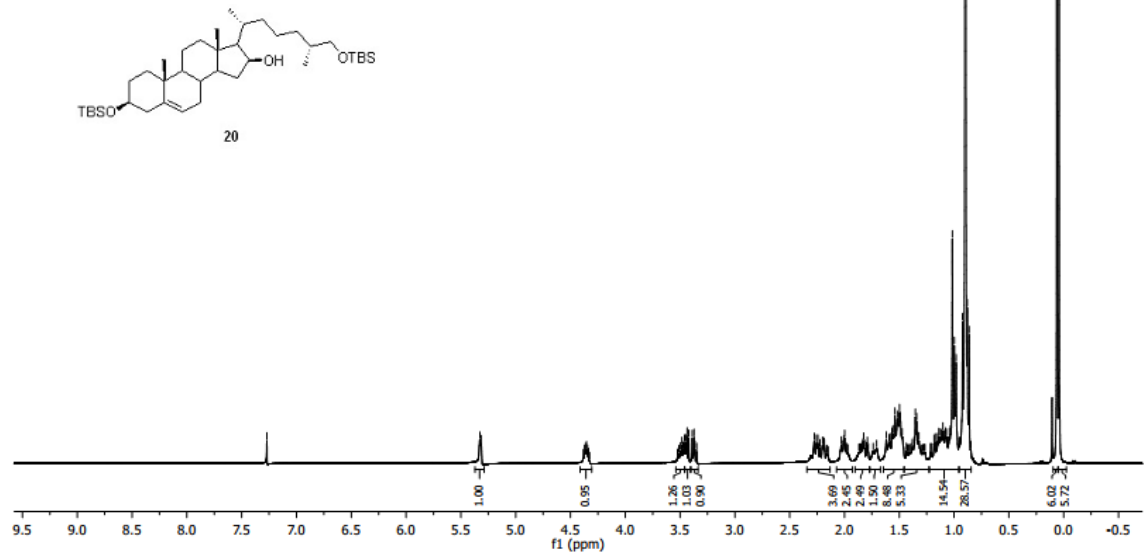

WB-04-33

Figure S1.  $^{13}\text{C}$  NMR of compound 20

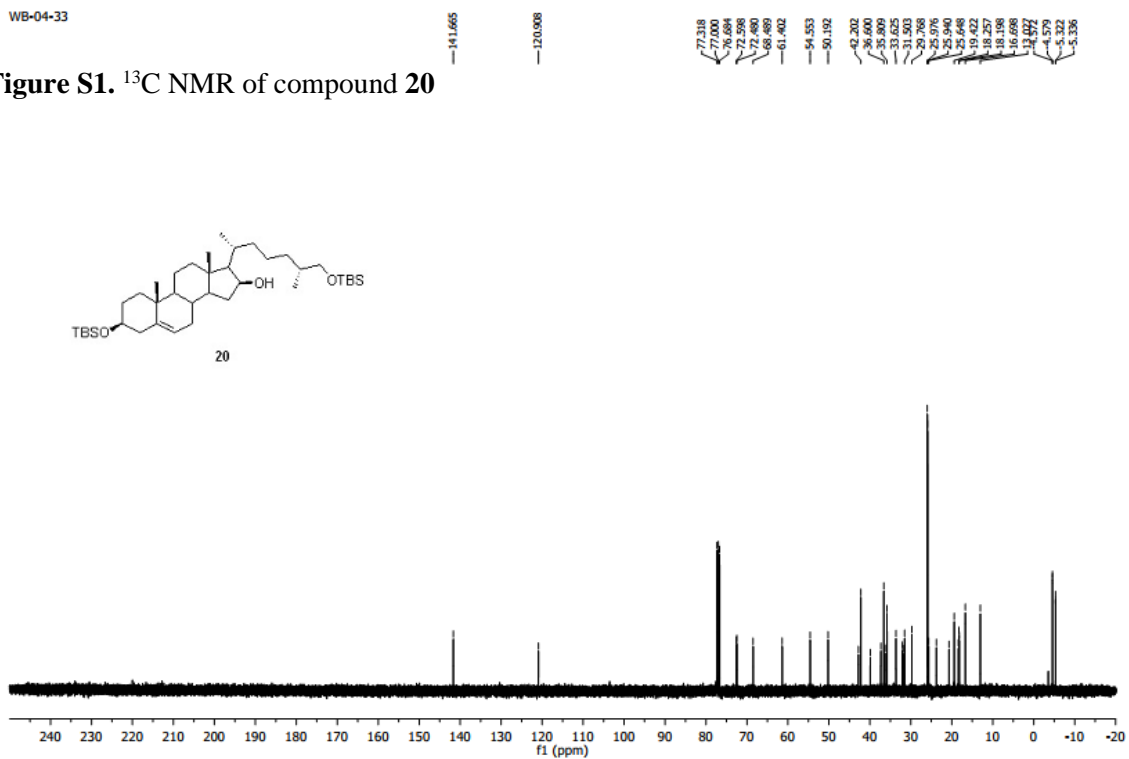

Figure S1.  $^1\text{H}$  NMR of compound 21

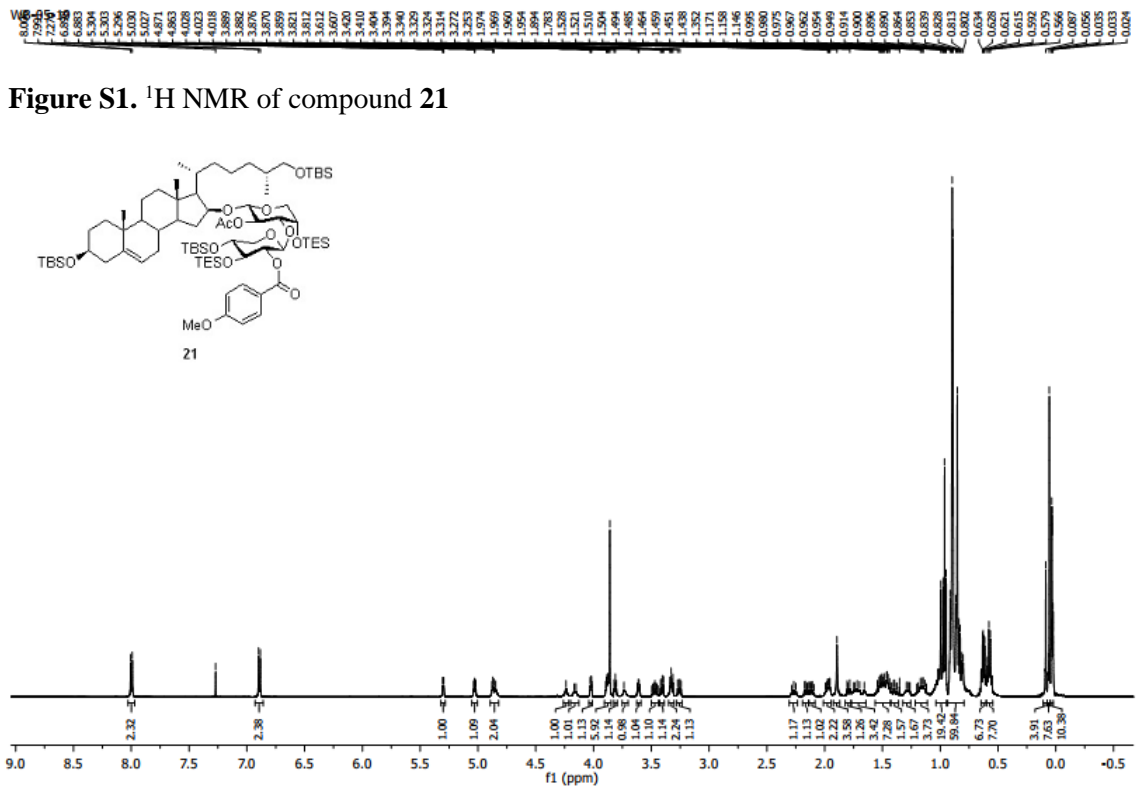

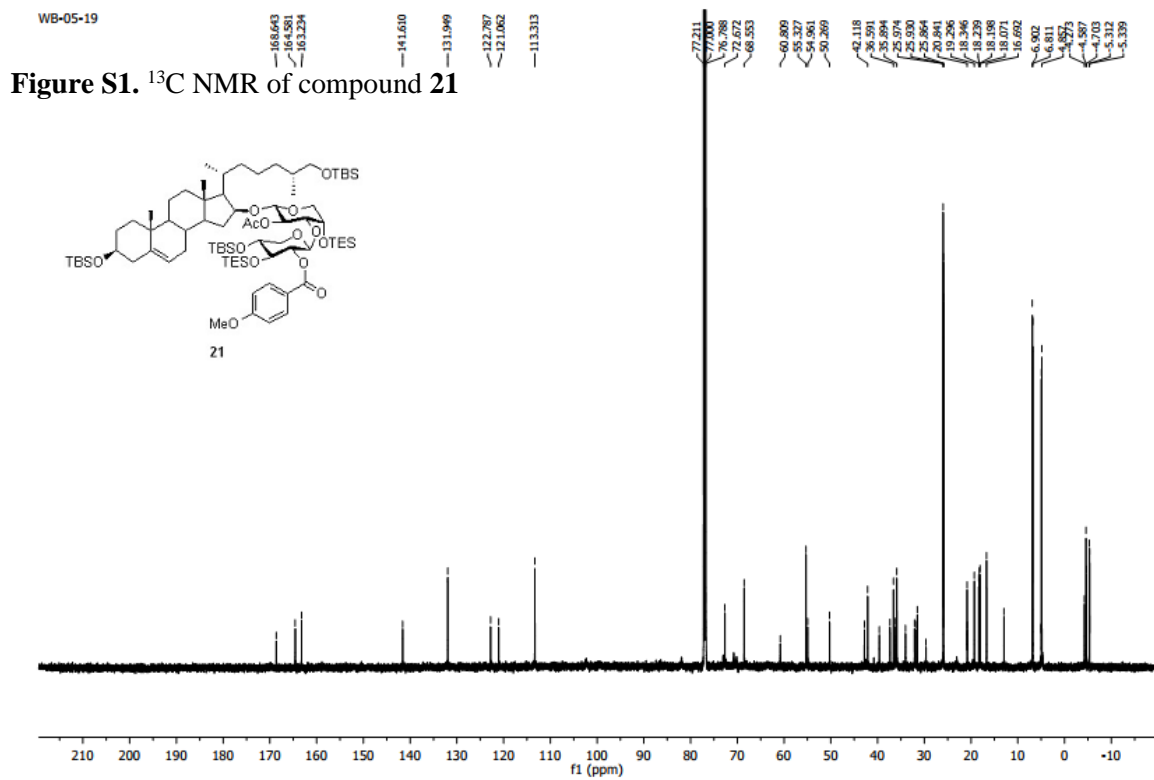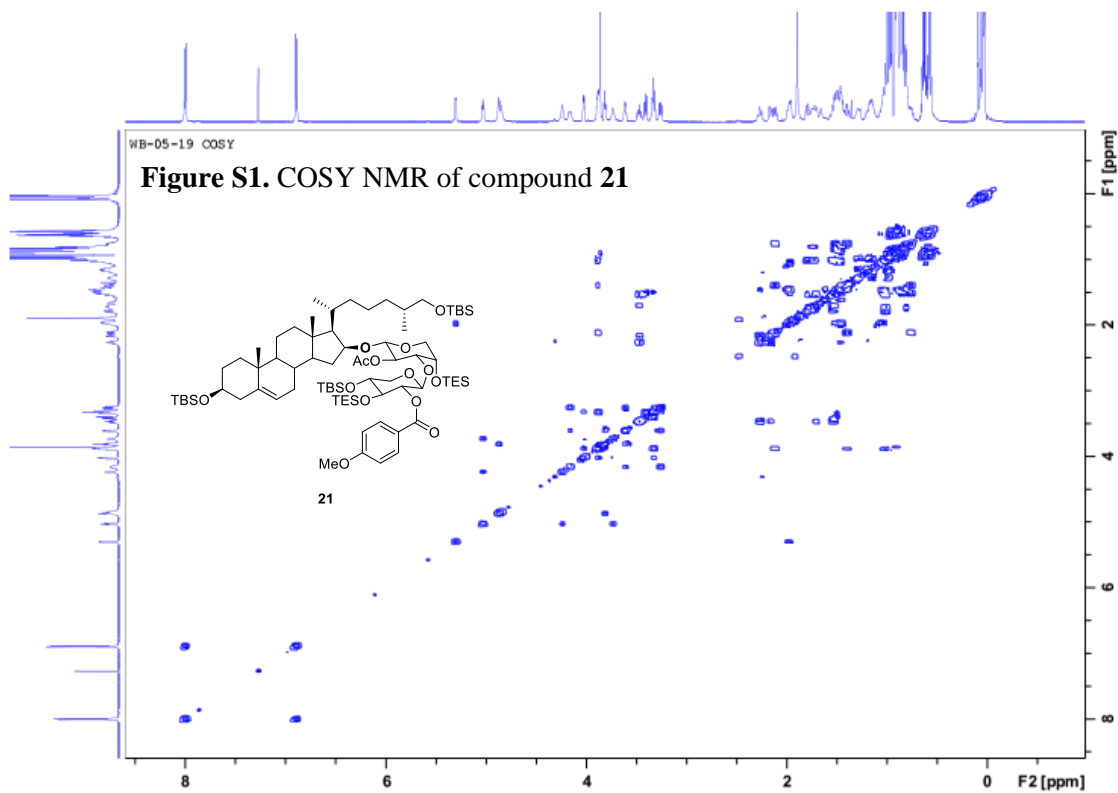

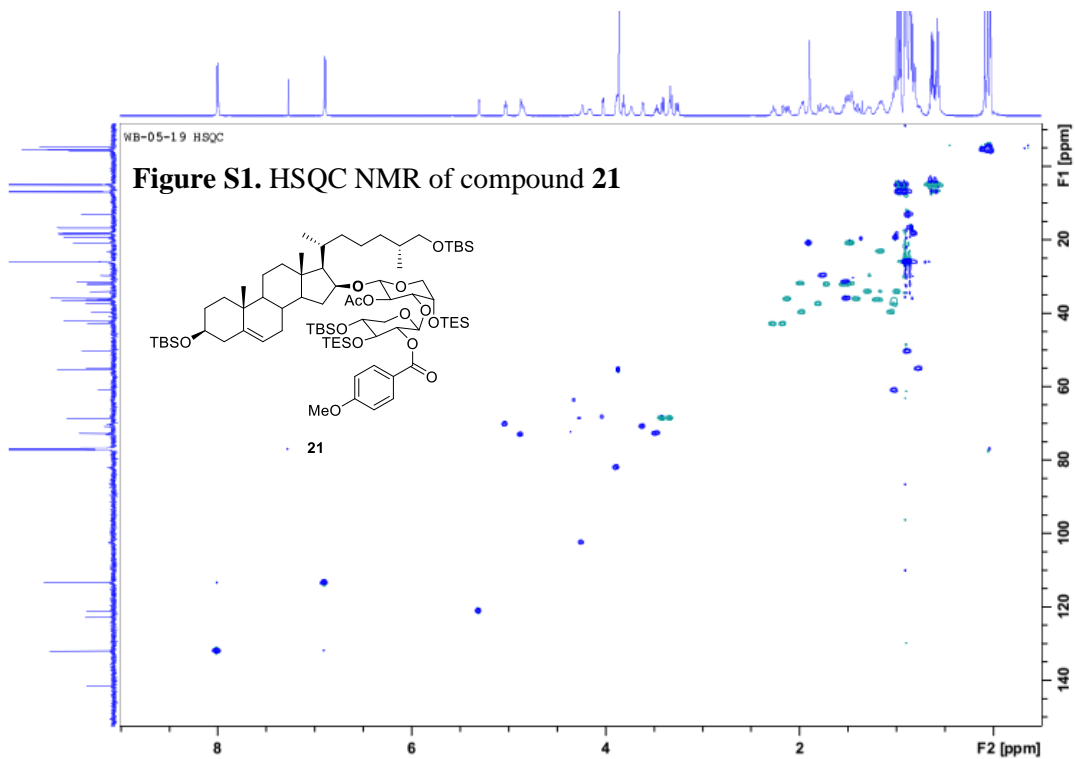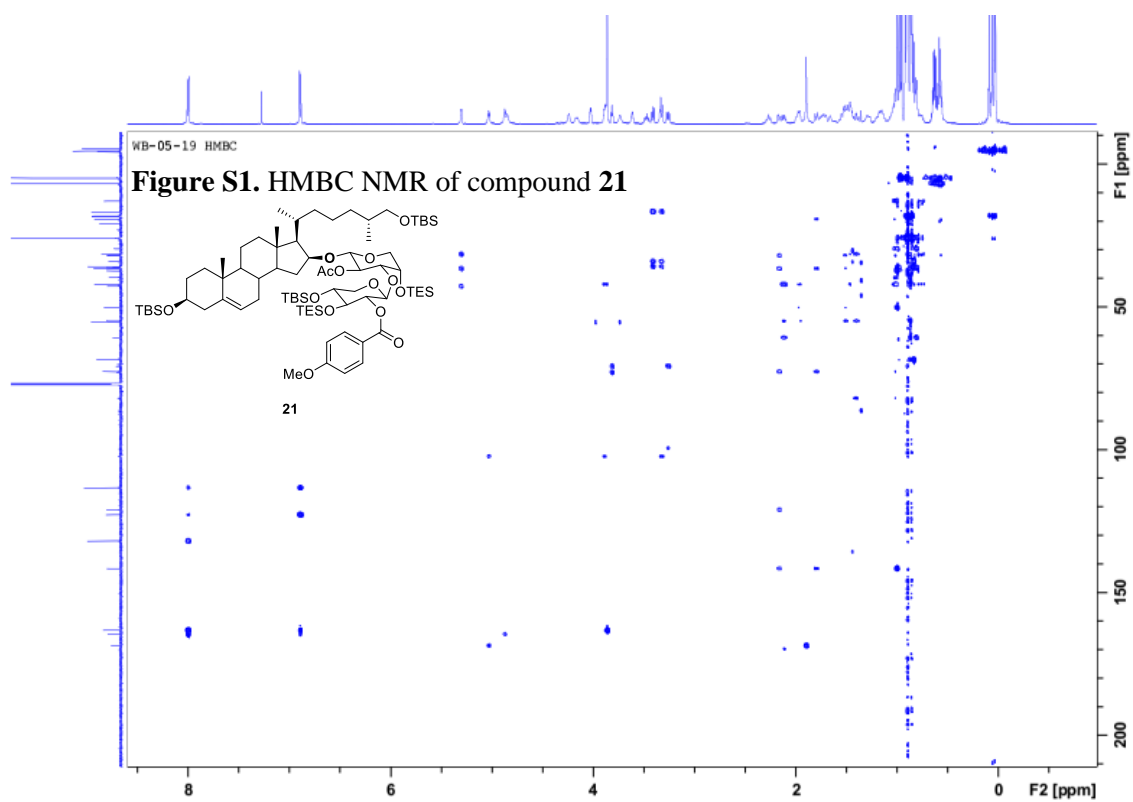



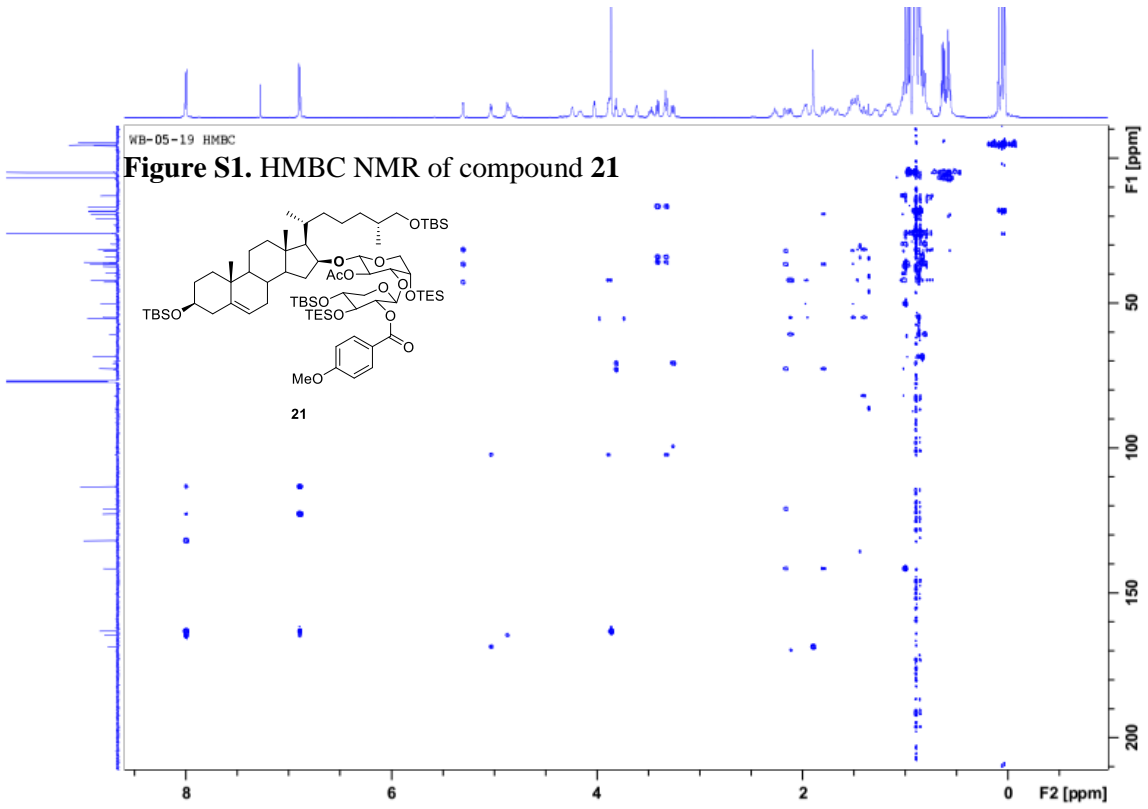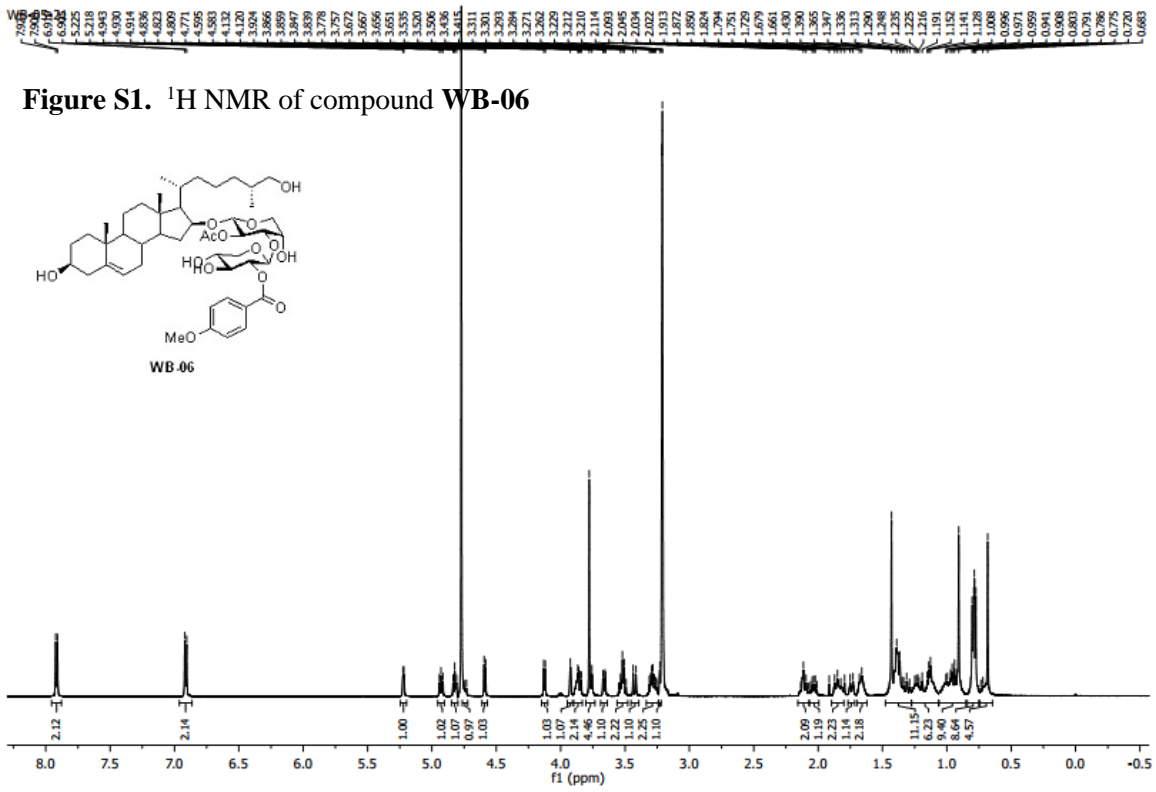

WB-06-86

Figure S1.  $^{13}\text{C}$  NMR of compound WB-06

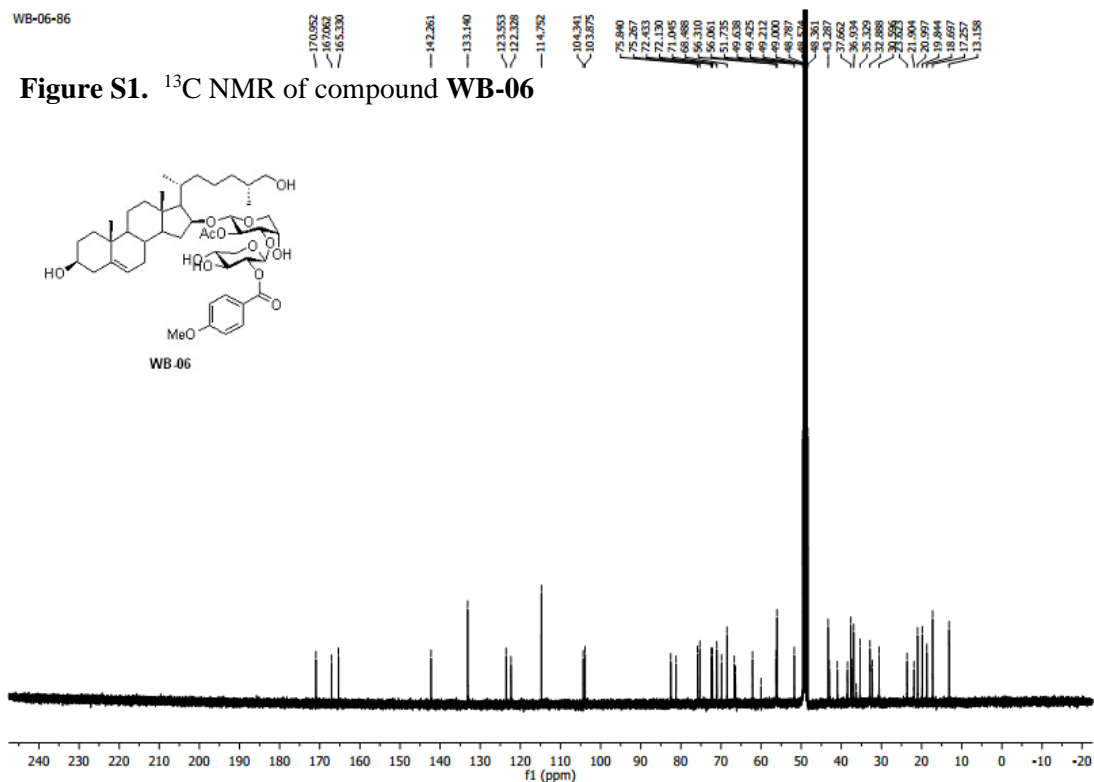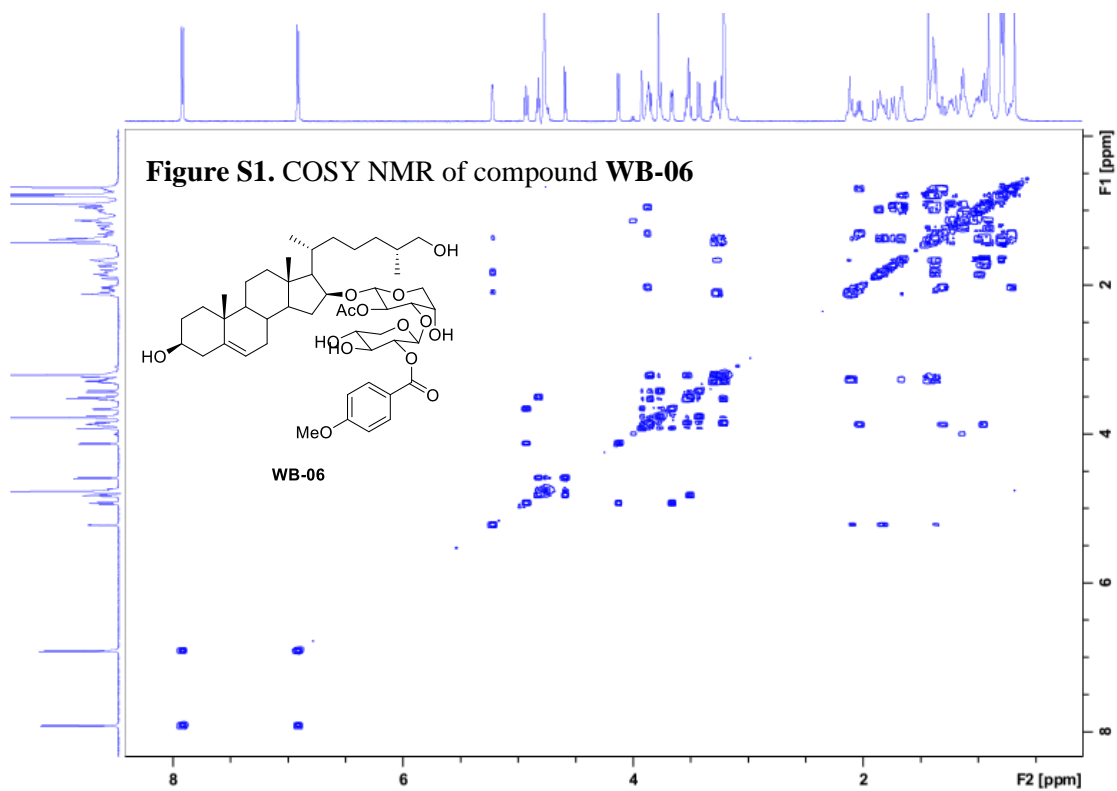

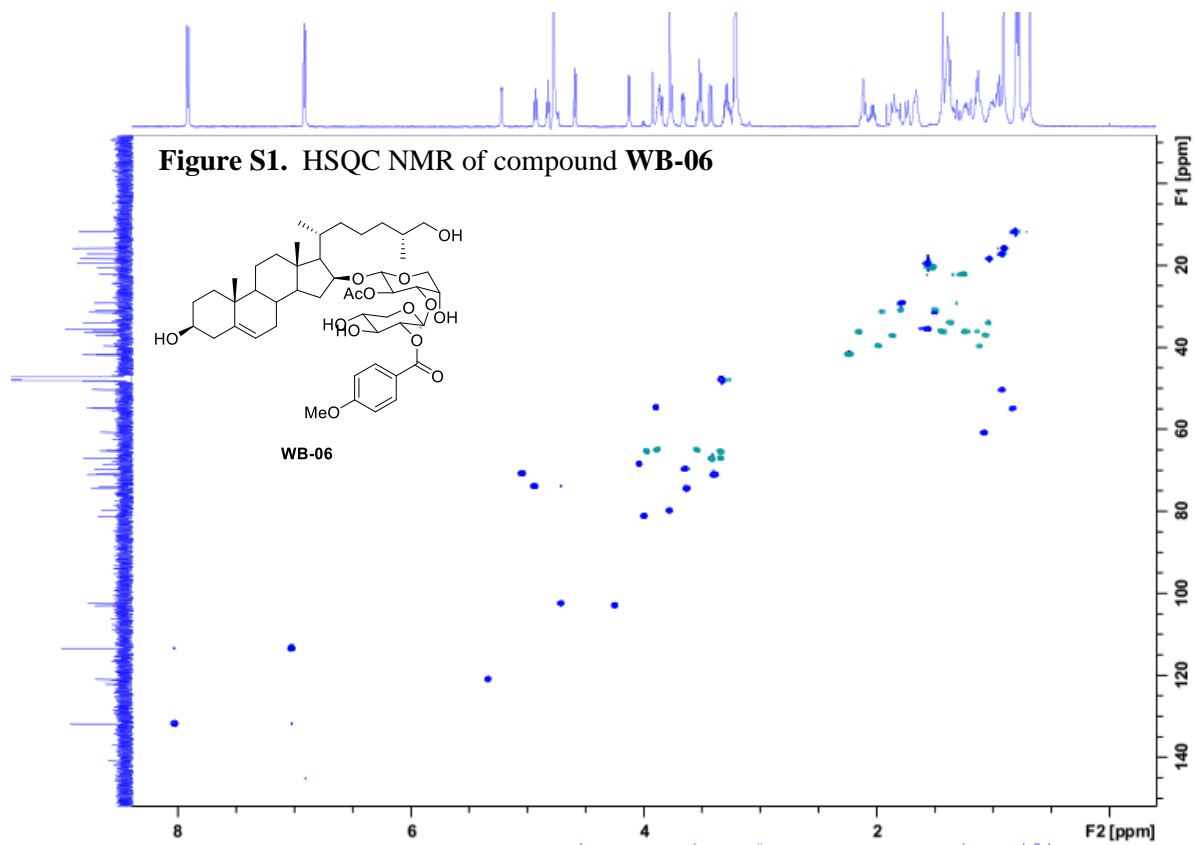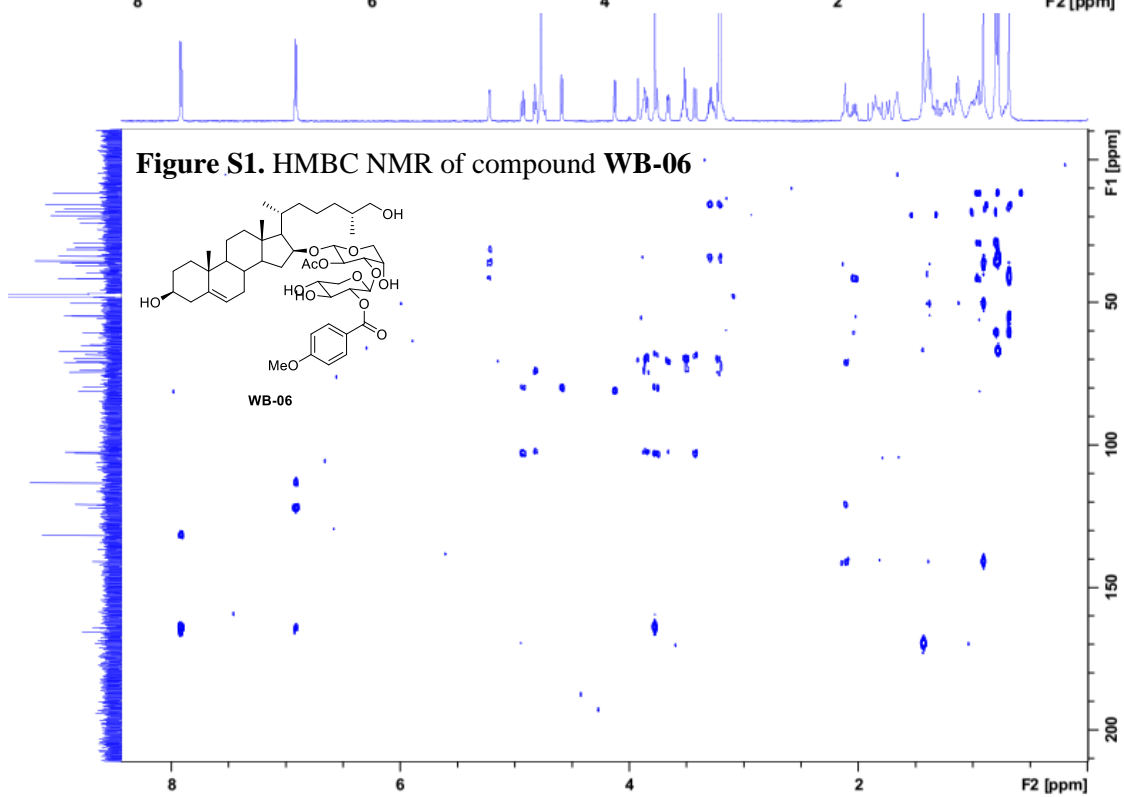

Figure S1. COSY NMR of compound WB-06

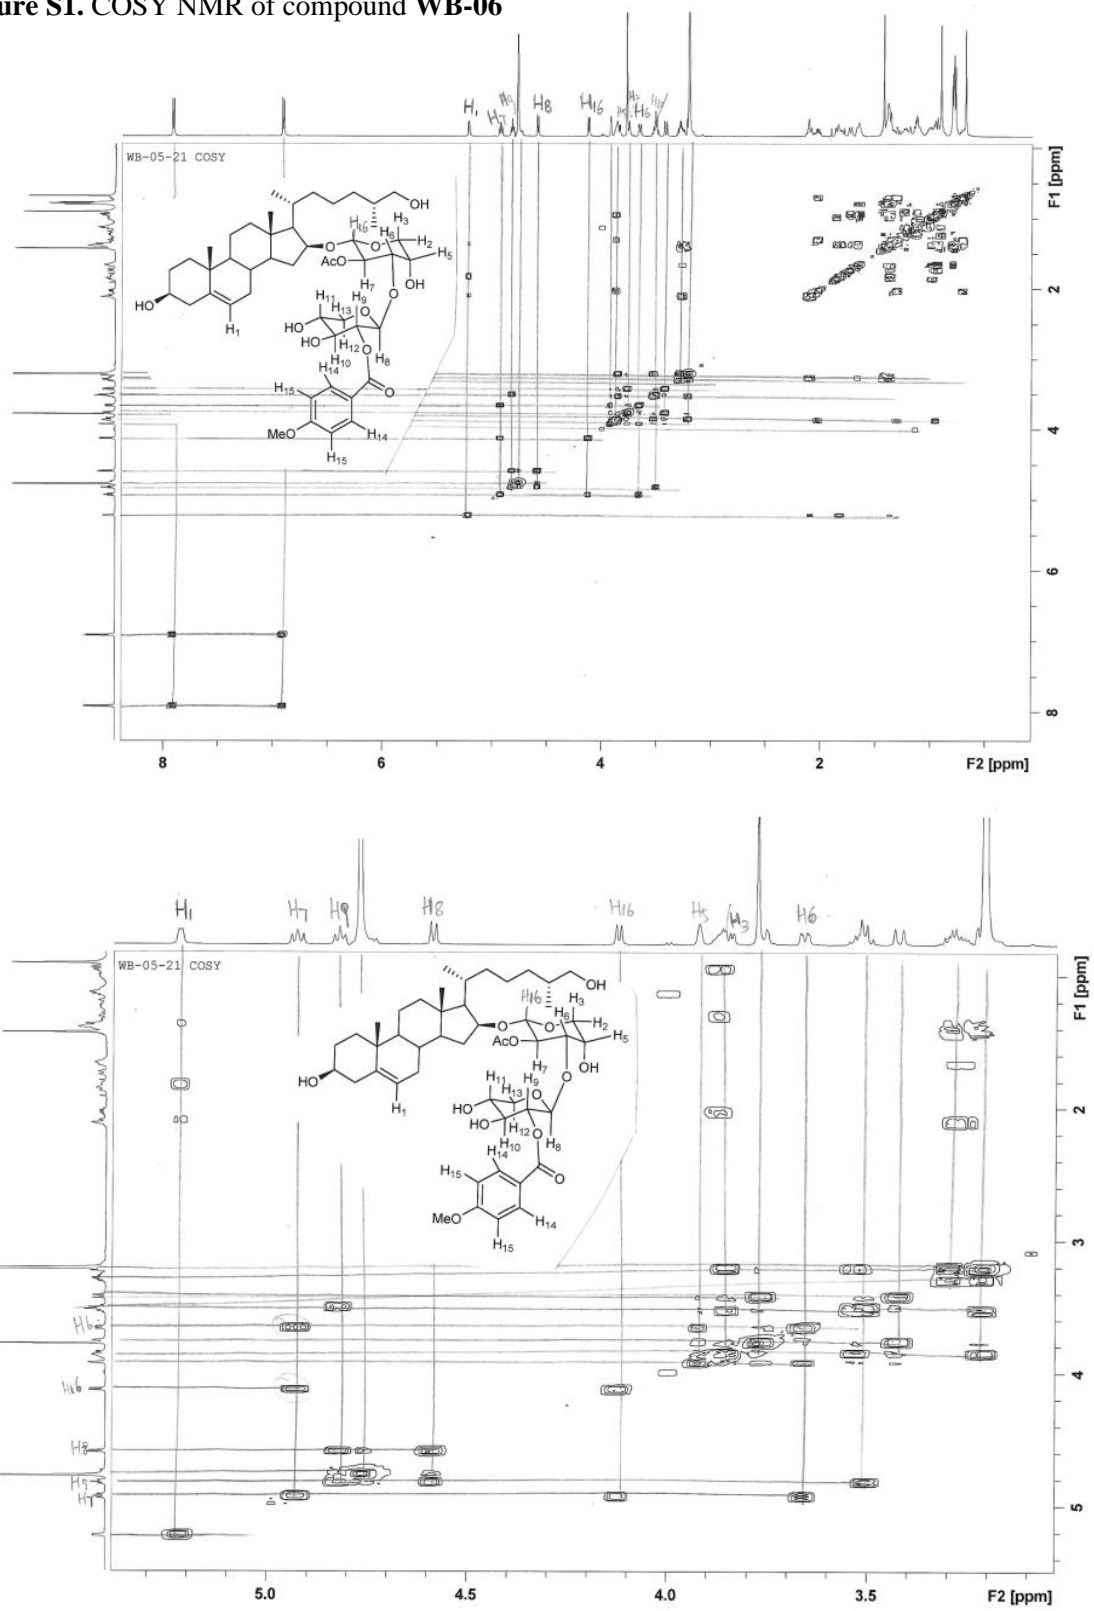

Figure S1. HSQC NMR of compound **WB-06**

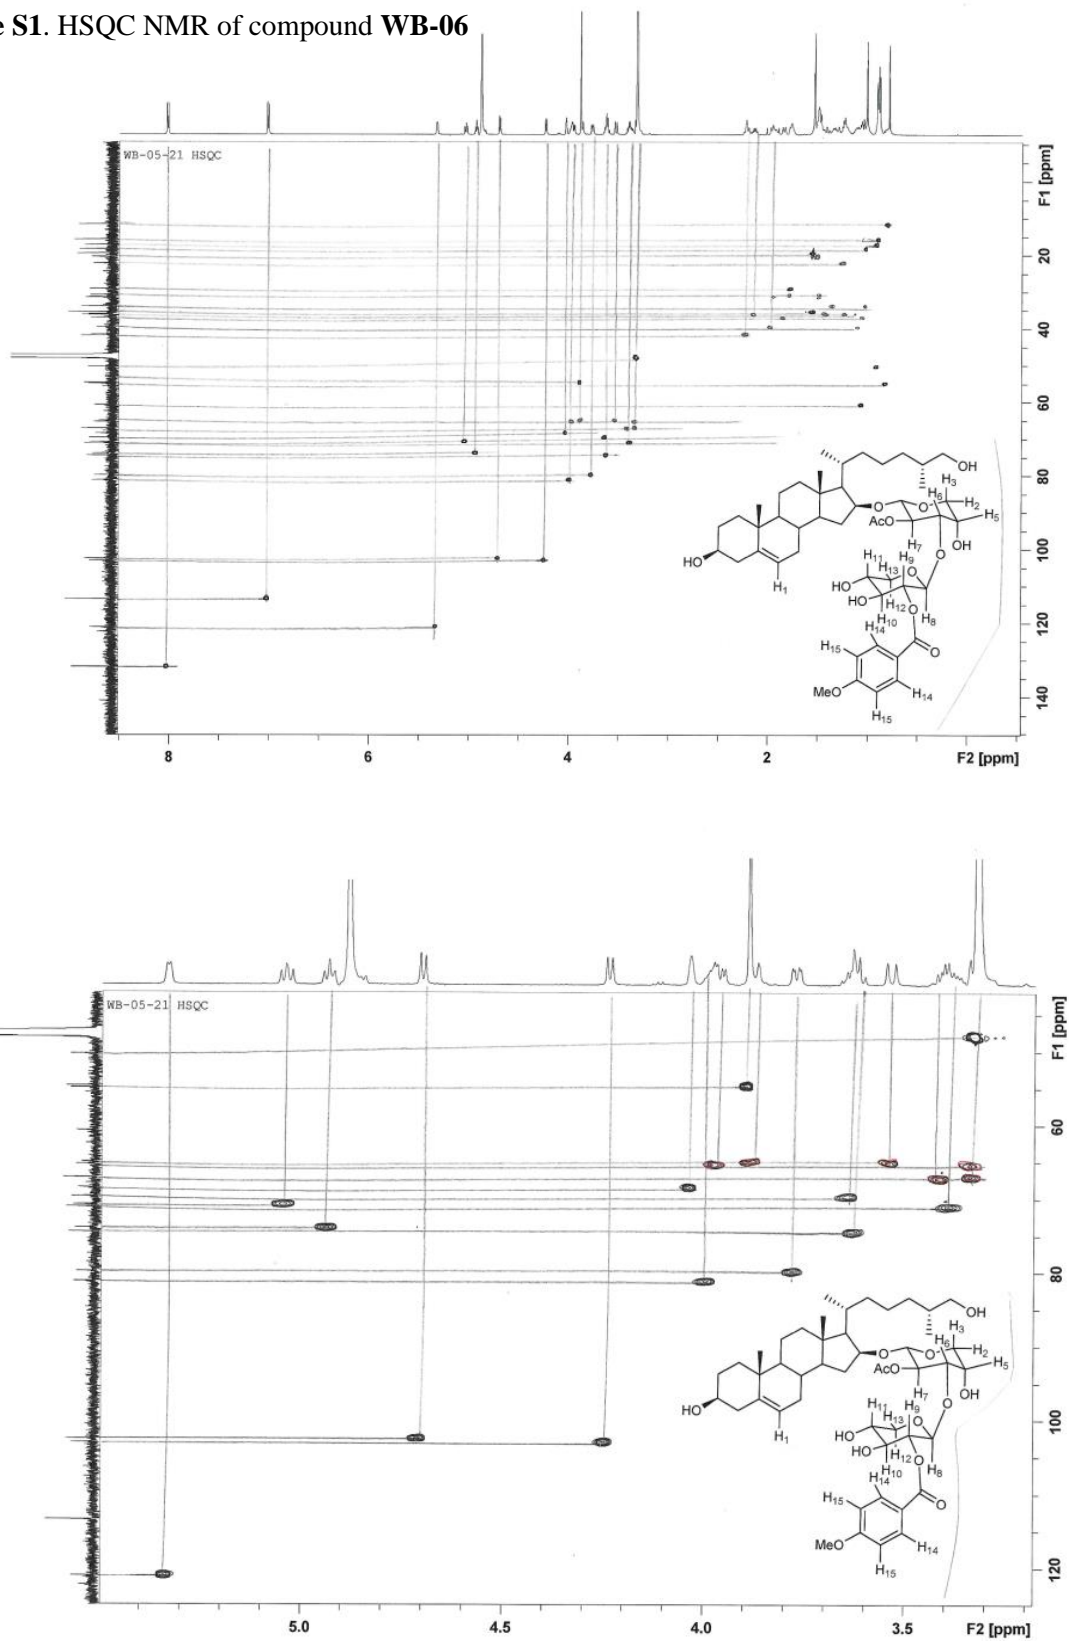

Figure S1. HMBC NMR of compound **WB-06**

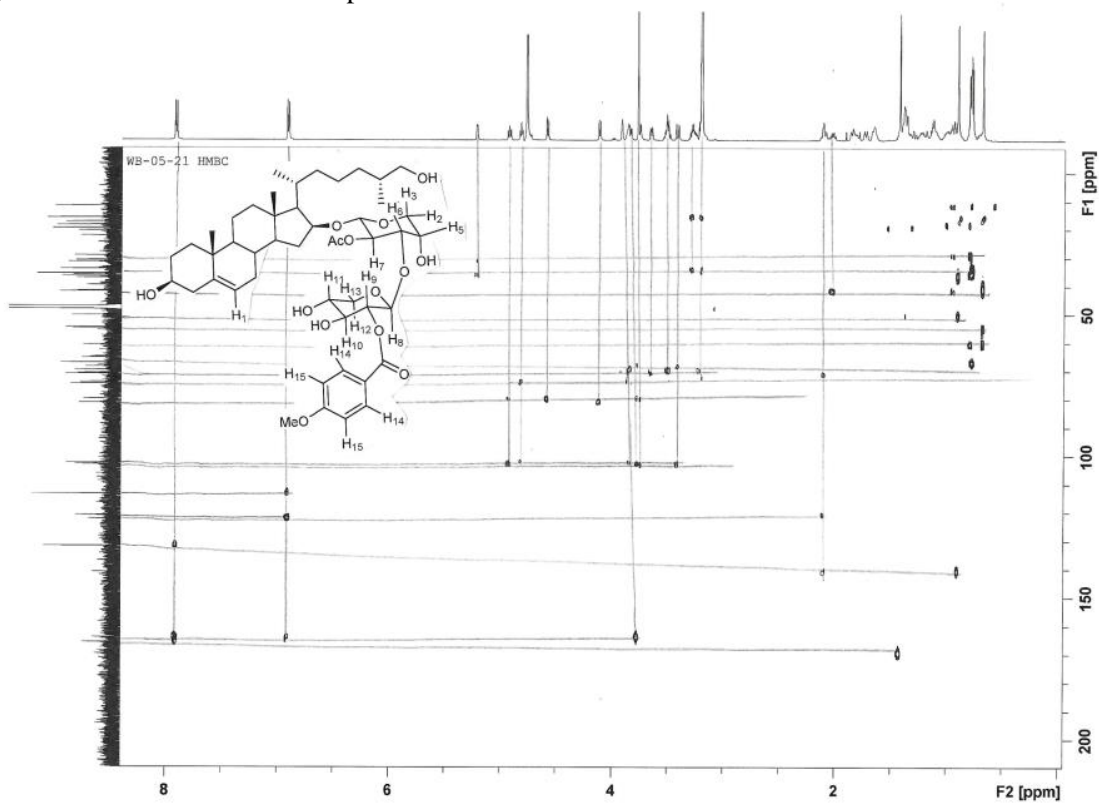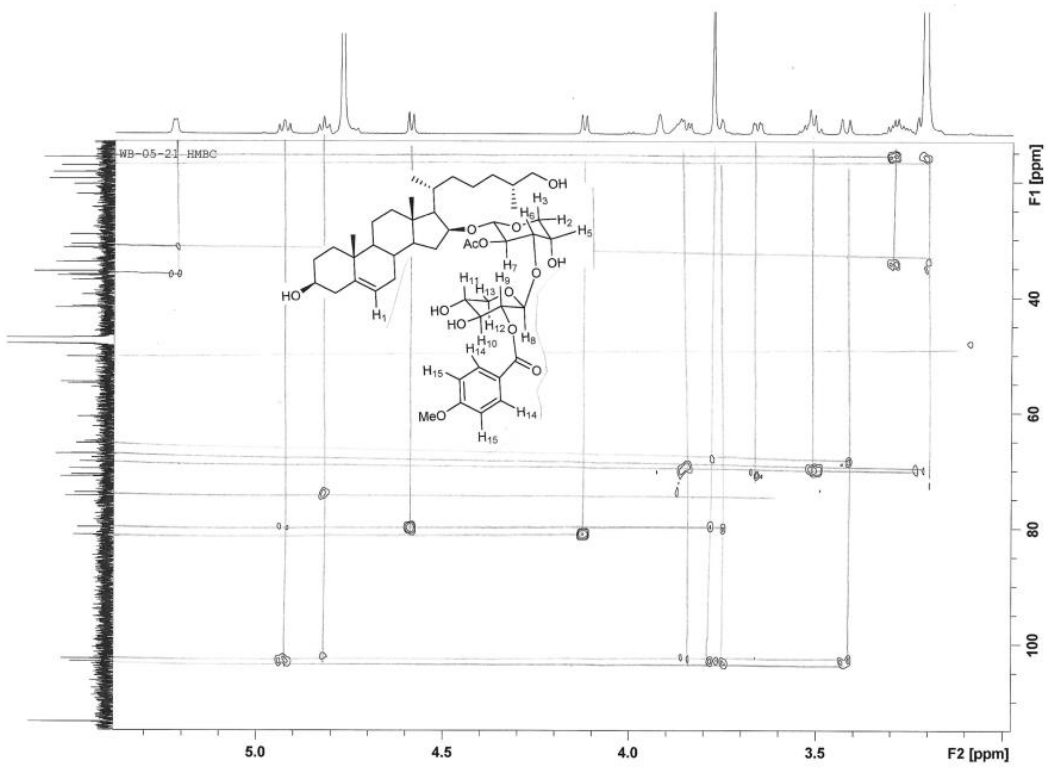

Sample Name: WB-6

=====

|                                        |                       |
|----------------------------------------|-----------------------|
| Acq. Operator : SYSTEM                 | Seq. Line : 9         |
| Acq. Instrument : LCMSD1               | Location : 44         |
| Injection Date : 10/20/2021 7:37:17 PM | Inj : 1               |
|                                        | Inj Volume : 5.000 µl |

Method : D:\Chem32\1\Data\crosslink lingfei\_0717test 2021-10-20 18-13-22  
Sequence-LCMS.M (Sequence Method)

Last changed : 10/20/2021 6:13:22 PM by SYSTEM

Method Info : DON'T CHANGE THIS METHOD

Additional Info : Peak(s) manually integrated

=====

Additional Info : Peak(s) manually integrated

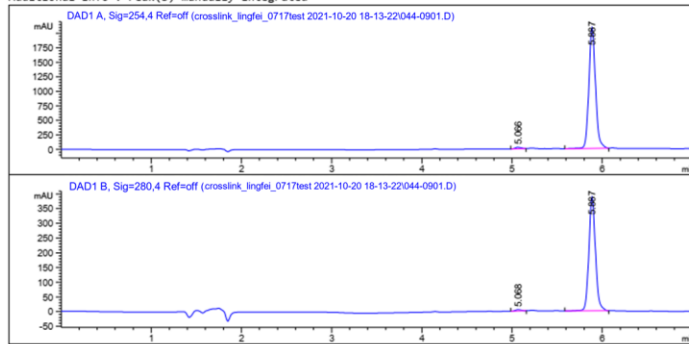

Sample Name: WB-6

=====

Area Percent Report

=====

Sorted By : Signal

Multiplier : 1.0000

Dilution : 1.0000

Use Multiplier & Dilution Factor with ISTDs

Signal 1: DAD1 A, Sig=254,4 Ref=off

| Peak #   | RetTime [min] | Type | Width [min] | Area [mAU*s] | Height [mAU] | Area %  |
|----------|---------------|------|-------------|--------------|--------------|---------|
| 1        | 5.066         | BB   | 0.0706      | 111.88261    | 24.79895     | 1.0468  |
| 2        | 5.887         | BB   | 0.0773      | 1.05759e4    | 2080.15894   | 98.9532 |
| Totals : |               |      |             | 1.06877e4    | 2104.95788   |         |

Signal 2: DAD1 B, Sig=280,4 Ref=off

| Peak #   | RetTime [min] | Type | Width [min] | Area [mAU*s] | Height [mAU] | Area %  |
|----------|---------------|------|-------------|--------------|--------------|---------|
| 1        | 5.068         | BB   | 0.0770      | 19.74861     | 4.19021      | 0.9959  |
| 2        | 5.887         | BB   | 0.0772      | 1963.31653   | 386.58878    | 99.0041 |
| Totals : |               |      |             | 1983.06514   | 390.77899    |         |

Figure S1. HPLC of compound **WB-06**
